# Supplementary material for: Transcriptome-wide stability analysis uncovers LARP4-mediated NFκB1 mRNA stabilization during T cell activation
Source: PubMed Central journal article supplement (PMC7470963; doi:10.1093/nar/gkaa643), 2020-07-31
Supplement: gkaa643_supplemental_file.pdf [file gkaa643_supplemental_file.pdf]

# Transcriptome-wide stability analysis uncovers LARP4-

## mediated NFκB1 mRNA stabilization during T cell activation

Yi Tian<sup>1,2,3,†</sup>, Zhouhao Zeng<sup>1,†</sup>, Xiang Li<sup>1,†</sup>, Yiyin Wang<sup>2</sup>, Runsen Chen<sup>2</sup>, Sandy Mattijssen<sup>4</sup>, Sergei Gaidamakov<sup>4</sup>, Yuzhang Wu<sup>3</sup>, Richard Maraia<sup>4</sup>, Weiqun Peng<sup>1,\*</sup>, Jun Zhu<sup>2,\*</sup>

### Inventory

Figure S1. The stability of BrU-labeled transcripts derived from 12 housekeeping genes in resting and activated CD4<sup>+</sup> T cells.

Figure S2. Enrichment analysis of BrU immunoprecipitation.

Figure S3. Comparison of  $\beta_s$  and  $\beta_{IR}$  of expressed genes derived from three independent datasets of human resting CD4<sup>+</sup> T cells.

Figure S4. Genes with unstable and stable transcripts were enriched in distinct functions.

Figure S5. RT-qPCR analysis of the relative expression level of U6 splicesomal RNA in cytoplasmic (Cyto) and nuclear (Nuc) RNA.

Figure S6. Validation of the mixture model using cytoplasmic BruChase-seq data of resting CD4<sup>+</sup> T cells.

Figure S7. Validation using orthogonal approaches.

Figure S8. Comparative analysis of transcriptional activity determined by RNA Pol II ChIP-Seq and Bru-Seq.

Figure S9. Normalized read-profiles (Bru-seq data) of BrU-labeled transcripts for the *NFκB1* (A) and *CRKL* (B) genes at 0h time point in resting and activated human CD4<sup>+</sup> T cells.

Figure S10. Validation of activation-stabilized transcripts using cytoplasmic mRNA and transcription inhibition.

Figure S11. The effect of *LARP4* knockdown (KD) on *NFκB1* expression in human CD4<sup>+</sup> T cells.

Figure S12. Cytokine production by WT and *Lapr4* KO CD4<sup>+</sup> T cells.

Figure S13. The coordinates of the CLIP-qPCR primer pairs in the 3'UTR of *NFκB1* and *CRKL*.

Table S1. Primers used for RT-PCR validation of the spliced and intron-retained transcript level in human.

Table S2. Primers used for RT-PCR validation of the spliced transcript level in mouse.

Table S3. Primers used for Pol II ChIP-qPCR validation in human.

Table S4. Primers used for Pol II ChIP-qPCR validation in mouse.

Table S5. Primers used for LARP4 CLIP-qPCR validation in human.

Table S6. The complete list for the upregulated genes with increased Pol II occupancy, increased splicing efficiency (PST) and/or increased stability ( $\beta_s$ ) upon activation in human T cells.

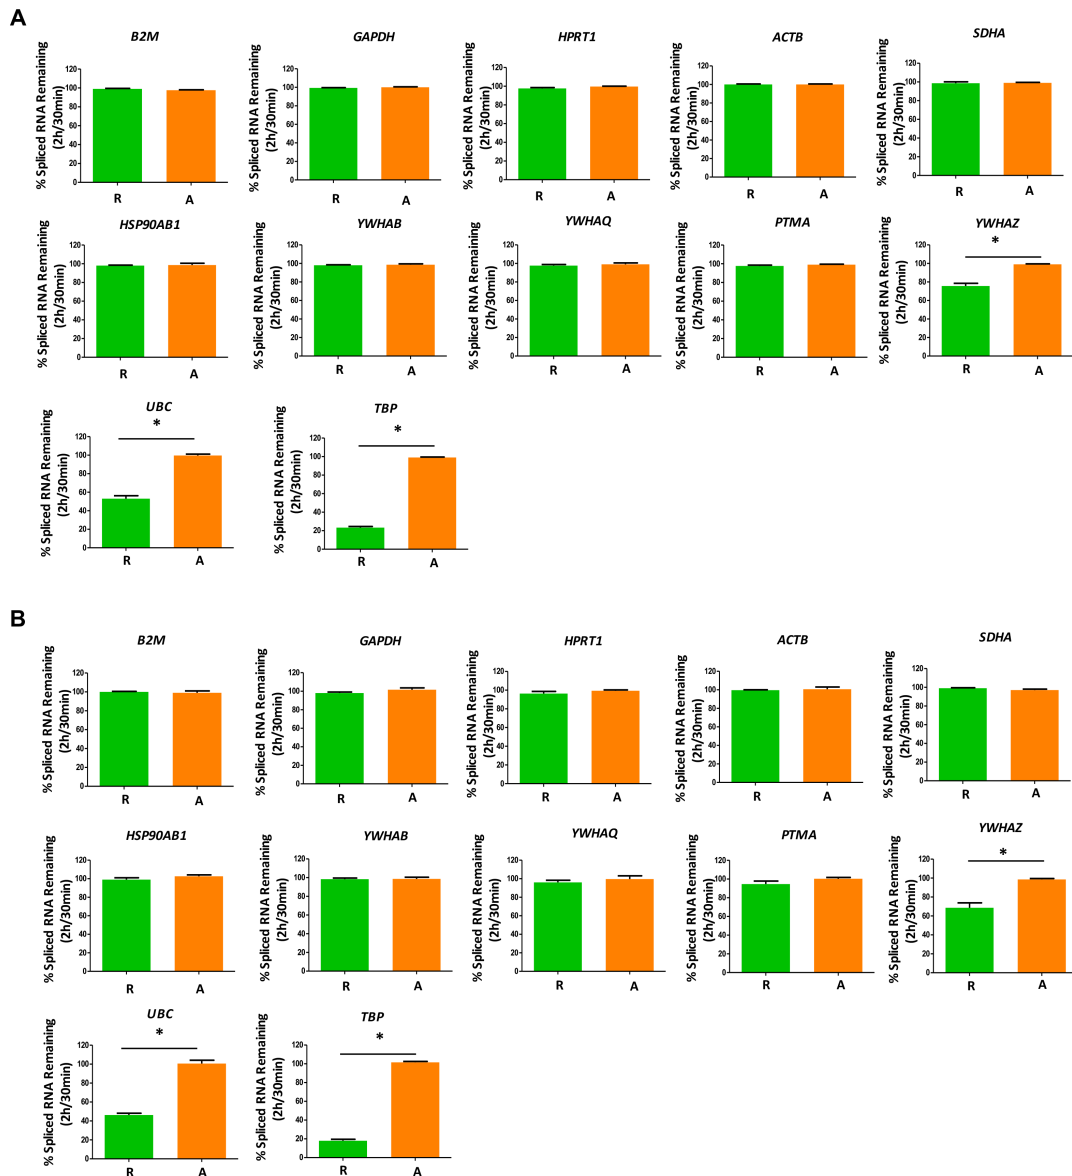

**Figure S1. The stability of BrU-labeled transcripts derived from 12 housekeeping genes in resting and activated CD4<sup>+</sup> T cells.**

The Spike-in control RNA (ERCC-00002) was BrU labelled by in vitro transcription and added into individual BruChase-seq samples before RNA purification at equal amount.

A. Using total RNA as the input material, the stability of each transcript of interest was assessed by the percentage of BrU-labeled spliced transcripts at 2 h to that at 0.5 h, normalized by the level of BrU-labeled spike-in control. B. Using cytoplasmic RNA as the input material, the stability of each transcript of interest was assessed by the percentage of BrU-labeled spliced transcripts at 2 h to that at 0.5 h, normalized by the level of BrU-labeled spike-in control. R and A represent resting and activated CD4<sup>+</sup> T cells, respectively. The error bars represent  $\pm$ SEM based on three biological replicates (\* $p$ <0.05).

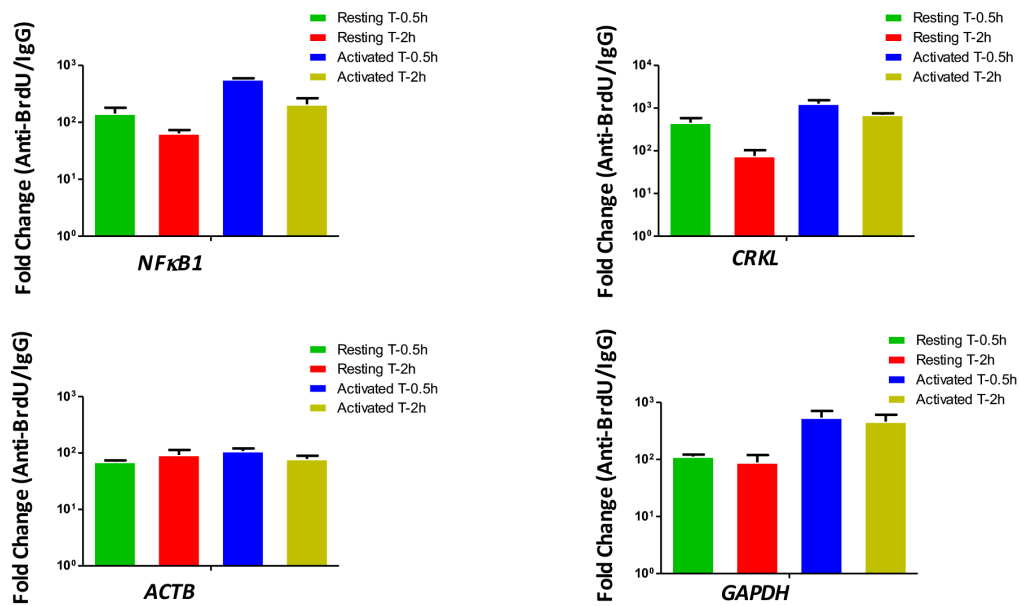

**Figure S2. Enrichment analysis of BrU immunoprecipitation.**

For each BruChase time point, BrU-labeled RNAs were immunoprecipitated with specific anti-BrdU antibody or non-specific IgG. The resulting RNAs were then subjected to RT-qPCR analysis. The fold enrichment of BrU RNA was determined by the ratio of the relative abundance of each transcript in specific and non-specific IP experiments. The error bars represent  $\pm$ SEM based on three biological replicates.

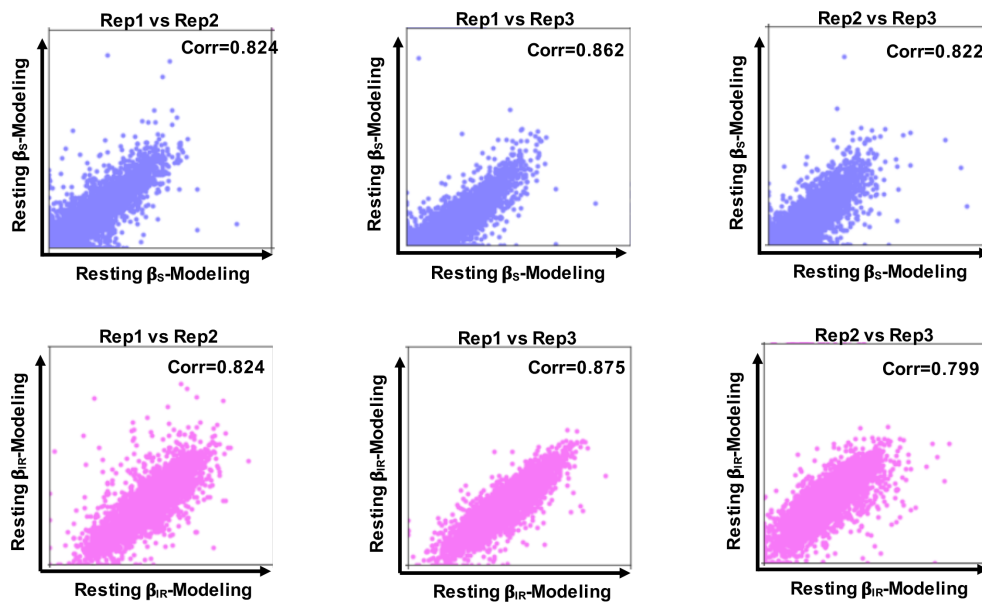

**Figure S3. Comparison of  $\beta_s$  and  $\beta_{IR}$  of expressed genes derived from three independent datasets of human resting  $CD4^+$  T cells.**

Scatter plots showing pairwise correlation of model-fitted  $\beta_s$  (blue) or  $\beta_{IR}$  (pink) among three independent BruChase-Seq data sets. The three data sets were obtained using human resting  $CD4^+$  T cells prepared from unrelated blood donors.

|                                                                                | Homo Sapiens Housekeeping Genes<br>3804 | Homo Sapiens Transcription Factors Genes<br>1665 |
|--------------------------------------------------------------------------------|-----------------------------------------|--------------------------------------------------|
| $\beta_S$ -low group: 196 genes from Bottom 1200 of $\beta_S$ , with RPKM > 30 | 113                                     | 10                                               |
| $\beta_S$ -high group: 229 genes from Top 500 of $\beta_S$                     | 44                                      | 98                                               |

Fisher Exact Test: p-value=6.4899e<sup>-32</sup>

**Figure S4. Genes with unstable and stable transcripts were enriched in distinct functions.**

229 unstable transcripts were identified as the overlap between the top 500 transcripts with the highest  $\beta_S$  in resting and activated states. 196 highly-expressed (RPKM>30 in both resting and activated states) stable transcripts were identified as those ranked among the bottom 1200 in terms of  $\beta_S$  in both resting and activated states. The overlaps of these two gene sets with a database of housekeeping genes ([https://www.tau.ac.il/~elieis/HKG/HK\\_genes.txt](https://www.tau.ac.il/~elieis/HKG/HK_genes.txt)) and a database of transcription factors are shown (p =6.49E-32, Fisher's exact test).

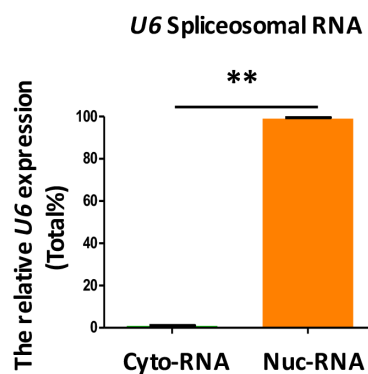

**Figure S5. RT-qPCR analysis of the relative expression level of U6 spliceosomal RNA in cytoplasmic (Cyto) and nuclear (Nuc) RNA.**

The relative expression level of U6 spliceosomal RNA in total, Cyto and Nuc RNA was determined by RT-qPCR. Data are expressed as the percentage of the total RNA. The error bars represent  $\pm$ SEM based on three biological replicates (\*\*p < 0.01).

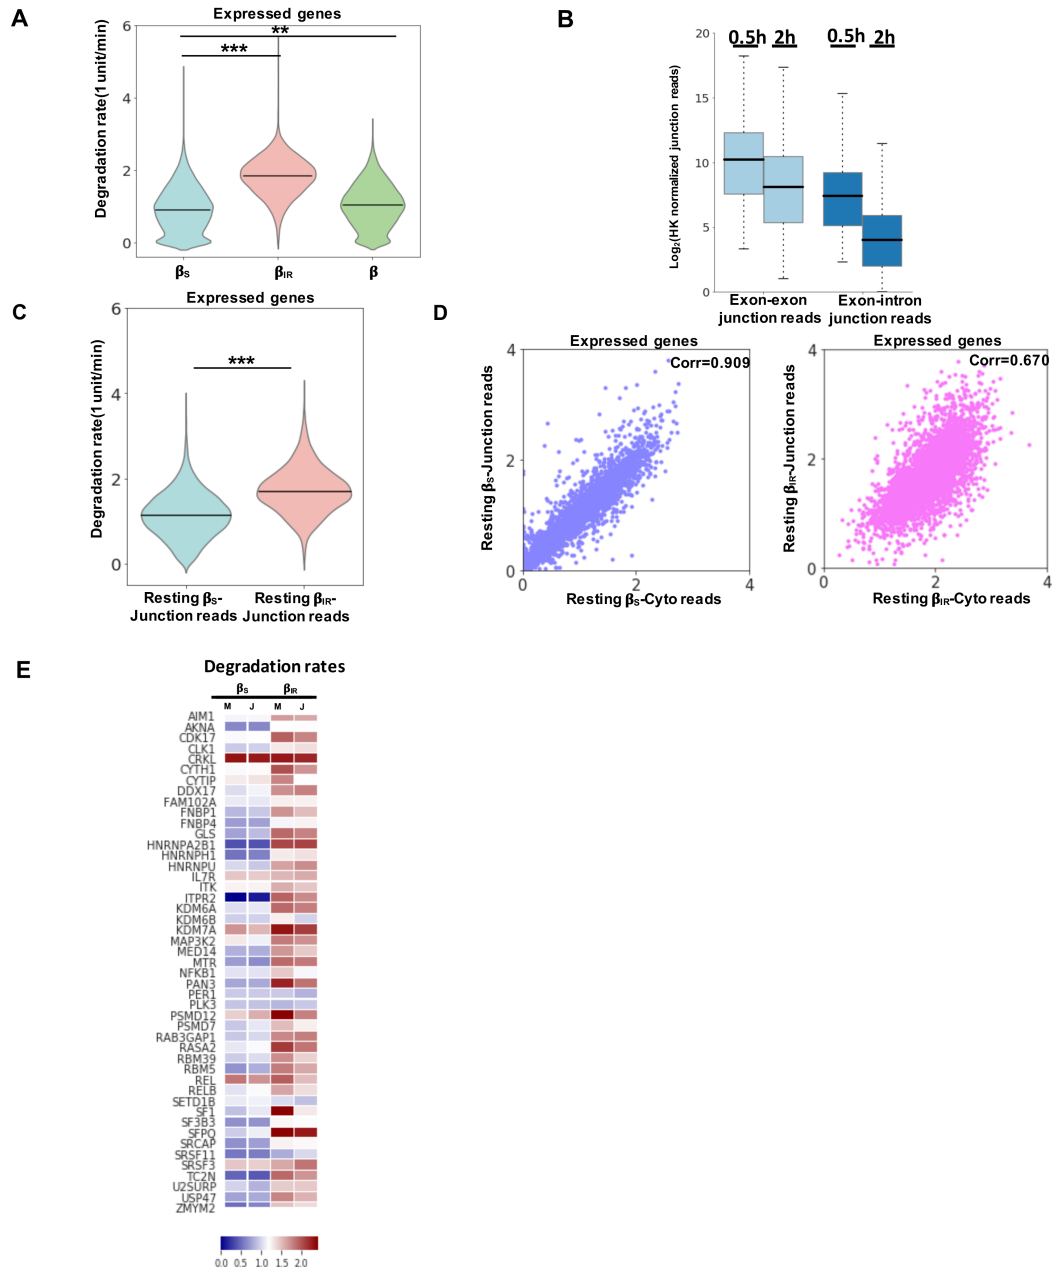

**Figure S6. Validation of the mixture model using cytoplasmic BruChase-seq data of resting CD4<sup>+</sup> T cells.**

**A.** Box plot showing the distribution of  $\beta_S$  and  $\beta_{IR}$  (fitted by the two-component model),  $\beta$  (fitted by the conventional one-component model) of expressed genes derived from cytoplasmic BruChase-seq data in resting CD4<sup>+</sup> T cells. In comparison,  $\beta_S$  was significantly different from  $\beta_{IR}$  and  $\beta$ , respectively. \*\* stands for  $p = 1.57E-46$  and \*\*\* stands for  $p < 1E-300$  (one-sided Mann-Whitney U test).

**B.** Distributions of normalized exon-exon and exon-intron junction reads of individual genes at the 0.5 h and 2 h chase-time points based on the cytoplasmic BruChase-seq data of resting CD4<sup>+</sup> T cells.

**C.** Violin plots showing the distribution of  $\beta_S$  and  $\beta_{IR}$  of expressed genes derived from the mixture model using junction reads in the resting state ( $p < 1E-300$ , one-sided Mann-Whitney U test).

**D.** Scatter plots showing the correlation between degradation rates of expressed genes derived from the mixture model using all reads (Cyto reads, x-axis) and junction reads (y-axis) of the cytoplasmic BruChase-seq data.  $\beta_S$ : blue and  $\beta_{IR}$ : pink.

**E.** Heat map for the  $\beta_S$  and  $\beta_{IR}$  values of 50 representative genes derived from the mixture model based on all reads (M) and the mixture model based on junction reads (J). The color denotes the row-wise z-score.

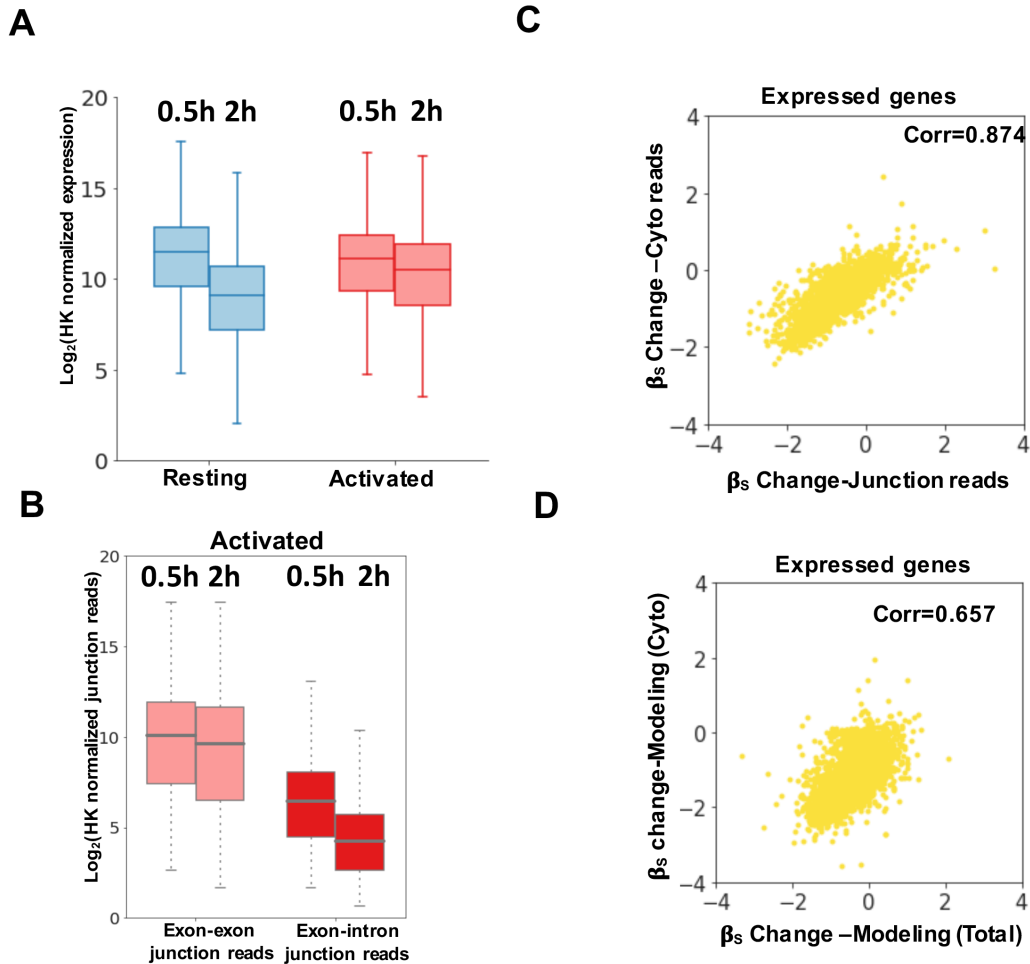

**Figure S7. Validation using orthogonal approaches.**

A. Boxplot showing the distribution of normalized gene expression levels at 0.5 h and 2 h of the cytoplasmic BruChase-seq data.

B. Boxplot showing normalized read counts of exon-exon junction reads and exon-intron junction reads at 0.5 h and 2 h of the cytoplasmic BruChase-seq data of activated CD4<sup>+</sup> T cells.

C. Correlation analysis of  $\beta_S$  changes (activated-resting) estimated by the two-component mixture model using junction reads (x-axis) and all reads (Cyto reads, y-axis) of cytoplasmic BruChase-seq data.

D. Correlation analysis of  $\beta_S$  changes (activated-resting) estimated by the two-component mixture model based on total (x-axis) and cytoplasmic (y-axis) BruChase-seq data.

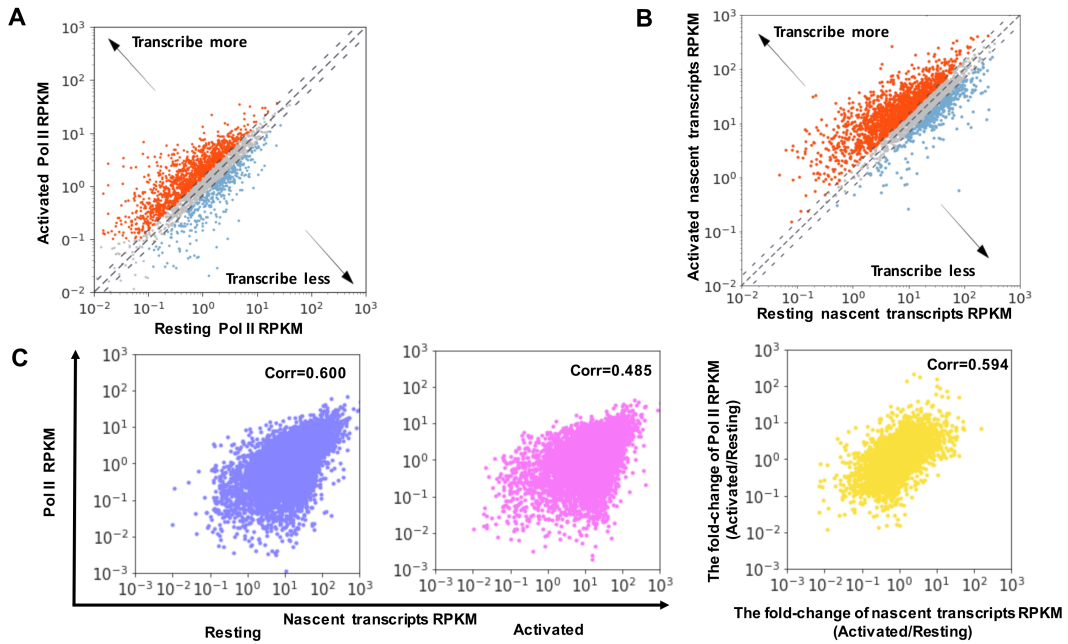

**Figure S8. Comparative analysis of transcriptional activity determined by RNA Pol II ChIP-Seq and Bru-Seq.**

A. Scatterplot showing the RPKM level of RNA Pol II at the promoters of the upregulated genes under resting (x-axis) and activated (y-axis) conditions. Dashed lines denote Pol II RPKM fold change =  $\pm 1.5$ .  $p = 3.27E-15$ , one-sided Mann-Whitney U test.

B. Scatterplot showing the RPKM level of nascent transcripts (Bru-seq or BruChase-Seq 0 hr) of the upregulated genes under resting (x-axis) and activated (y-axis) conditions. Dashed lines denote Pol II RPKM fold change =  $\pm 1.5$ .  $p = 3.77E-41$ , one-sided Mann-Whitney U test.

C. Scatterplot showing the correlation between the RNA Pol II RPKM (x-axis) and nascent transcripts RPKM (y-axis). The results for resting and activated CD4<sup>+</sup> T cells are shown in blue and pink, respectively. The changes between the two conditions (activated/resting) are shown in yellow.

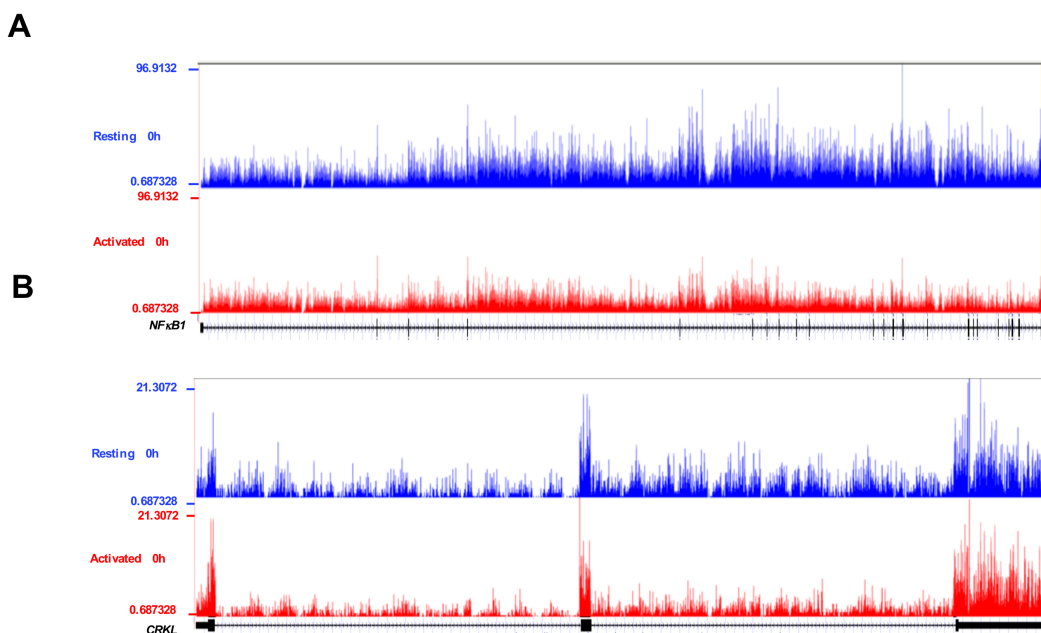

**Figure S9. Normalized read-profiles (Bru-seq data) of BrU-labeled transcripts for the *NFKB1* (A) and *CRKL* (B) genes at 0h time point in resting and activated human CD4<sup>+</sup> T cells.**

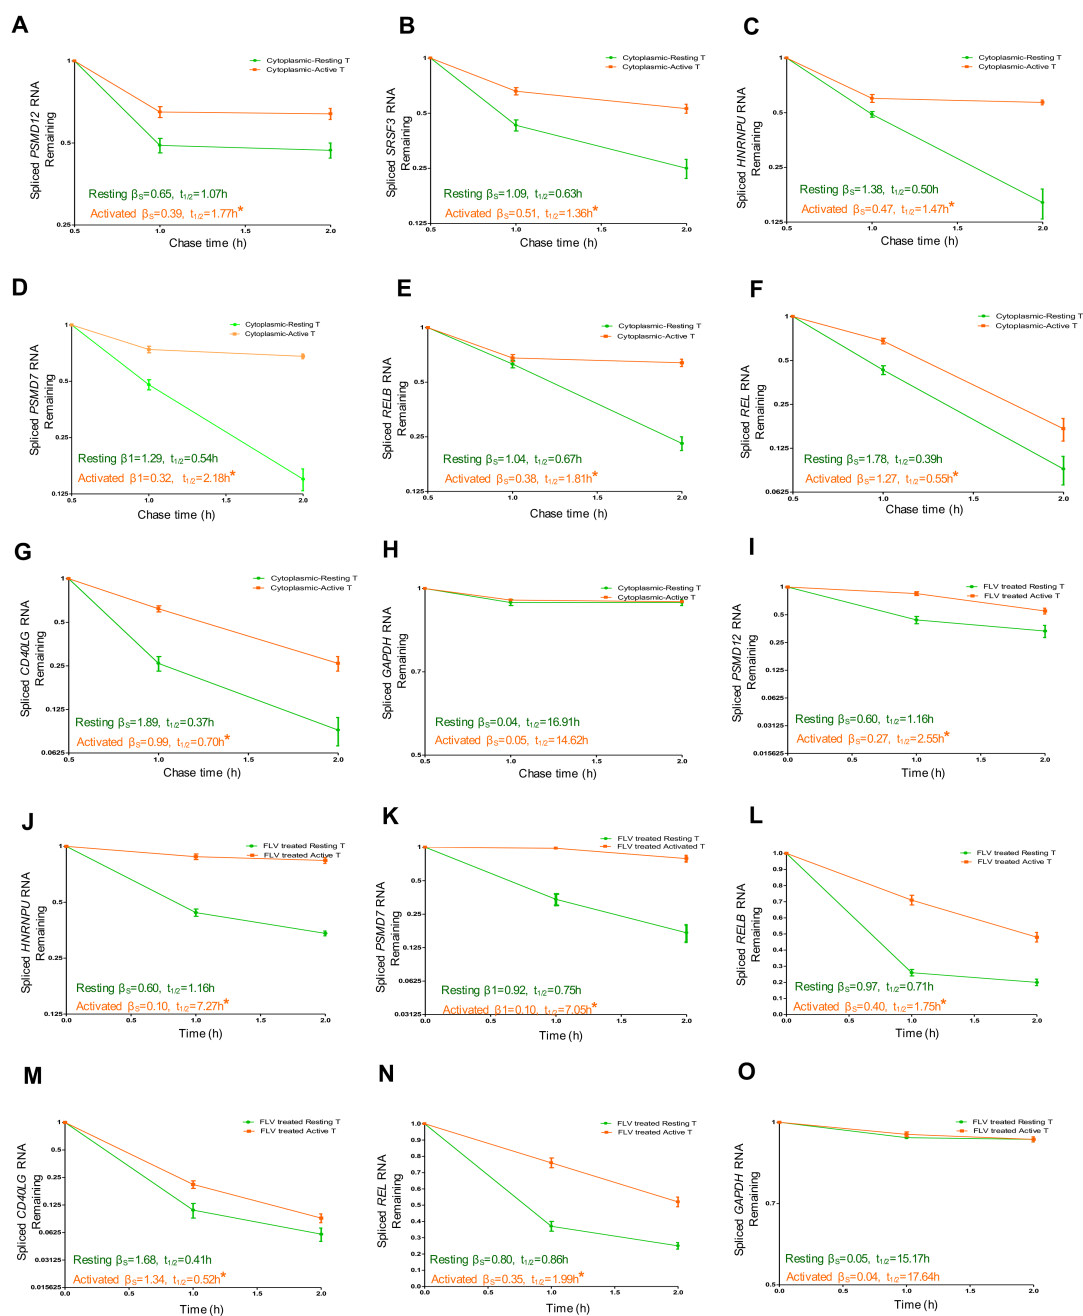

**Figure S10 Validation of activation-stabilized transcripts using cytoplasmic mRNA and transcription inhibition.**

The half-lives of BrU-labeled cytoplasmic *PSMD12* (A), *SRSF3* (B), *HNRNPU* (C), *PSMD7* (D), *RELB* (E), *REL* (F), and *CD40LG* (G) mRNAs were determined by RT-qPCR using a 3-point time course. The half-lives of *PSMD12* (I), *HNRNPU* (J), *PSMD7* (K), *RELB* (L), *CD40LG* (M), and *REL* (N) mRNAs were determined by RT-qPCR following FLV-mediated transcription inhibition. The *GAPDH* (H and O) transcript was used as an internal control. Data from the resting and activated T cells are shown in green and orange, respectively. The mRNA half-life was



calculated using a one-phase decay model. The significance of the differences was calculated using paired t-test and Error bars represent  $\pm$ SEM from three biological replicates (\* $p < 0.05$ ; \*\* $p < 0.01$ ).

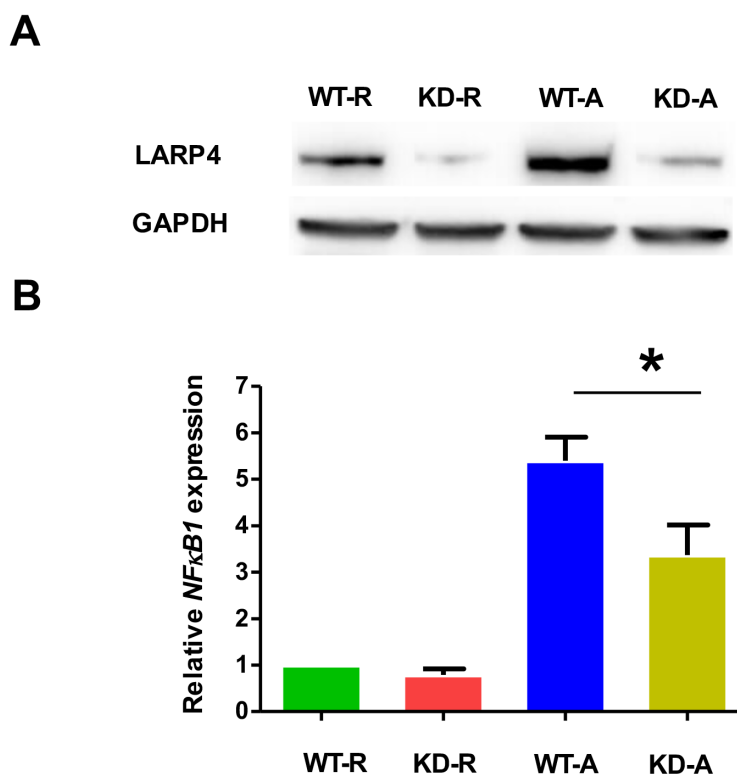

**Figure S11. The effect of *LARP4* knockdown (KD) on *NFκB1* expression in human  $CD4^+$  T cells.**

Human  $CD4^+$  T cells were transfected with *LARP4* siRNA or control RNA. 48 h after transfection, cells were activated by CD3/CD28 for an additional 16 hours. (A) Western Blotting analysis of the *LARP4* protein in human resting and activated  $CD4^+$  T cells with and without *LARP4* KD. *GAPDH* was used as an internal control. (B) RT-qPCR analysis of the relative expression level of the *NFκB1* mRNA in human resting and activated  $CD4^+$  T cells with and without *LARP4* KD. *GAPDH* was used as the normalizing control. The error bars represent  $\pm$ SEM based on three biological replicates (\* $p < 0.05$ ).

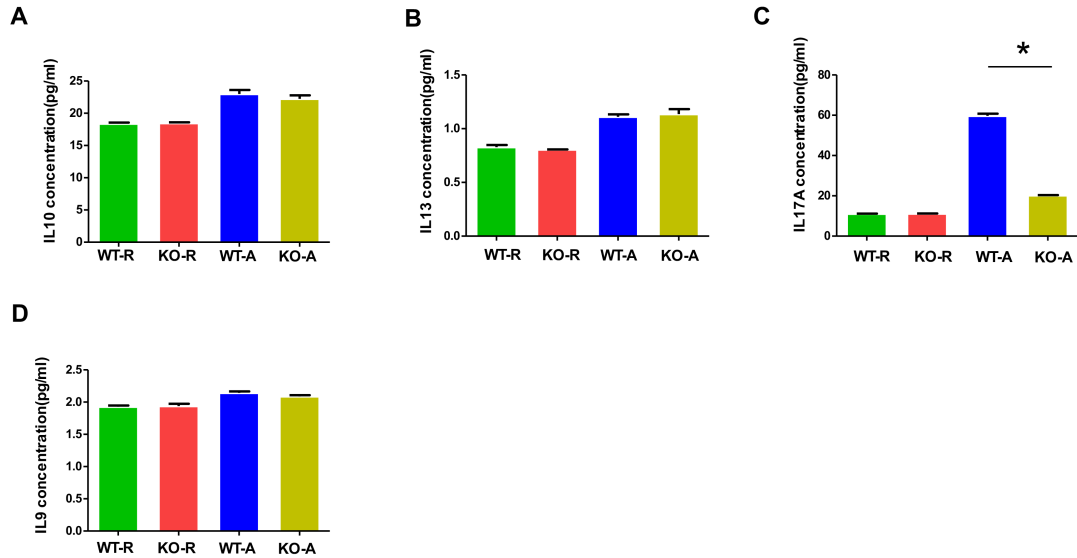

**Figure S12. Cytokine production by WT and LARP4 KO CD4<sup>+</sup> T cells.**

Cytokines secreted by resting and activated CD4<sup>+</sup> T cells were analyzed in WT and LARP4 KO mice. The levels of IL-10 (**A**), IL-13 (**B**), IL-17A (**C**) and IL-9 (**D**) in the culture supernatant were determined by the LEGENDplex™ Cytometric Bead Assay (BioLegend). R and A represent resting and activated CD4<sup>+</sup> T cells, respectively. Error bars represent  $\pm$ SEM from three biological replicates (\* $p < 0.05$ ).

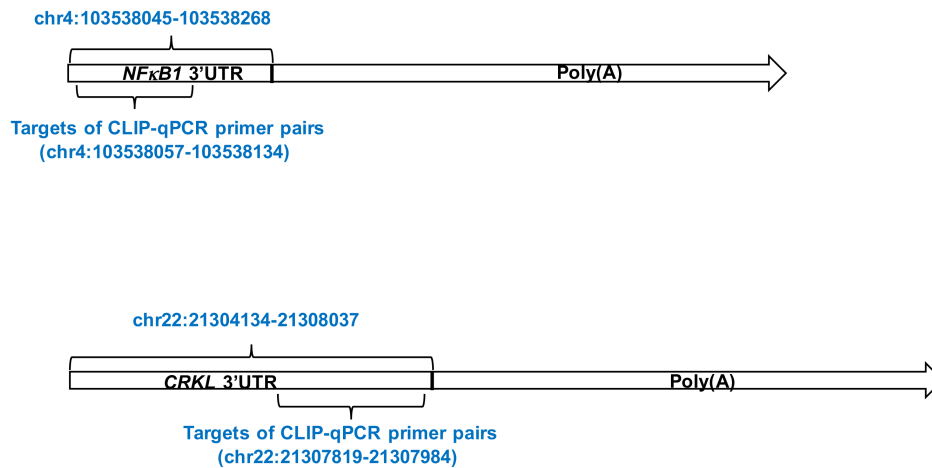

**Figure S13. The coordinates of the CLIP-qPCR primer pairs in the 3'UTR of NFkB1 and CRKL.**

**Table S1. Primers used for RT-PCR validation of the spliced and intron-retained transcript level in human.**

| Gene name       | Primer name  | Primer sequence (5' to 3') |
|-----------------|--------------|----------------------------|
| <i>NFκB1</i>    | NFκB1_E6_F   | AACTGCTGGACCCAAGGACA       |
|                 | NFκB1_I6_R   | GTGGTCACCTTACTTCCTGGA      |
|                 | NFκB1_E7_R   | ACGCCTCTGTCATTCGTGCT       |
| <i>CRKL</i>     | CRKL_E1_F    | CCACTACCTGGACACCACCA       |
|                 | CRKL_I1_R    | CCCCTATACAAGCACTCTTCG      |
|                 | CRKL_E2_R    | AAAGGGCAGGTCTTCGGCAT       |
| <i>PSMD7</i>    | PSMD7_E3_F   | TTTGATGAAGATGACAAAGACGA    |
|                 | PSMD7_E4_R   | AGGACAGTATCTTTTCATGAGTTTCG |
| <i>PSMD12</i>   | PSMD12_E5_F  | ATGGTGATGTGAAAGAGGCA       |
|                 | PSMD12_E6_R  | TAGGCAGAGCCTCATTTGCT       |
| <i>SRSF3</i>    | SRSF3_E2_F   | CTGATGCAGTCCGAGAGCTA       |
|                 | SRSF3_E3_R   | GAGGTGGGCCACGATTTCTA       |
| <i>HNRNPU</i>   | HNRNPU_E12_F | ACAGAGGGAACACTACAACCAGAACT |
|                 | HNRNPU_E13_R | ACCCTGCTGCCACTGGTTG        |
| <i>RELB</i>     | RELB_E4_F    | CCATCGAGCTCCGGGATTGT       |
|                 | RELB_E5_R    | CAGTCCTTCCACACCAGGCA       |
| <i>REL</i>      | REL_E1_F     | GGCCTCCTGACTGACTGACTG      |
|                 | REL_E2_R     | CCCTCTGCCTGGGTTGTTCA       |
| <i>CD40LG</i>   | CD40LG_E1_F  | ATTGGGTCAGCACTTTTTGC       |
|                 | CD40LG_E2_R  | TCACAAAGCCTTCAAACCTGG      |
| <i>GAPDH</i>    | GAPDH_F      | CAAGAAGGTGGTGAAGCAGG       |
|                 | GAPDH_R      | AAAGGTGGAGGAGTGGGTGT       |
| <i>B2M</i>      | B2M-F        | CCTGAATTGCTATGTGTCTG       |
|                 | B2M-R        | CTAACTATCTTGGGCTGTGA       |
| <i>ACTB</i>     | ACTB-F       | GAGACCTTCAACACCCCGAG       |
|                 | ACTB-R       | TCACGCACGATTTCCCGCT        |
| <i>HPRT1</i>    | HPRT1-F      | TTCAGGCGGCTGCGACGAG        |
|                 | HPRT1-R      | GTGGCGGAGCAGAGGAGGA        |
| <i>SDHA</i>     | SDHA-F       | TGATCTTCGCTGGCGTGGAC       |
|                 | SDHA-R       | CTGCCCTTGTAGTTGGTGG        |
| <i>HSP90AB1</i> | HSP90AB1-F   | ATGAGGAGGATGACAGCGGT       |
|                 | HSP90AB1-R   | GGGTTTCTGGTCCAATAGGC       |
| <i>YWHAB</i>    | YWHAB-F      | CAGAAAGCCAAACTCGCTGA       |
|                 | YWHAB-R      | AATGCTGGAGATGACACGCC       |
| <i>YWHAQ</i>    | YWHAQ-F      | CGCTCCCTCTCTGCTTTTTG       |
|                 | YWHAQ-R      | GCTCGGTCACTGCCTTCATG       |
| <i>PTMA</i>     | PTMA-F       | AATGAGGAAAATGGGGAGCAG      |
|                 | PTMA-R       | TCACCTTCTTCTTCTCCT         |
| <i>YWHAZ</i>    | YWHAZ-F      | CAACAAGCATACCAAGAAGC       |
|                 | YWHAZ-R      | GAACACAGAGAAGTTAAGGGC      |
| <i>UBC</i>      | UBC-F        | ATTTGGGTCGCGGTTCTTG        |
|                 | UBC-R        | TGCCTTGACATTCTCGATGGT      |
| <i>TBP</i>      | TBP-F        | TGTGCTGGAGATGCTCTAGG       |
|                 | TBP-R        | GTAAGGTGGCAGGCTGTTGT       |

Note: E6 denotes the primer locates at exon6 while I6 means the primer locates at intron 6. F represents forward primer of mRNA while R denotes reverse primer.

**Table S2. Primers used for RT-PCR validation of the spliced transcript level in mouse.**

| Gene | Primer name | Primer sequence (5' to 3') |
|------|-------------|----------------------------|
|------|-------------|----------------------------|

| name         |             |                      |
|--------------|-------------|----------------------|
| <i>Nfkb1</i> | mNFkB1_E7_F | TATGCACCGTAACAGCAGGA |
|              | mNFkB1_E8_R | CCGTGCTTCCAGTGTTC    |
| <i>Crkl</i>  | mCRKL_E2_F  | CGATCAACCCTTTGCCATCC |
|              | mCRKL_E3_R  | ATTCACCTCGCCTTCCCATT |
| <i>Il2</i>   | mIL2-E3-F   | AGATGAACTTGGACCTCTGC |
|              | mIL2-E4-R   | ATGTGTTGTCAGAGCCCTTT |
| <i>Ifny</i>  | mIFNG-E3-F  | TTCTTCAGCAACAGCAAGGC |
|              | mIFNG-E4-R  | GAATCAGCAGCGACTCCTTT |
| <i>Larp4</i> | mLARP4-E1-F | GCTTTGGAGCAGGTGACATC |
|              | mLARP4-E2-R | TCATGCCAAGAGGGTTCAGT |

Table S3. Primers used for Pol II ChIP-qPCR validation in human.

| Gene name    | Primer name  | Primer sequence (5' to 3') |
|--------------|--------------|----------------------------|
| <i>NFkB1</i> | NFkB1_ChIP_F | CCTAGAAGTGCGGGCTTCCC       |
|              | NFkB1_ChIP_R | CCACTGACGTCGAGAGAGCA       |
| <i>STAT1</i> | STAT1_ChIP_F | CAGACTCTGCGCAGGAAAGCGA     |
|              | STAT1_ChIP_R | CGTCTAATTGGCTGAGCGCGGA     |
| <i>CRKL</i>  | CRKL_ChIP_F  | CACGTTACGCTTTGTTCCCA       |
|              | CRKL_ChIP-R  | CGGTAGGCACTCTTCTCCTG       |

Table S4. Primers used for Pol II ChIP-qPCR validation in mouse.

| Gene name    | Primer name  | Primer sequence (5' to 3') |
|--------------|--------------|----------------------------|
| <i>Nfkb1</i> | mNFkB1_F     | CCTCGGTACTTCTCTCTCGT       |
|              | mNFkB1_R     | CTCGACGTCAGTGGGAATTT       |
| <i>Crkl</i>  | mCRKL_ChIP_F | GTCCAGTCATCCTCACCAAC       |
|              | mCRKL_ChIP_R | CCAGAAGGCCCTGGTAAATC       |
| <i>Il2</i>   | mIL2_F       | GAGCTTGAAGTGGAGCTTGA       |
|              | mIL2-R       | AAATTGCCTCCCATGCTGAA       |

Table S5. Primers used for LARP4 CLIP-qPCR validation in human.

| Gene name    | Primer name  | Primer sequence (5' to 3') |
|--------------|--------------|----------------------------|
| <i>NFkB1</i> | NFkB1_CLIP_F | GCTGTTGTCCCTCTGCTACG       |
|              | NFkB1_CLIP_R | TGCTGTGGTCAGAAGGAATGC      |
| <i>CRKL</i>  | CRKL_CLIP_F  | TTTGGGGATCATAGCTTGT        |
|              | CRKL_CLIP_R  | CCATGGAAACAAGGGTTTTG       |

**Table S6. The complete list for the upregulated genes with increased Pol II occupancy, increased splicing efficiency (PST) and/or increased stability ( $\beta$ s) upon activation in human T cells.**

| Gene name       | Regulatory factor | Pol II | PST   | $\beta$ s |
|-----------------|-------------------|--------|-------|-----------|
| <i>RNF14</i>    |                   | TRUE   | TRUE  | TRUE      |
| <i>C16orf13</i> |                   | TRUE   | FALSE | FALSE     |
| <i>COPRS</i>    |                   | TRUE   | TRUE  | TRUE      |
| <i>ZC3H10</i>   |                   | TRUE   | TRUE  | FALSE     |
| <i>ZC3H14</i>   |                   | TRUE   | TRUE  | TRUE      |
| <i>GRINA</i>    |                   | TRUE   | TRUE  | FALSE     |
| <i>NUP93</i>    |                   | TRUE   | TRUE  | TRUE      |
| <i>GOLIM4</i>   |                   | TRUE   | TRUE  | FALSE     |
| <i>SPPL2A</i>   |                   | TRUE   | FALSE | TRUE      |
| <i>CYP27B1</i>  |                   | TRUE   | TRUE  | FALSE     |
| <i>BCL2A1</i>   |                   | TRUE   | FALSE | TRUE      |
| <i>CYFIP1</i>   |                   | TRUE   | TRUE  | FALSE     |
| <i>SLC36A1</i>  |                   | TRUE   | TRUE  | TRUE      |
| <i>CRTAM</i>    |                   | TRUE   | TRUE  | FALSE     |
| <i>IPO11</i>    |                   | TRUE   | TRUE  | TRUE      |
| <i>IPO13</i>    |                   | TRUE   | TRUE  | TRUE      |
| <i>SRBD1</i>    |                   | TRUE   | TRUE  | FALSE     |
| <i>MCM10</i>    |                   | TRUE   | TRUE  | TRUE      |
| <i>AAGAB</i>    |                   | TRUE   | TRUE  | TRUE      |
| <i>XPNPEP1</i>  |                   | TRUE   | TRUE  | TRUE      |
| <i>ZNF57</i>    |                   | TRUE   | FALSE | FALSE     |
| <i>GGCT</i>     |                   | TRUE   | TRUE  | TRUE      |
| <i>IGFBP4</i>   |                   | TRUE   | FALSE | TRUE      |
| <i>EIF2B4</i>   |                   | TRUE   | TRUE  | TRUE      |
| <i>EIF2B3</i>   |                   | TRUE   | TRUE  | TRUE      |
| <i>EIF2B1</i>   |                   | TRUE   | FALSE | TRUE      |
| <i>KIAA0020</i> |                   | TRUE   | TRUE  | TRUE      |
| <i>TMEM141</i>  |                   | TRUE   | FALSE | FALSE     |
| <i>RTKN2</i>    |                   | TRUE   | FALSE | TRUE      |
| <i>VMP1</i>     |                   | TRUE   | TRUE  | TRUE      |
| <i>C19orf24</i> |                   | TRUE   | TRUE  | FALSE     |
| <i>MYBL2</i>    |                   | TRUE   | FALSE | FALSE     |
| <i>TIPIN</i>    |                   | TRUE   | TRUE  | TRUE      |
| <i>AP2A1</i>    |                   | TRUE   | TRUE  | FALSE     |
| <i>NSUN2</i>    |                   | TRUE   | FALSE | TRUE      |
| <i>TUBG1</i>    |                   | TRUE   | FALSE | TRUE      |

---

|                  |      |       |       |
|------------------|------|-------|-------|
| <i>TIMM44</i>    | TRUE | TRUE  | TRUE  |
| <i>RRP7A</i>     | TRUE | FALSE | TRUE  |
| <i>RRP7B</i>     | TRUE | FALSE | TRUE  |
| <i>SPG21</i>     | TRUE | FALSE | FALSE |
| <i>PTPN11</i>    | TRUE | TRUE  | TRUE  |
| <i>C16orf70</i>  | TRUE | TRUE  | TRUE  |
| <i>MRPL23</i>    | TRUE | FALSE | FALSE |
| <i>MRPL28</i>    | TRUE | FALSE | TRUE  |
| <i>NPTX1</i>     | TRUE | TRUE  | FALSE |
| <i>SRSF4</i>     | TRUE | TRUE  | TRUE  |
| <i>GID8</i>      | TRUE | FALSE | TRUE  |
| <i>ZNF583</i>    | TRUE | FALSE | TRUE  |
| <i>CAMKK2</i>    | TRUE | FALSE | TRUE  |
| <i>CTPS1</i>     | TRUE | TRUE  | TRUE  |
| <i>SRF</i>       | TRUE | FALSE | TRUE  |
| <i>SRI</i>       | TRUE | TRUE  | TRUE  |
| <i>SRM</i>       | TRUE | TRUE  | FALSE |
| <i>EIF2AK4</i>   | TRUE | TRUE  | TRUE  |
| <i>MYO19</i>     | TRUE | FALSE | FALSE |
| <i>FAM136A</i>   | TRUE | TRUE  | TRUE  |
| <i>MPDU1</i>     | TRUE | FALSE | TRUE  |
| <i>GCNT1</i>     | TRUE | FALSE | FALSE |
| <i>LPCAT1</i>    | TRUE | FALSE | TRUE  |
| <i>PIGU</i>      | TRUE | TRUE  | TRUE  |
| <i>RMND1</i>     | TRUE | TRUE  | TRUE  |
| <i>ANKLE1</i>    | TRUE | TRUE  | TRUE  |
| <i>ANKLE2</i>    | TRUE | TRUE  | TRUE  |
| <i>C9orf114</i>  | TRUE | FALSE | TRUE  |
| <i>SLC39A14</i>  | TRUE | TRUE  | TRUE  |
| <i>EIF1AD</i>    | TRUE | FALSE | TRUE  |
| <i>EVI5</i>      | TRUE | TRUE  | TRUE  |
| <i>NARFL</i>     | TRUE | TRUE  | TRUE  |
| <i>PTPMT1</i>    | TRUE | FALSE | TRUE  |
| <i>CENPBD1P1</i> | TRUE | FALSE | TRUE  |
| <i>DAG1</i>      | TRUE | TRUE  | TRUE  |
| <i>HELLS</i>     | TRUE | FALSE | TRUE  |
| <i>GGA1</i>      | TRUE | FALSE | TRUE  |
| <i>PKD2</i>      | TRUE | TRUE  | TRUE  |
| <i>SPRYD3</i>    | TRUE | FALSE | TRUE  |
| <i>PSMB5</i>     | TRUE | TRUE  | TRUE  |
| <i>PSMB2</i>     | TRUE | FALSE | TRUE  |
| <i>KCNK5</i>     | TRUE | FALSE | FALSE |
| <i>KCNK6</i>     | TRUE | FALSE | TRUE  |
| <i>MLH1</i>      | TRUE | TRUE  | TRUE  |

---

---

|                 |      |       |       |
|-----------------|------|-------|-------|
| <i>NUP160</i>   | TRUE | TRUE  | TRUE  |
| <i>GNA12</i>    | TRUE | FALSE | TRUE  |
| <i>GNA11</i>    | TRUE | FALSE | TRUE  |
| <i>CHTF18</i>   | TRUE | FALSE | FALSE |
| <i>BCAT2</i>    | TRUE | TRUE  | FALSE |
| <i>GTF2F2</i>   | TRUE | TRUE  | TRUE  |
| <i>EIF2A</i>    | TRUE | FALSE | TRUE  |
| <i>ODF2</i>     | TRUE | TRUE  | TRUE  |
| <i>RRP1B</i>    | TRUE | FALSE | TRUE  |
| <i>CCL20</i>    | TRUE | TRUE  | TRUE  |
| <i>MAP3K8</i>   | TRUE | FALSE | FALSE |
| <i>ACAT1</i>    | TRUE | TRUE  | TRUE  |
| <i>IVD</i>      | TRUE | TRUE  | TRUE  |
| <i>IL2RA</i>    | TRUE | FALSE | TRUE  |
| <i>IL2RB</i>    | TRUE | FALSE | TRUE  |
| <i>SLC37A3</i>  | TRUE | TRUE  | TRUE  |
| <i>CDK12</i>    | TRUE | FALSE | TRUE  |
| <i>GPR125</i>   | TRUE | TRUE  | FALSE |
| <i>NCL</i>      | TRUE | TRUE  | TRUE  |
| <i>SETD6</i>    | TRUE | TRUE  | TRUE  |
| <i>CCDC152</i>  | TRUE | TRUE  | TRUE  |
| <i>WRAP73</i>   | TRUE | TRUE  | TRUE  |
| <i>MTCH2</i>    | TRUE | FALSE | TRUE  |
| <i>RINL</i>     | TRUE | TRUE  | TRUE  |
| <i>ICMT</i>     | TRUE | FALSE | TRUE  |
| <i>EME1</i>     | TRUE | FALSE | TRUE  |
| <i>ATP6V0A2</i> | TRUE | TRUE  | TRUE  |
| <i>AAMP</i>     | TRUE | FALSE | TRUE  |
| <i>TTC26</i>    | TRUE | TRUE  | TRUE  |
| <i>DOT1L</i>    | TRUE | FALSE | TRUE  |
| <i>ENO1</i>     | TRUE | FALSE | FALSE |
| <i>ACOX3</i>    | TRUE | TRUE  | TRUE  |
| <i>NSMCE2</i>   | TRUE | FALSE | FALSE |
| <i>ARHGDI1</i>  | TRUE | FALSE | TRUE  |
| <i>NANP</i>     | TRUE | TRUE  | FALSE |
| <i>DDX21</i>    | TRUE | FALSE | TRUE  |
| <i>ZNF90</i>    | TRUE | TRUE  | FALSE |
| <i>TBX21</i>    | TRUE | TRUE  | TRUE  |
| <i>TACO1</i>    | TRUE | TRUE  | TRUE  |
| <i>TRUB1</i>    | TRUE | TRUE  | TRUE  |
| <i>TRUB2</i>    | TRUE | FALSE | TRUE  |
| <i>CCDC77</i>   | TRUE | TRUE  | TRUE  |
| <i>AAAS</i>     | TRUE | FALSE | TRUE  |
| <i>MANEAL</i>   | TRUE | TRUE  | TRUE  |

---

---

|                 |      |       |       |
|-----------------|------|-------|-------|
| <i>CDC16</i>    | TRUE | TRUE  | TRUE  |
| <i>MAP1S</i>    | TRUE | FALSE | TRUE  |
| <i>AGFG1</i>    | TRUE | FALSE | TRUE  |
| <i>ASNA1</i>    | TRUE | FALSE | FALSE |
| <i>SDR42E1</i>  | TRUE | FALSE | TRUE  |
| <i>PPCDC</i>    | TRUE | FALSE | TRUE  |
| <i>SLC43A3</i>  | TRUE | TRUE  | TRUE  |
| <i>SLC43A1</i>  | TRUE | TRUE  | TRUE  |
| <i>NAA10</i>    | TRUE | FALSE | FALSE |
| <i>RRP36</i>    | TRUE | FALSE | TRUE  |
| <i>RPA2</i>     | TRUE | FALSE | TRUE  |
| <i>UFD1L</i>    | TRUE | TRUE  | FALSE |
| <i>TPX2</i>     | TRUE | TRUE  | FALSE |
| <i>INPP4B</i>   | TRUE | FALSE | TRUE  |
| <i>MICAL2</i>   | TRUE | FALSE | FALSE |
| <i>ZNF367</i>   | TRUE | TRUE  | FALSE |
| <i>H2AFY</i>    | TRUE | FALSE | FALSE |
| <i>NCAPG2</i>   | TRUE | TRUE  | TRUE  |
| <i>NMD3</i>     | TRUE | FALSE | TRUE  |
| <i>MAP7D3</i>   | TRUE | TRUE  | TRUE  |
| <i>FOXP3</i>    | TRUE | TRUE  | TRUE  |
| <i>POLDIP2</i>  | TRUE | TRUE  | TRUE  |
| <i>GTDC1</i>    | TRUE | TRUE  | FALSE |
| <i>ALDH18A1</i> | TRUE | TRUE  | TRUE  |
| <i>CPNE7</i>    | TRUE | FALSE | FALSE |
| <i>SNRPA</i>    | TRUE | TRUE  | TRUE  |
| <i>ZDHHC16</i>  | TRUE | TRUE  | TRUE  |
| <i>PRKAG1</i>   | TRUE | TRUE  | TRUE  |
| <i>ESPL1</i>    | TRUE | FALSE | TRUE  |
| <i>LARP4</i>    | TRUE | TRUE  | TRUE  |
| <i>DDX49</i>    | TRUE | FALSE | TRUE  |
| <i>DDX41</i>    | TRUE | TRUE  | FALSE |
| <i>ZNF175</i>   | TRUE | TRUE  | TRUE  |
| <i>ELAVL1</i>   | TRUE | FALSE | TRUE  |
| <i>SETBP1</i>   | TRUE | FALSE | FALSE |
| <i>FARSB</i>    | TRUE | TRUE  | TRUE  |
| <i>NFIL3</i>    | TRUE | FALSE | TRUE  |
| <i>CCDC58</i>   | TRUE | FALSE | TRUE  |
| <i>SLC35B4</i>  | TRUE | TRUE  | TRUE  |
| <i>PELP1</i>    | TRUE | TRUE  | TRUE  |
| <i>CDC37</i>    | TRUE | FALSE | FALSE |
| <i>ALAS1</i>    | TRUE | TRUE  | TRUE  |
| <i>LONRF3</i>   | TRUE | TRUE  | TRUE  |
| <i>ANKRD16</i>  | TRUE | TRUE  | TRUE  |

---



---

|                |      |       |       |
|----------------|------|-------|-------|
| <i>CCNA2</i>   | TRUE | TRUE  | TRUE  |
| <i>ATP13A3</i> | TRUE | TRUE  | TRUE  |
| <i>SKA3</i>    | TRUE | TRUE  | FALSE |
| <i>DDRKG1</i>  | TRUE | FALSE | FALSE |
| <i>E2F5</i>    | TRUE | TRUE  | TRUE  |
| <i>RPGR</i>    | TRUE | FALSE | TRUE  |
| <i>URB2</i>    | TRUE | TRUE  | TRUE  |
| <i>URB1</i>    | TRUE | TRUE  | TRUE  |
| <i>EIF2B2</i>  | TRUE | TRUE  | TRUE  |
| <i>DFFA</i>    | TRUE | FALSE | TRUE  |
| <i>SEC24D</i>  | TRUE | FALSE | TRUE  |
| <i>SEC24A</i>  | TRUE | FALSE | TRUE  |
| <i>MRPL45</i>  | TRUE | TRUE  | TRUE  |
| <i>CCDC6</i>   | TRUE | TRUE  | TRUE  |
| <i>MTHFD2</i>  | TRUE | FALSE | TRUE  |
| <i>GMNN</i>    | TRUE | FALSE | TRUE  |
| <i>ZNF341</i>  | TRUE | TRUE  | TRUE  |
| <i>ABRACL</i>  | TRUE | FALSE | TRUE  |
| <i>ZNF432</i>  | TRUE | TRUE  | TRUE  |
| <i>NUDT19</i>  | TRUE | TRUE  | TRUE  |
| <i>DRG1</i>    | TRUE | FALSE | TRUE  |
| <i>NUP107</i>  | TRUE | TRUE  | TRUE  |
| <i>APIB1</i>   | TRUE | TRUE  | TRUE  |
| <i>TXLNA</i>   | TRUE | FALSE | TRUE  |
| <i>IL12RB2</i> | TRUE | TRUE  | TRUE  |
| <i>ACOT4</i>   | TRUE | FALSE | TRUE  |
| <i>ADCY3</i>   | TRUE | FALSE | FALSE |
| <i>KIF23</i>   | TRUE | FALSE | TRUE  |
| <i>RBBP4</i>   | TRUE | FALSE | TRUE  |
| <i>FAM208B</i> | TRUE | TRUE  | TRUE  |
| <i>PTPLAD1</i> | TRUE | FALSE | TRUE  |
| <i>C12orf4</i> | TRUE | TRUE  | TRUE  |
| <i>XRCC3</i>   | TRUE | TRUE  | TRUE  |
| <i>XRCC2</i>   | TRUE | TRUE  | TRUE  |
| <i>TFRC</i>    | TRUE | FALSE | TRUE  |
| <i>CTLA4</i>   | TRUE | TRUE  | FALSE |
| <i>TFR2</i>    | TRUE | FALSE | FALSE |
| <i>MIER2</i>   | TRUE | TRUE  | TRUE  |
| <i>LMNB2</i>   | TRUE | TRUE  | TRUE  |
| <i>LMNB1</i>   | TRUE | FALSE | TRUE  |
| <i>CD274</i>   | TRUE | FALSE | TRUE  |
| <i>NAMPT</i>   | TRUE | FALSE | TRUE  |
| <i>ACACA</i>   | TRUE | TRUE  | TRUE  |
| <i>PITRM1</i>  | TRUE | TRUE  | TRUE  |

---

---

|                 |      |       |       |
|-----------------|------|-------|-------|
| <i>SARS2</i>    | TRUE | FALSE | TRUE  |
| <i>GUSBP1</i>   | TRUE | TRUE  | TRUE  |
| <i>THUMPD2</i>  | TRUE | TRUE  | TRUE  |
| <i>NUP188</i>   | TRUE | TRUE  | TRUE  |
| <i>GTPBP4</i>   | TRUE | FALSE | TRUE  |
| <i>GTPBP3</i>   | TRUE | FALSE | FALSE |
| <i>BCL6</i>     | TRUE | TRUE  | FALSE |
| <i>PLK4</i>     | TRUE | TRUE  | TRUE  |
| <i>CSNK1G1</i>  | TRUE | TRUE  | TRUE  |
| <i>PCGF6</i>    | TRUE | TRUE  | TRUE  |
| <i>ELP6</i>     | TRUE | FALSE | TRUE  |
| <i>ELP5</i>     | TRUE | FALSE | TRUE  |
| <i>CCDC86</i>   | TRUE | FALSE | TRUE  |
| <i>PTGFRN</i>   | TRUE | TRUE  | TRUE  |
| <i>UBAP2</i>    | TRUE | TRUE  | TRUE  |
| <i>EBNA1BP2</i> | TRUE | TRUE  | TRUE  |
| <i>ZBTB32</i>   | TRUE | FALSE | TRUE  |
| <i>TMEM97</i>   | TRUE | FALSE | TRUE  |
| <i>SGTA</i>     | TRUE | FALSE | TRUE  |
| <i>PEX5</i>     | TRUE | TRUE  | TRUE  |
| <i>ME3</i>      | TRUE | TRUE  | FALSE |
| <i>ME2</i>      | TRUE | TRUE  | TRUE  |
| <i>MPZL2</i>    | TRUE | TRUE  | FALSE |
| <i>AURKAIP1</i> | TRUE | TRUE  | FALSE |
| <i>NFKB1B</i>   | TRUE | TRUE  | TRUE  |
| <i>PREP</i>     | TRUE | FALSE | TRUE  |
| <i>RNH1</i>     | TRUE | FALSE | FALSE |
| <i>CLPP</i>     | TRUE | FALSE | TRUE  |
| <i>CLPB</i>     | TRUE | TRUE  | TRUE  |
| <i>RRAGD</i>    | TRUE | FALSE | TRUE  |
| <i>GGT1</i>     | TRUE | TRUE  | FALSE |
| <i>MCOLN1</i>   | TRUE | FALSE | FALSE |
| <i>MCOLN2</i>   | TRUE | TRUE  | TRUE  |
| <i>STYXL1</i>   | TRUE | TRUE  | TRUE  |
| <i>CPM</i>      | TRUE | TRUE  | TRUE  |
| <i>IFT22</i>    | TRUE | TRUE  | TRUE  |
| <i>RNASEH1</i>  | TRUE | FALSE | TRUE  |
| <i>DUSP6</i>    | TRUE | FALSE | FALSE |
| <i>SDAD1</i>    | TRUE | TRUE  | TRUE  |
| <i>ATAD3B</i>   | TRUE | TRUE  | TRUE  |
| <i>GDI2</i>     | TRUE | FALSE | TRUE  |
| <i>ARL5A</i>    | TRUE | FALSE | TRUE  |
| <i>ERLIN1</i>   | TRUE | TRUE  | TRUE  |
| <i>WDR36</i>    | TRUE | FALSE | TRUE  |

---

---

|                 |      |       |       |
|-----------------|------|-------|-------|
| <i>IL15RA</i>   | TRUE | FALSE | TRUE  |
| <i>ABHD17C</i>  | TRUE | FALSE | TRUE  |
| <i>GIGYF2</i>   | TRUE | TRUE  | TRUE  |
| <i>ZFP69B</i>   | TRUE | TRUE  | TRUE  |
| <i>CDC6</i>     | TRUE | FALSE | TRUE  |
| <i>CDC7</i>     | TRUE | FALSE | TRUE  |
| <i>CRYZL1</i>   | TRUE | FALSE | TRUE  |
| <i>TFPT</i>     | TRUE | TRUE  | FALSE |
| <i>TM9SF4</i>   | TRUE | TRUE  | TRUE  |
| <i>COX5A</i>    | TRUE | FALSE | TRUE  |
| <i>TLL4</i>     | TRUE | FALSE | TRUE  |
| <i>SLC35F2</i>  | TRUE | TRUE  | TRUE  |
| <i>REXO4</i>    | TRUE | FALSE | TRUE  |
| <i>SLC25A12</i> | TRUE | TRUE  | TRUE  |
| <i>SLC25A10</i> | TRUE | TRUE  | FALSE |
| <i>NDUFA13</i>  | TRUE | FALSE | FALSE |
| <i>SYNCRIP</i>  | TRUE | TRUE  | TRUE  |
| <i>MMAA</i>     | TRUE | FALSE | TRUE  |
| <i>ALG8</i>     | TRUE | TRUE  | TRUE  |
| <i>ALG3</i>     | TRUE | FALSE | TRUE  |
| <i>CCNE2</i>    | TRUE | FALSE | TRUE  |
| <i>CCNE1</i>    | TRUE | TRUE  | TRUE  |
| <i>IRF4</i>     | TRUE | FALSE | TRUE  |
| <i>IRF8</i>     | TRUE | FALSE | TRUE  |
| <i>RUNDC1</i>   | TRUE | TRUE  | FALSE |
| <i>PANX1</i>    | TRUE | TRUE  | TRUE  |
| <i>TRIM69</i>   | TRUE | TRUE  | TRUE  |
| <i>MTOR</i>     | TRUE | TRUE  | TRUE  |
| <i>UNG</i>      | TRUE | TRUE  | TRUE  |
| <i>TRIT1</i>    | TRUE | TRUE  | TRUE  |
| <i>C2orf69</i>  | TRUE | FALSE | TRUE  |
| <i>SNHG15</i>   | TRUE | FALSE | TRUE  |
| <i>SNHG17</i>   | TRUE | FALSE | TRUE  |
| <i>SNHG16</i>   | TRUE | FALSE | TRUE  |
| <i>DHCR24</i>   | TRUE | FALSE | TRUE  |
| <i>HSF5</i>     | TRUE | TRUE  | FALSE |
| <i>RAPH1</i>    | TRUE | TRUE  | TRUE  |
| <i>PARK7</i>    | TRUE | FALSE | FALSE |
| <i>MDM2</i>     | TRUE | TRUE  | TRUE  |
| <i>SNRPD3</i>   | TRUE | FALSE | TRUE  |
| <i>SNRPD1</i>   | TRUE | TRUE  | TRUE  |
| <i>SYNGR2</i>   | TRUE | TRUE  | FALSE |
| <i>SLC25A15</i> | TRUE | TRUE  | TRUE  |
| <i>PC</i>       | TRUE | TRUE  | FALSE |

---

---

|                 |      |       |       |
|-----------------|------|-------|-------|
| <i>FAM174A</i>  | TRUE | FALSE | TRUE  |
| <i>FBL</i>      | TRUE | FALSE | FALSE |
| <i>DOHH</i>     | TRUE | TRUE  | TRUE  |
| <i>GCFC2</i>    | TRUE | TRUE  | TRUE  |
| <i>HPRT1</i>    | TRUE | TRUE  | FALSE |
| <i>PTPN6</i>    | TRUE | TRUE  | TRUE  |
| <i>FOSL1</i>    | TRUE | FALSE | TRUE  |
| <i>CD63</i>     | TRUE | FALSE | FALSE |
| <i>SHCBP1</i>   | TRUE | TRUE  | TRUE  |
| <i>WDR12</i>    | TRUE | TRUE  | TRUE  |
| <i>WDR18</i>    | TRUE | TRUE  | FALSE |
| <i>TIMM9</i>    | TRUE | TRUE  | TRUE  |
| <i>C1orf216</i> | TRUE | FALSE | TRUE  |
| <i>ZMYND19</i>  | TRUE | FALSE | TRUE  |
| <i>C10orf35</i> | TRUE | FALSE | TRUE  |
| <i>PKN3</i>     | TRUE | FALSE | FALSE |
| <i>TEX261</i>   | TRUE | TRUE  | TRUE  |
| <i>CRCP</i>     | TRUE | TRUE  | TRUE  |
| <i>KCTD17</i>   | TRUE | FALSE | TRUE  |
| <i>SLC25A32</i> | TRUE | TRUE  | TRUE  |
| <i>SLC25A39</i> | TRUE | FALSE | FALSE |
| <i>TUBA1C</i>   | TRUE | TRUE  | TRUE  |
| <i>TAF6</i>     | TRUE | FALSE | FALSE |
| <i>G6PD</i>     | TRUE | FALSE | FALSE |
| <i>HMOX1</i>    | TRUE | TRUE  | TRUE  |
| <i>NPLOC4</i>   | TRUE | TRUE  | TRUE  |
| <i>AP2M1</i>    | TRUE | TRUE  | FALSE |
| <i>MINA</i>     | TRUE | TRUE  | TRUE  |
| <i>SSRP1</i>    | TRUE | TRUE  | FALSE |
| <i>C1orf174</i> | TRUE | TRUE  | TRUE  |
| <i>RPIA</i>     | TRUE | TRUE  | TRUE  |
| <i>LRP12</i>    | TRUE | FALSE | TRUE  |
| <i>BBS4</i>     | TRUE | TRUE  | TRUE  |
| <i>AGL</i>      | TRUE | TRUE  | TRUE  |
| <i>NIPA1</i>    | TRUE | TRUE  | TRUE  |
| <i>CS</i>       | TRUE | FALSE | TRUE  |
| <i>SCFD2</i>    | TRUE | FALSE | FALSE |
| <i>PDCD10</i>   | TRUE | FALSE | TRUE  |
| <i>PDCD11</i>   | TRUE | TRUE  | TRUE  |
| <i>DIMT1</i>    | TRUE | TRUE  | TRUE  |
| <i>MEN1</i>     | TRUE | TRUE  | TRUE  |
| <i>ERI3</i>     | TRUE | TRUE  | FALSE |
| <i>ACLY</i>     | TRUE | TRUE  | TRUE  |
| <i>WSB2</i>     | TRUE | TRUE  | TRUE  |

---

---

|                  |      |       |       |
|------------------|------|-------|-------|
| <i>ANAPC1</i>    | TRUE | TRUE  | FALSE |
| <i>ANAPC7</i>    | TRUE | TRUE  | TRUE  |
| <i>PISD</i>      | TRUE | TRUE  | TRUE  |
| <i>PSMD14</i>    | TRUE | FALSE | TRUE  |
| <i>PSMD11</i>    | TRUE | FALSE | TRUE  |
| <i>PSMD12</i>    | TRUE | TRUE  | TRUE  |
| <i>UTP20</i>     | TRUE | TRUE  | TRUE  |
| <i>METTL2B</i>   | TRUE | TRUE  | TRUE  |
| <i>TELO2</i>     | TRUE | FALSE | FALSE |
| <i>ARF6</i>      | TRUE | FALSE | TRUE  |
| <i>RAB11FIP1</i> | TRUE | TRUE  | TRUE  |
| <i>FPGS</i>      | TRUE | FALSE | TRUE  |
| <i>FAR1</i>      | TRUE | TRUE  | FALSE |
| <i>WDR77</i>     | TRUE | TRUE  | TRUE  |
| <i>NQO1</i>      | TRUE | TRUE  | FALSE |
| <i>DOLPP1</i>    | TRUE | FALSE | TRUE  |
| <i>ELK1</i>      | TRUE | TRUE  | TRUE  |
| <i>C4orf27</i>   | TRUE | TRUE  | TRUE  |
| <i>TMEM194A</i>  | TRUE | TRUE  | TRUE  |
| <i>TMEM214</i>   | TRUE | TRUE  | TRUE  |
| <i>ANKRD13B</i>  | TRUE | FALSE | FALSE |
| <i>PPA1</i>      | TRUE | FALSE | FALSE |
| <i>FBXW9</i>     | TRUE | FALSE | TRUE  |
| <i>ETFA</i>      | TRUE | FALSE | TRUE  |
| <i>YKT6</i>      | TRUE | TRUE  | TRUE  |
| <i>BABAM1</i>    | TRUE | FALSE | FALSE |
| <i>SMARCA4</i>   | TRUE | TRUE  | FALSE |
| <i>PACRGL</i>    | TRUE | FALSE | TRUE  |
| <i>NLE1</i>      | TRUE | FALSE | TRUE  |
| <i>DPH2</i>      | TRUE | TRUE  | TRUE  |
| <i>GPAM</i>      | TRUE | TRUE  | TRUE  |
| <i>TAF4B</i>     | TRUE | TRUE  | TRUE  |
| <i>EIF4ENIF1</i> | TRUE | TRUE  | TRUE  |
| <i>CUL7</i>      | TRUE | TRUE  | TRUE  |
| <i>TRIM25</i>    | TRUE | FALSE | FALSE |
| <i>TRIM21</i>    | TRUE | FALSE | TRUE  |
| <i>GNPAT</i>     | TRUE | FALSE | TRUE  |
| <i>EDARADD</i>   | TRUE | TRUE  | TRUE  |
| <i>SP140</i>     | TRUE | FALSE | TRUE  |
| <i>GAPDH</i>     | TRUE | FALSE | FALSE |
| <i>DNAJC21</i>   | TRUE | FALSE | TRUE  |
| <i>DTD1</i>      | TRUE | TRUE  | TRUE  |
| <i>DTD2</i>      | TRUE | FALSE | TRUE  |
| <i>AEN</i>       | TRUE | FALSE | FALSE |

---

---

|                 |      |       |       |
|-----------------|------|-------|-------|
| <i>TMEM70</i>   | TRUE | FALSE | TRUE  |
| <i>MRPL4</i>    | TRUE | TRUE  | TRUE  |
| <i>MRPL3</i>    | TRUE | FALSE | TRUE  |
| <i>ZNF613</i>   | TRUE | TRUE  | TRUE  |
| <i>SLC3A2</i>   | TRUE | FALSE | TRUE  |
| <i>EIF4EBP1</i> | TRUE | FALSE | TRUE  |
| <i>BAG1</i>     | TRUE | FALSE | TRUE  |
| <i>BAG4</i>     | TRUE | FALSE | TRUE  |
| <i>GMFB</i>     | TRUE | TRUE  | TRUE  |
| <i>UTP11L</i>   | TRUE | FALSE | TRUE  |
| <i>CPSF3L</i>   | TRUE | TRUE  | FALSE |
| <i>ATXN10</i>   | TRUE | TRUE  | FALSE |
| <i>MRPS17</i>   | TRUE | FALSE | TRUE  |
| <i>ILVBL</i>    | TRUE | FALSE | TRUE  |
| <i>TSTA3</i>    | TRUE | FALSE | FALSE |
| <i>MAPKAP1</i>  | TRUE | TRUE  | FALSE |
| <i>NRDE2</i>    | TRUE | TRUE  | TRUE  |
| <i>CDK2AP1</i>  | TRUE | TRUE  | FALSE |
| <i>ZSCAN21</i>  | TRUE | TRUE  | TRUE  |
| <i>ZSCAN22</i>  | TRUE | FALSE | TRUE  |
| <i>MRPS5</i>    | TRUE | FALSE | TRUE  |
| <i>IFI35</i>    | TRUE | FALSE | FALSE |
| <i>MRPS2</i>    | TRUE | FALSE | TRUE  |
| <i>ABHD2</i>    | TRUE | TRUE  | TRUE  |
| <i>ABHD6</i>    | TRUE | TRUE  | TRUE  |
| <i>PA2G4</i>    | TRUE | TRUE  | TRUE  |
| <i>EIF4G3</i>   | TRUE | TRUE  | FALSE |
| <i>EIF4G1</i>   | TRUE | TRUE  | TRUE  |
| <i>POLR2D</i>   | TRUE | TRUE  | TRUE  |
| <i>POLR2F</i>   | TRUE | FALSE | FALSE |
| <i>POLR2H</i>   | TRUE | FALSE | TRUE  |
| <i>ASCC3</i>    | TRUE | FALSE | TRUE  |
| <i>AGO1</i>     | TRUE | TRUE  | TRUE  |
| <i>FAM120A</i>  | TRUE | TRUE  | TRUE  |
| <i>B3GALNT2</i> | TRUE | TRUE  | TRUE  |
| <i>MRTO4</i>    | TRUE | FALSE | TRUE  |
| <i>BCL2L14</i>  | TRUE | TRUE  | FALSE |
| <i>NUP43</i>    | TRUE | TRUE  | TRUE  |
| <i>CTU2</i>     | TRUE | TRUE  | TRUE  |
| <i>NCKAP1</i>   | TRUE | TRUE  | FALSE |
| <i>TARBP2</i>   | TRUE | TRUE  | TRUE  |
| <i>ATF3</i>     | TRUE | TRUE  | TRUE  |
| <i>PPAP2A</i>   | TRUE | FALSE | TRUE  |
| <i>SUMO3</i>    | TRUE | FALSE | FALSE |

---

---

|                |      |       |       |
|----------------|------|-------|-------|
| <i>EEF2K</i>   | TRUE | FALSE | TRUE  |
| <i>NADK2</i>   | TRUE | TRUE  | TRUE  |
| <i>SLC38A5</i> | TRUE | TRUE  | FALSE |
| <i>SLC38A7</i> | TRUE | FALSE | TRUE  |
| <i>YBX3</i>    | TRUE | FALSE | FALSE |
| <i>TNFRSF9</i> | TRUE | FALSE | TRUE  |
| <i>TNFRSF4</i> | TRUE | FALSE | FALSE |
| <i>FUNDC1</i>  | TRUE | TRUE  | TRUE  |
| <i>CEP170B</i> | TRUE | FALSE | FALSE |
| <i>DYNC1L1</i> | TRUE | FALSE | TRUE  |
| <i>ACP2</i>    | TRUE | FALSE | TRUE  |
| <i>ANKRD39</i> | TRUE | FALSE | TRUE  |
| <i>NT5C3B</i>  | TRUE | TRUE  | FALSE |
| <i>CISH</i>    | TRUE | FALSE | TRUE  |
| <i>SLC27A4</i> | TRUE | TRUE  | FALSE |
| <i>SLC27A2</i> | TRUE | TRUE  | TRUE  |
| <i>AK2</i>     | TRUE | FALSE | TRUE  |
| <i>RRP9</i>    | TRUE | FALSE | TRUE  |
| <i>BRMS1L</i>  | TRUE | FALSE | TRUE  |
| <i>MATK</i>    | TRUE | FALSE | FALSE |
| <i>KDM1B</i>   | TRUE | TRUE  | TRUE  |
| <i>IMPDH2</i>  | TRUE | TRUE  | FALSE |
| <i>MTMR4</i>   | TRUE | TRUE  | FALSE |
| <i>MTMR2</i>   | TRUE | TRUE  | TRUE  |
| <i>TRAIP</i>   | TRUE | TRUE  | TRUE  |
| <i>EXOSC8</i>  | TRUE | FALSE | TRUE  |
| <i>BCKDK</i>   | TRUE | FALSE | TRUE  |
| <i>EXOSC2</i>  | TRUE | FALSE | TRUE  |
| <i>EXOSC1</i>  | TRUE | FALSE | TRUE  |
| <i>EXOSC7</i>  | TRUE | FALSE | TRUE  |
| <i>STXBP1</i>  | TRUE | TRUE  | TRUE  |
| <i>NOC2L</i>   | TRUE | FALSE | TRUE  |
| <i>FANCE</i>   | TRUE | TRUE  | TRUE  |
| <i>FANCC</i>   | TRUE | FALSE | FALSE |
| <i>FANCA</i>   | TRUE | FALSE | FALSE |
| <i>HNRNPAB</i> | TRUE | TRUE  | TRUE  |
| <i>FANCI</i>   | TRUE | TRUE  | TRUE  |
| <i>KNSTRN</i>  | TRUE | TRUE  | TRUE  |
| <i>LRRFIP2</i> | TRUE | TRUE  | TRUE  |
| <i>CDK6</i>    | TRUE | FALSE | TRUE  |
| <i>CEP55</i>   | TRUE | FALSE | FALSE |
| <i>SCRIB</i>   | TRUE | FALSE | FALSE |
| <i>TYMS</i>    | TRUE | TRUE  | FALSE |
| <i>IARS</i>    | TRUE | TRUE  | TRUE  |

---

---

|                  |      |       |       |
|------------------|------|-------|-------|
| <i>CTSC</i>      | TRUE | TRUE  | TRUE  |
| <i>TOMM34</i>    | TRUE | FALSE | TRUE  |
| <i>PCYT1A</i>    | TRUE | FALSE | TRUE  |
| <i>STIL</i>      | TRUE | FALSE | TRUE  |
| <i>DCTD</i>      | TRUE | TRUE  | TRUE  |
| <i>PDP2</i>      | TRUE | TRUE  | TRUE  |
| <i>UBA2</i>      | TRUE | FALSE | TRUE  |
| <i>PWP2</i>      | TRUE | FALSE | TRUE  |
| <i>PWP1</i>      | TRUE | TRUE  | TRUE  |
| <i>NAA15</i>     | TRUE | TRUE  | TRUE  |
| <i>NRROS</i>     | TRUE | TRUE  | TRUE  |
| <i>TOP3A</i>     | TRUE | FALSE | TRUE  |
| <i>PNO1</i>      | TRUE | TRUE  | TRUE  |
| <i>TALDO1</i>    | TRUE | FALSE | FALSE |
| <i>BIRC5</i>     | TRUE | FALSE | FALSE |
| <i>CMAHP</i>     | TRUE | FALSE | TRUE  |
| <i>DHDDS</i>     | TRUE | TRUE  | TRUE  |
| <i>PARS2</i>     | TRUE | TRUE  | FALSE |
| <i>FAM221A</i>   | TRUE | TRUE  | TRUE  |
| <i>SEMA7A</i>    | TRUE | TRUE  | FALSE |
| <i>LIN9</i>      | TRUE | TRUE  | TRUE  |
| <i>ZNF212</i>    | TRUE | TRUE  | TRUE  |
| <i>ZWINT</i>     | TRUE | FALSE | FALSE |
| <i>NFKBID</i>    | TRUE | TRUE  | TRUE  |
| <i>C10orf128</i> | TRUE | FALSE | TRUE  |
| <i>KIAA0101</i>  | TRUE | FALSE | FALSE |
| <i>IPO4</i>      | TRUE | TRUE  | TRUE  |
| <i>IPO5</i>      | TRUE | FALSE | TRUE  |
| <i>DENND1A</i>   | TRUE | FALSE | TRUE  |
| <i>RAB8A</i>     | TRUE | FALSE | TRUE  |
| <i>GABPB1</i>    | TRUE | FALSE | TRUE  |
| <i>PAQR7</i>     | TRUE | FALSE | TRUE  |
| <i>FERMT3</i>    | TRUE | TRUE  | FALSE |
| <i>TOMM70A</i>   | TRUE | FALSE | TRUE  |
| <i>FADS1</i>     | TRUE | FALSE | FALSE |
| <i>CSE1L</i>     | TRUE | FALSE | TRUE  |
| <i>MAK16</i>     | TRUE | TRUE  | TRUE  |
| <i>KLHDC8B</i>   | TRUE | TRUE  | TRUE  |
| <i>ZNF324B</i>   | TRUE | TRUE  | TRUE  |
| <i>INPP1</i>     | TRUE | FALSE | TRUE  |
| <i>GFII</i>      | TRUE | TRUE  | TRUE  |
| <i>UNC45A</i>    | TRUE | FALSE | TRUE  |
| <i>BOD1</i>      | TRUE | FALSE | TRUE  |
| <i>ARHGEF10</i>  | TRUE | TRUE  | FALSE |

---



---

|                 |      |       |       |
|-----------------|------|-------|-------|
| <i>SF3A3</i>    | TRUE | TRUE  | TRUE  |
| <i>RHBDD3</i>   | TRUE | TRUE  | TRUE  |
| <i>CEP72</i>    | TRUE | TRUE  | TRUE  |
| <i>CHCHD6</i>   | TRUE | TRUE  | FALSE |
| <i>CHCHD4</i>   | TRUE | TRUE  | TRUE  |
| <i>SLC39A3</i>  | TRUE | FALSE | TRUE  |
| <i>GZMB</i>     | TRUE | TRUE  | FALSE |
| <i>MTHFD1L</i>  | TRUE | FALSE | FALSE |
| <i>GZMH</i>     | TRUE | TRUE  | TRUE  |
| <i>PIK3AP1</i>  | TRUE | TRUE  | TRUE  |
| <i>NOC4L</i>    | TRUE | FALSE | TRUE  |
| <i>CAD</i>      | TRUE | TRUE  | FALSE |
| <i>PGD</i>      | TRUE | TRUE  | TRUE  |
| <i>NUMBL</i>    | TRUE | TRUE  | TRUE  |
| <i>COA7</i>     | TRUE | FALSE | FALSE |
| <i>MRS2</i>     | TRUE | FALSE | TRUE  |
| <i>ARSB</i>     | TRUE | TRUE  | TRUE  |
| <i>PAFAH1B3</i> | TRUE | FALSE | FALSE |
| <i>ADAL</i>     | TRUE | TRUE  | TRUE  |
| <i>ZNF239</i>   | TRUE | TRUE  | TRUE  |
| <i>UBL4A</i>    | TRUE | FALSE | TRUE  |
| <i>ZNF232</i>   | TRUE | TRUE  | TRUE  |
| <i>RANBP1</i>   | TRUE | FALSE | TRUE  |
| <i>TXN2</i>     | TRUE | TRUE  | TRUE  |
| <i>HDGFRP2</i>  | TRUE | FALSE | FALSE |
| <i>YWHAQ</i>    | TRUE | FALSE | TRUE  |
| <i>ETS2</i>     | TRUE | FALSE | TRUE  |
| <i>CHST10</i>   | TRUE | FALSE | TRUE  |
| <i>AMICA1</i>   | TRUE | TRUE  | FALSE |
| <i>CAPRIN1</i>  | TRUE | TRUE  | TRUE  |
| <i>VRK1</i>     | TRUE | FALSE | TRUE  |
| <i>VRK2</i>     | TRUE | TRUE  | TRUE  |
| <i>SHMT2</i>    | TRUE | FALSE | TRUE  |
| <i>PLD6</i>     | TRUE | FALSE | TRUE  |
| <i>PPFIBP1</i>  | TRUE | TRUE  | TRUE  |
| <i>ATAD3A</i>   | TRUE | FALSE | TRUE  |
| <i>RRP1</i>     | TRUE | FALSE | TRUE  |
| <i>SAAL1</i>    | TRUE | FALSE | TRUE  |
| <i>PLCB3</i>    | TRUE | FALSE | TRUE  |
| <i>SEC13</i>    | TRUE | TRUE  | TRUE  |
| <i>MSMO1</i>    | TRUE | TRUE  | TRUE  |
| <i>RPP30</i>    | TRUE | FALSE | TRUE  |
| <i>FBXO5</i>    | TRUE | FALSE | TRUE  |
| <i>FBXO6</i>    | TRUE | FALSE | TRUE  |

---

---

|                  |      |       |       |
|------------------|------|-------|-------|
| <i>QSER1</i>     | TRUE | TRUE  | TRUE  |
| <i>RITA1</i>     | TRUE | TRUE  | TRUE  |
| <i>ATL3</i>      | TRUE | TRUE  | TRUE  |
| <i>PPIH</i>      | TRUE | FALSE | FALSE |
| <i>PPIF</i>      | TRUE | TRUE  | TRUE  |
| <i>C14orf1</i>   | TRUE | FALSE | TRUE  |
| <i>AP4E1</i>     | TRUE | TRUE  | TRUE  |
| <i>NCAPH2</i>    | TRUE | FALSE | FALSE |
| <i>COG2</i>      | TRUE | TRUE  | TRUE  |
| <i>C12orf43</i>  | TRUE | TRUE  | TRUE  |
| <i>C12orf45</i>  | TRUE | FALSE | TRUE  |
| <i>ANKRD52</i>   | TRUE | TRUE  | TRUE  |
| <i>AKR1A1</i>    | TRUE | TRUE  | FALSE |
| <i>EPT1</i>      | TRUE | FALSE | TRUE  |
| <i>NPRL3</i>     | TRUE | TRUE  | FALSE |
| <i>SIRT6</i>     | TRUE | FALSE | TRUE  |
| <i>PAK1IP1</i>   | TRUE | TRUE  | TRUE  |
| <i>HOPX</i>      | TRUE | FALSE | FALSE |
| <i>PHAX</i>      | TRUE | FALSE | TRUE  |
| <i>RBM28</i>     | TRUE | FALSE | TRUE  |
| <i>RFWD3</i>     | TRUE | FALSE | TRUE  |
| <i>TRMT1</i>     | TRUE | TRUE  | FALSE |
| <i>UGCG</i>      | TRUE | FALSE | TRUE  |
| <i>ARHGAP11A</i> | TRUE | TRUE  | TRUE  |
| <i>ARL1</i>      | TRUE | TRUE  | TRUE  |
| <i>ZNF257</i>    | TRUE | TRUE  | TRUE  |
| <i>RRM2</i>      | TRUE | FALSE | TRUE  |
| <i>NAGA</i>      | TRUE | TRUE  | TRUE  |
| <i>PVRL1</i>     | TRUE | FALSE | TRUE  |
| <i>VAC14</i>     | TRUE | FALSE | TRUE  |
| <i>ZFYVE21</i>   | TRUE | FALSE | TRUE  |
| <i>APRT</i>      | TRUE | TRUE  | FALSE |
| <i>C19orf57</i>  | TRUE | FALSE | TRUE  |
| <i>TNFSF14</i>   | TRUE | TRUE  | TRUE  |
| <i>SFXN4</i>     | TRUE | TRUE  | TRUE  |
| <i>SFXN2</i>     | TRUE | FALSE | TRUE  |
| <i>SFXN1</i>     | TRUE | TRUE  | TRUE  |
| <i>RWDD2B</i>    | TRUE | FALSE | TRUE  |
| <i>CCT5</i>      | TRUE | FALSE | TRUE  |
| <i>TIMM13</i>    | TRUE | TRUE  | TRUE  |
| <i>USMG5</i>     | TRUE | FALSE | FALSE |
| <i>KNTC1</i>     | TRUE | TRUE  | FALSE |
| <i>RNF20</i>     | TRUE | FALSE | TRUE  |
| <i>PCID2</i>     | TRUE | TRUE  | TRUE  |

---

---

|                  |      |       |       |
|------------------|------|-------|-------|
| <i>MOB1B</i>     | TRUE | TRUE  | TRUE  |
| <i>APOL1</i>     | TRUE | FALSE | TRUE  |
| <i>ATN1</i>      | TRUE | TRUE  | FALSE |
| <i>TNIP2</i>     | TRUE | FALSE | TRUE  |
| <i>TNIP1</i>     | TRUE | FALSE | TRUE  |
| <i>RPP14</i>     | TRUE | TRUE  | TRUE  |
| <i>GNPDA1</i>    | TRUE | TRUE  | TRUE  |
| <i>USP31</i>     | TRUE | TRUE  | TRUE  |
| <i>RAN</i>       | TRUE | TRUE  | TRUE  |
| <i>ST7</i>       | TRUE | TRUE  | TRUE  |
| <i>EXT2</i>      | TRUE | TRUE  | TRUE  |
| <i>ALDH5A1</i>   | TRUE | TRUE  | TRUE  |
| <i>SNX5</i>      | TRUE | FALSE | TRUE  |
| <i>TEFM</i>      | TRUE | TRUE  | TRUE  |
| <i>LINC00665</i> | TRUE | TRUE  | FALSE |
| <i>CCDC124</i>   | TRUE | FALSE | FALSE |
| <i>KHSRP</i>     | TRUE | FALSE | TRUE  |
| <i>TIMELESS</i>  | TRUE | TRUE  | FALSE |
| <i>RNF219</i>    | TRUE | FALSE | FALSE |
| <i>PKM</i>       | TRUE | FALSE | FALSE |
| <i>DLAT</i>      | TRUE | FALSE | TRUE  |
| <i>UHRF1BP1L</i> | TRUE | FALSE | TRUE  |
| <i>RNASEH2A</i>  | TRUE | FALSE | TRUE  |
| <i>DIEXF</i>     | TRUE | FALSE | TRUE  |
| <i>PGAM5</i>     | TRUE | TRUE  | TRUE  |
| <i>C1QBP</i>     | TRUE | TRUE  | TRUE  |
| <i>MED24</i>     | TRUE | TRUE  | FALSE |
| <i>LAMP3</i>     | TRUE | TRUE  | FALSE |
| <i>NAT10</i>     | TRUE | TRUE  | TRUE  |
| <i>NELFCD</i>    | TRUE | FALSE | FALSE |
| <i>RAD54L</i>    | TRUE | TRUE  | TRUE  |
| <i>PSME3</i>     | TRUE | FALSE | TRUE  |
| <i>HMGAI</i>     | TRUE | TRUE  | TRUE  |
| <i>FURIN</i>     | TRUE | FALSE | TRUE  |
| <i>EML2</i>      | TRUE | TRUE  | TRUE  |
| <i>GMPS</i>      | TRUE | TRUE  | TRUE  |
| <i>FAM98A</i>    | TRUE | TRUE  | TRUE  |
| <i>NOP14</i>     | TRUE | TRUE  | TRUE  |
| <i>C17orf51</i>  | TRUE | TRUE  | TRUE  |
| <i>C17orf53</i>  | TRUE | FALSE | FALSE |
| <i>TFDP1</i>     | TRUE | FALSE | FALSE |
| <i>MIS18A</i>    | TRUE | FALSE | TRUE  |
| <i>BCL7A</i>     | TRUE | FALSE | TRUE  |
| <i>MRPL15</i>    | TRUE | TRUE  | TRUE  |

---

---

|                 |      |       |       |
|-----------------|------|-------|-------|
| <i>LRP5</i>     | TRUE | TRUE  | FALSE |
| <i>LRP8</i>     | TRUE | FALSE | TRUE  |
| <i>MAP4</i>     | TRUE | TRUE  | FALSE |
| <i>MAP9</i>     | TRUE | FALSE | TRUE  |
| <i>THG1L</i>    | TRUE | FALSE | TRUE  |
| <i>GSS</i>      | TRUE | FALSE | FALSE |
| <i>GSR</i>      | TRUE | TRUE  | TRUE  |
| <i>LRPPRC</i>   | TRUE | TRUE  | TRUE  |
| <i>SMIM15</i>   | TRUE | TRUE  | TRUE  |
| <i>SERPINB8</i> | TRUE | FALSE | TRUE  |
| <i>PTBP1</i>    | TRUE | FALSE | TRUE  |
| <i>HK2</i>      | TRUE | FALSE | TRUE  |
| <i>PABPC4</i>   | TRUE | FALSE | FALSE |
| <i>EED</i>      | TRUE | FALSE | TRUE  |
| <i>MAPKAPK3</i> | TRUE | TRUE  | TRUE  |
| <i>PIK3R3</i>   | TRUE | TRUE  | TRUE  |
| <i>PIK3R2</i>   | TRUE | FALSE | TRUE  |
| <i>CTNBL1</i>   | TRUE | FALSE | FALSE |
| <i>FAM111B</i>  | TRUE | FALSE | TRUE  |
| <i>ARMC9</i>    | TRUE | TRUE  | FALSE |
| <i>IDE</i>      | TRUE | TRUE  | TRUE  |
| <i>TICAM1</i>   | TRUE | TRUE  | TRUE  |
| <i>POLD1</i>    | TRUE | TRUE  | FALSE |
| <i>POLD2</i>    | TRUE | TRUE  | FALSE |
| <i>SAV1</i>     | TRUE | FALSE | TRUE  |
| <i>CEP152</i>   | TRUE | TRUE  | TRUE  |
| <i>PDGFA</i>    | TRUE | FALSE | TRUE  |
| <i>LONP1</i>    | TRUE | FALSE | TRUE  |
| <i>ORC6</i>     | TRUE | FALSE | TRUE  |
| <i>ORC2</i>     | TRUE | TRUE  | TRUE  |
| <i>ORC3</i>     | TRUE | TRUE  | TRUE  |
| <i>ORC1</i>     | TRUE | TRUE  | TRUE  |
| <i>RCC1</i>     | TRUE | TRUE  | TRUE  |
| <i>ACTB</i>     | TRUE | FALSE | TRUE  |
| <i>SQLE</i>     | TRUE | FALSE | TRUE  |
| <i>NT5DC3</i>   | TRUE | FALSE | TRUE  |
| <i>KIAA1279</i> | TRUE | TRUE  | TRUE  |
| <i>SERBP1</i>   | TRUE | TRUE  | TRUE  |
| <i>NDUFAF6</i>  | TRUE | FALSE | TRUE  |
| <i>GDAP1</i>    | TRUE | FALSE | TRUE  |
| <i>PRKAR1B</i>  | TRUE | TRUE  | TRUE  |
| <i>NOL6</i>     | TRUE | TRUE  | TRUE  |
| <i>C19orf10</i> | TRUE | TRUE  | TRUE  |
| <i>CDC45</i>    | TRUE | FALSE | TRUE  |

---

---

|                 |      |       |       |
|-----------------|------|-------|-------|
| <i>DANCR</i>    | TRUE | FALSE | TRUE  |
| <i>CHAF1A</i>   | TRUE | TRUE  | TRUE  |
| <i>CHAF1B</i>   | TRUE | TRUE  | TRUE  |
| <i>CDCA7</i>    | TRUE | FALSE | TRUE  |
| <i>CDCA4</i>    | TRUE | TRUE  | TRUE  |
| <i>CDCA5</i>    | TRUE | TRUE  | FALSE |
| <i>TIMM50</i>   | TRUE | FALSE | TRUE  |
| <i>ALKBH3</i>   | TRUE | TRUE  | TRUE  |
| <i>SPRED2</i>   | TRUE | FALSE | TRUE  |
| <i>ZMPSTE24</i> | TRUE | FALSE | TRUE  |
| <i>MRPL37</i>   | TRUE | TRUE  | TRUE  |
| <i>MRPL35</i>   | TRUE | TRUE  | TRUE  |
| <i>MRPL30</i>   | TRUE | FALSE | TRUE  |
| <i>MRPL38</i>   | TRUE | FALSE | TRUE  |
| <i>MRPL39</i>   | TRUE | FALSE | TRUE  |
| <i>THOC5</i>    | TRUE | TRUE  | TRUE  |
| <i>WHSC1</i>    | TRUE | FALSE | TRUE  |
| <i>RECQL4</i>   | TRUE | FALSE | FALSE |
| <i>COPS6</i>    | TRUE | FALSE | FALSE |
| <i>ZNF598</i>   | TRUE | FALSE | TRUE  |
| <i>TKT</i>      | TRUE | FALSE | FALSE |
| <i>NLN</i>      | TRUE | TRUE  | TRUE  |
| <i>NUDT1</i>    | TRUE | FALSE | FALSE |
| <i>TK1</i>      | TRUE | FALSE | FALSE |
| <i>CELSR3</i>   | TRUE | TRUE  | TRUE  |
| <i>LRRC32</i>   | TRUE | TRUE  | TRUE  |
| <i>MFN2</i>     | TRUE | FALSE | TRUE  |
| <i>MAD2L2</i>   | TRUE | TRUE  | TRUE  |
| <i>UQCRH</i>    | TRUE | FALSE | FALSE |
| <i>GPS1</i>     | TRUE | FALSE | FALSE |
| <i>GLO1</i>     | TRUE | TRUE  | TRUE  |
| <i>COIL</i>     | TRUE | TRUE  | FALSE |
| <i>SLC15A4</i>  | TRUE | TRUE  | TRUE  |
| <i>RRAS2</i>    | TRUE | FALSE | TRUE  |
| <i>SLC31A2</i>  | TRUE | TRUE  | TRUE  |
| <i>CHEK1</i>    | TRUE | TRUE  | TRUE  |
| <i>GINS3</i>    | TRUE | TRUE  | TRUE  |
| <i>GINS4</i>    | TRUE | TRUE  | TRUE  |
| <i>C19orf48</i> | TRUE | FALSE | TRUE  |
| <i>CHCHD10</i>  | TRUE | FALSE | FALSE |
| <i>ZNF100</i>   | TRUE | TRUE  | TRUE  |
| <i>GUCD1</i>    | TRUE | TRUE  | TRUE  |
| <i>TRAFD1</i>   | TRUE | FALSE | TRUE  |
| <i>AGPAT9</i>   | TRUE | FALSE | TRUE  |

---

---

|                 |      |       |       |
|-----------------|------|-------|-------|
| <i>PEX10</i>    | TRUE | FALSE | TRUE  |
| <i>ODC1</i>     | TRUE | FALSE | TRUE  |
| <i>PPP1CC</i>   | TRUE | FALSE | TRUE  |
| <i>WBP4</i>     | TRUE | TRUE  | TRUE  |
| <i>PPP1R16A</i> | TRUE | FALSE | FALSE |
| <i>TMA16</i>    | TRUE | FALSE | TRUE  |
| <i>IL1R1</i>    | TRUE | TRUE  | TRUE  |
| <i>MRPL11</i>   | TRUE | FALSE | FALSE |
| <i>MRPL12</i>   | TRUE | FALSE | TRUE  |
| <i>CDC25A</i>   | TRUE | TRUE  | TRUE  |
| <i>RNF40</i>    | TRUE | TRUE  | TRUE  |
| <i>DCUN1D1</i>  | TRUE | FALSE | TRUE  |
| <i>DCUN1D3</i>  | TRUE | TRUE  | TRUE  |
| <i>ZNF827</i>   | TRUE | TRUE  | TRUE  |
| <i>KDSR</i>     | TRUE | FALSE | TRUE  |
| <i>POLE</i>     | TRUE | TRUE  | FALSE |
| <i>AIFM2</i>    | TRUE | TRUE  | TRUE  |
| <i>SACS</i>     | TRUE | TRUE  | TRUE  |
| <i>NBN</i>      | TRUE | TRUE  | TRUE  |
| <i>DNPEP</i>    | TRUE | FALSE | TRUE  |
| <i>SIAH2</i>    | TRUE | TRUE  | TRUE  |
| <i>CLPTMIL</i>  | TRUE | FALSE | FALSE |
| <i>PHLPP2</i>   | TRUE | FALSE | TRUE  |
| <i>DAPP1</i>    | TRUE | FALSE | TRUE  |
| <i>HSPBP1</i>   | TRUE | FALSE | TRUE  |
| <i>GSTP1</i>    | TRUE | FALSE | FALSE |
| <i>RMDN3</i>    | TRUE | FALSE | TRUE  |
| <i>LRRC59</i>   | TRUE | FALSE | FALSE |
| <i>ERRF11</i>   | TRUE | FALSE | TRUE  |
| <i>SMG9</i>     | TRUE | TRUE  | TRUE  |
| <i>GRWD1</i>    | TRUE | FALSE | TRUE  |
| <i>IFNG</i>     | TRUE | TRUE  | FALSE |
| <i>IFRD2</i>    | TRUE | FALSE | TRUE  |
| <i>TEX2</i>     | TRUE | TRUE  | FALSE |
| <i>STARD7</i>   | TRUE | FALSE | TRUE  |
| <i>IMPAD1</i>   | TRUE | FALSE | TRUE  |
| <i>TOMM6</i>    | TRUE | FALSE | FALSE |
| <i>GEMIN4</i>   | TRUE | TRUE  | TRUE  |
| <i>LARP1B</i>   | TRUE | FALSE | TRUE  |
| <i>LARS2</i>    | TRUE | TRUE  | TRUE  |
| <i>DDX10</i>    | TRUE | TRUE  | TRUE  |
| <i>DDX11</i>    | TRUE | TRUE  | TRUE  |
| <i>GJB6</i>     | TRUE | FALSE | TRUE  |
| <i>PSMC2</i>    | TRUE | FALSE | TRUE  |

---

---

|                  |      |       |       |
|------------------|------|-------|-------|
| <i>PSMC3</i>     | TRUE | FALSE | TRUE  |
| <i>TRIP10</i>    | TRUE | TRUE  | TRUE  |
| <i>FN3KRP</i>    | TRUE | TRUE  | TRUE  |
| <i>GRHPR</i>     | TRUE | TRUE  | FALSE |
| <i>EIF3B</i>     | TRUE | FALSE | TRUE  |
| <i>NOL10</i>     | TRUE | TRUE  | TRUE  |
| <i>NOL12</i>     | TRUE | FALSE | TRUE  |
| <i>NME6</i>      | TRUE | TRUE  | TRUE  |
| <i>HCCS</i>      | TRUE | TRUE  | TRUE  |
| <i>GTF2E2</i>    | TRUE | TRUE  | TRUE  |
| <i>PPP1R14B</i>  | TRUE | TRUE  | FALSE |
| <i>ALKBH8</i>    | TRUE | TRUE  | TRUE  |
| <i>VPS53</i>     | TRUE | TRUE  | TRUE  |
| <i>ALKBH2</i>    | TRUE | TRUE  | TRUE  |
| <i>DBF4B</i>     | TRUE | TRUE  | TRUE  |
| <i>PHB2</i>      | TRUE | FALSE | TRUE  |
| <i>MSH3</i>      | TRUE | TRUE  | TRUE  |
| <i>MSH6</i>      | TRUE | FALSE | TRUE  |
| <i>C16orf45</i>  | TRUE | FALSE | TRUE  |
| <i>PACSIN3</i>   | TRUE | FALSE | FALSE |
| <i>PM20D2</i>    | TRUE | TRUE  | TRUE  |
| <i>SAE1</i>      | TRUE | TRUE  | TRUE  |
| <i>NT5C</i>      | TRUE | FALSE | FALSE |
| <i>TOMM5</i>     | TRUE | FALSE | TRUE  |
| <i>CHERP</i>     | TRUE | FALSE | TRUE  |
| <i>NME4</i>      | TRUE | TRUE  | FALSE |
| <i>CLSPN</i>     | TRUE | FALSE | TRUE  |
| <i>CLUH</i>      | TRUE | FALSE | FALSE |
| <i>TBCE</i>      | TRUE | TRUE  | TRUE  |
| <i>UPF2</i>      | TRUE | TRUE  | TRUE  |
| <i>PHTF2</i>     | TRUE | TRUE  | TRUE  |
| <i>LINC00116</i> | TRUE | FALSE | TRUE  |
| <i>COMT</i>      | TRUE | FALSE | FALSE |
| <i>ARL6</i>      | TRUE | TRUE  | TRUE  |
| <i>COLGALT1</i>  | TRUE | FALSE | TRUE  |
| <i>TTF2</i>      | TRUE | TRUE  | TRUE  |
| <i>TTF1</i>      | TRUE | TRUE  | TRUE  |
| <i>PINX1</i>     | TRUE | TRUE  | TRUE  |
| <i>AEBP1</i>     | TRUE | TRUE  | FALSE |
| <i>LTA4H</i>     | TRUE | TRUE  | FALSE |
| <i>ANXA7</i>     | TRUE | FALSE | TRUE  |
| <i>MCM6</i>      | TRUE | FALSE | TRUE  |
| <i>MCM5</i>      | TRUE | TRUE  | FALSE |
| <i>MCM4</i>      | TRUE | FALSE | TRUE  |

---

---

|                 |      |       |       |
|-----------------|------|-------|-------|
| <i>MCM3</i>     | TRUE | FALSE | TRUE  |
| <i>DUSP18</i>   | TRUE | TRUE  | FALSE |
| <i>MCM9</i>     | TRUE | FALSE | TRUE  |
| <i>ZNF142</i>   | TRUE | TRUE  | TRUE  |
| <i>MBIP</i>     | TRUE | FALSE | TRUE  |
| <i>DDX31</i>    | TRUE | FALSE | FALSE |
| <i>COX8A</i>    | TRUE | FALSE | FALSE |
| <i>PFAS</i>     | TRUE | TRUE  | TRUE  |
| <i>C20orf27</i> | TRUE | TRUE  | TRUE  |
| <i>KCNN4</i>    | TRUE | TRUE  | TRUE  |
| <i>NIT2</i>     | TRUE | TRUE  | TRUE  |
| <i>MIS12</i>    | TRUE | TRUE  | TRUE  |
| <i>SLC25A43</i> | TRUE | TRUE  | FALSE |
| <i>PDZD8</i>    | TRUE | FALSE | TRUE  |
| <i>TNPO2</i>    | TRUE | TRUE  | TRUE  |
| <i>TNPO3</i>    | TRUE | FALSE | TRUE  |
| <i>MAPK6</i>    | TRUE | FALSE | TRUE  |
| <i>FDX1L</i>    | TRUE | TRUE  | TRUE  |
| <i>KCTD6</i>    | TRUE | FALSE | TRUE  |
| <i>C1orf109</i> | TRUE | TRUE  | TRUE  |
| <i>HCFC1</i>    | TRUE | FALSE | TRUE  |
| <i>FOXRED2</i>  | TRUE | FALSE | TRUE  |
| <i>FOXRED1</i>  | TRUE | TRUE  | FALSE |
| <i>ANP32B</i>   | TRUE | FALSE | TRUE  |
| <i>RPF2</i>     | TRUE | TRUE  | TRUE  |
| <i>ZNF689</i>   | TRUE | FALSE | TRUE  |
| <i>GRSF1</i>    | TRUE | TRUE  | TRUE  |
| <i>IQCG</i>     | TRUE | TRUE  | TRUE  |
| <i>GPR114</i>   | TRUE | TRUE  | TRUE  |
| <i>GPAA1</i>    | TRUE | TRUE  | FALSE |
| <i>NCAPD3</i>   | TRUE | TRUE  | TRUE  |
| <i>BLM</i>      | TRUE | TRUE  | TRUE  |
| <i>MMACHC</i>   | TRUE | FALSE | TRUE  |
| <i>ATXN2</i>    | TRUE | TRUE  | TRUE  |
| <i>RIOK1</i>    | TRUE | FALSE | TRUE  |
| <i>LTV1</i>     | TRUE | FALSE | TRUE  |
| <i>MDN1</i>     | TRUE | TRUE  | FALSE |
| <i>NHEJ1</i>    | TRUE | TRUE  | TRUE  |
| <i>CSF1</i>     | TRUE | TRUE  | TRUE  |
| <i>DDX55</i>    | TRUE | FALSE | TRUE  |
| <i>BUB1</i>     | TRUE | TRUE  | TRUE  |
| <i>PLA2G15</i>  | TRUE | TRUE  | TRUE  |
| <i>TMEM138</i>  | TRUE | TRUE  | TRUE  |
| <i>SPRY1</i>    | TRUE | FALSE | FALSE |

---



---

|                 |      |       |       |
|-----------------|------|-------|-------|
| <i>COASY</i>    | TRUE | FALSE | TRUE  |
| <i>CDKL1</i>    | TRUE | TRUE  | TRUE  |
| <i>MCMBP</i>    | TRUE | FALSE | TRUE  |
| <i>CKAP2L</i>   | TRUE | TRUE  | TRUE  |
| <i>NDUFS1</i>   | TRUE | FALSE | TRUE  |
| <i>NDUFS4</i>   | TRUE | FALSE | TRUE  |
| <i>KRI1</i>     | TRUE | TRUE  | TRUE  |
| <i>FIBP</i>     | TRUE | FALSE | FALSE |
| <i>CSTF2</i>    | TRUE | TRUE  | TRUE  |
| <i>PCCB</i>     | TRUE | FALSE | TRUE  |
| <i>LIMA1</i>    | TRUE | FALSE | TRUE  |
| <i>PNPO</i>     | TRUE | TRUE  | TRUE  |
| <i>HRAS</i>     | TRUE | TRUE  | FALSE |
| <i>ZNF132</i>   | TRUE | FALSE | TRUE  |
| <i>C16orf87</i> | TRUE | FALSE | TRUE  |
| <i>GPHN</i>     | TRUE | TRUE  | TRUE  |
| <i>AIMP2</i>    | TRUE | TRUE  | TRUE  |
| <i>VWA9</i>     | TRUE | FALSE | TRUE  |
| <i>CASP2</i>    | TRUE | FALSE | TRUE  |
| <i>CASP3</i>    | TRUE | FALSE | TRUE  |
| <i>LSG1</i>     | TRUE | TRUE  | TRUE  |
| <i>PICALM</i>   | TRUE | TRUE  | FALSE |
| <i>ANAPC13</i>  | TRUE | TRUE  | TRUE  |
| <i>MYC</i>      | TRUE | TRUE  | FALSE |
| <i>MYB</i>      | TRUE | TRUE  | FALSE |
| <i>ENTPD7</i>   | TRUE | TRUE  | TRUE  |
| <i>SNAPC4</i>   | TRUE | TRUE  | TRUE  |
| <i>SLC4A2</i>   | TRUE | FALSE | FALSE |
| <i>NPEPPS</i>   | TRUE | TRUE  | TRUE  |
| <i>KIF3B</i>    | TRUE | TRUE  | TRUE  |
| <i>VDR</i>      | TRUE | TRUE  | TRUE  |
| <i>SNUPN</i>    | TRUE | TRUE  | TRUE  |
| <i>PDSS1</i>    | TRUE | FALSE | TRUE  |
| <i>STOML2</i>   | TRUE | TRUE  | TRUE  |
| <i>LEPRE1</i>   | TRUE | TRUE  | TRUE  |
| <i>CDKN3</i>    | TRUE | FALSE | TRUE  |
| <i>LSM10</i>    | TRUE | FALSE | TRUE  |
| <i>LSM11</i>    | TRUE | TRUE  | TRUE  |
| <i>SGPL1</i>    | TRUE | TRUE  | TRUE  |
| <i>NOB1</i>     | TRUE | FALSE | TRUE  |
| <i>IL21-AS1</i> | TRUE | TRUE  | TRUE  |
| <i>IRAK1</i>    | TRUE | FALSE | TRUE  |
| <i>WDR5</i>     | TRUE | FALSE | TRUE  |
| <i>WDR4</i>     | TRUE | TRUE  | TRUE  |

---

---

|                 |      |       |       |
|-----------------|------|-------|-------|
| <i>POU2AF1</i>  | TRUE | TRUE  | TRUE  |
| <i>CCND1</i>    | TRUE | FALSE | TRUE  |
| <i>MSH2</i>     | TRUE | TRUE  | TRUE  |
| <i>SERPINE2</i> | TRUE | FALSE | FALSE |
| <i>CHRAC1</i>   | TRUE | FALSE | TRUE  |
| <i>PGM2</i>     | TRUE | FALSE | TRUE  |
| <i>ZDHHC6</i>   | TRUE | TRUE  | TRUE  |
| <i>C8orf37</i>  | TRUE | TRUE  | TRUE  |
| <i>KLHL26</i>   | TRUE | TRUE  | TRUE  |
| <i>SMS</i>      | TRUE | FALSE | TRUE  |
| <i>POLK</i>     | TRUE | TRUE  | TRUE  |
| <i>NDUFV3</i>   | TRUE | TRUE  | TRUE  |
| <i>NDUFV1</i>   | TRUE | FALSE | FALSE |
| <i>SIGMAR1</i>  | TRUE | TRUE  | TRUE  |
| <i>PRC1</i>     | TRUE | FALSE | TRUE  |
| <i>RPTOR</i>    | TRUE | FALSE | TRUE  |
| <i>ZNF649</i>   | TRUE | FALSE | TRUE  |
| <i>KPNB1</i>    | TRUE | TRUE  | TRUE  |
| <i>HUWE1</i>    | TRUE | TRUE  | FALSE |
| <i>UTP14A</i>   | TRUE | TRUE  | TRUE  |
| <i>HTATIP2</i>  | TRUE | TRUE  | TRUE  |
| <i>SLC29A1</i>  | TRUE | TRUE  | FALSE |
| <i>ERO1L</i>    | TRUE | FALSE | TRUE  |
| <i>CD70</i>     | TRUE | FALSE | TRUE  |
| <i>CD72</i>     | TRUE | TRUE  | FALSE |
| <i>RFC5</i>     | TRUE | TRUE  | TRUE  |
| <i>RFC4</i>     | TRUE | FALSE | TRUE  |
| <i>RFC3</i>     | TRUE | TRUE  | TRUE  |
| <i>RFC2</i>     | TRUE | TRUE  | TRUE  |
| <i>CBX3</i>     | TRUE | TRUE  | TRUE  |
| <i>FASTKD1</i>  | TRUE | TRUE  | TRUE  |
| <i>PSEN2</i>    | TRUE | FALSE | TRUE  |
| <i>KIF1B</i>    | TRUE | TRUE  | TRUE  |
| <i>KIF1C</i>    | TRUE | FALSE | TRUE  |
| <i>AATF</i>     | TRUE | TRUE  | TRUE  |
| <i>TPI1</i>     | TRUE | TRUE  | FALSE |
| <i>ERCC1</i>    | TRUE | TRUE  | TRUE  |
| <i>ERCC2</i>    | TRUE | TRUE  | FALSE |
| <i>MRPS15</i>   | TRUE | TRUE  | FALSE |
| <i>PFKP</i>     | TRUE | FALSE | FALSE |
| <i>SUZ12</i>    | TRUE | TRUE  | TRUE  |
| <i>WARS</i>     | TRUE | TRUE  | FALSE |
| <i>SEH1L</i>    | TRUE | TRUE  | TRUE  |
| <i>NCDN</i>     | TRUE | FALSE | TRUE  |

---

---

|                 |      |       |       |
|-----------------|------|-------|-------|
| <i>SLC25A22</i> | TRUE | FALSE | TRUE  |
| <i>SLC25A20</i> | TRUE | TRUE  | TRUE  |
| <i>CARM1</i>    | TRUE | TRUE  | TRUE  |
| <i>RPUSD4</i>   | TRUE | FALSE | TRUE  |
| <i>RPAP1</i>    | TRUE | TRUE  | TRUE  |
| <i>PSTPIP2</i>  | TRUE | TRUE  | TRUE  |
| <i>POFUT1</i>   | TRUE | TRUE  | TRUE  |
| <i>SNX10</i>    | TRUE | TRUE  | TRUE  |
| <i>ICAM1</i>    | TRUE | FALSE | TRUE  |
| <i>SMTN</i>     | TRUE | FALSE | FALSE |
| <i>TYW3</i>     | TRUE | TRUE  | TRUE  |
| <i>ARPC5L</i>   | TRUE | FALSE | TRUE  |
| <i>MAP4K5</i>   | TRUE | FALSE | TRUE  |
| <i>MIR17HG</i>  | TRUE | FALSE | FALSE |
| <i>NCKIPSD</i>  | TRUE | FALSE | TRUE  |
| <i>PDCD2L</i>   | TRUE | FALSE | TRUE  |
| <i>SUV39H2</i>  | TRUE | FALSE | TRUE  |
| <i>CYC1</i>     | TRUE | FALSE | TRUE  |
| <i>BCL2L1</i>   | TRUE | TRUE  | TRUE  |
| <i>SCO1</i>     | TRUE | FALSE | TRUE  |
| <i>SPINT1</i>   | TRUE | FALSE | TRUE  |
| <i>YBEY</i>     | TRUE | TRUE  | TRUE  |
| <i>C7orf49</i>  | TRUE | FALSE | TRUE  |
| <i>TDP1</i>     | TRUE | TRUE  | TRUE  |
| <i>L3MBTL2</i>  | TRUE | TRUE  | TRUE  |
| <i>C9orf3</i>   | TRUE | FALSE | TRUE  |
| <i>TMED2</i>    | TRUE | FALSE | TRUE  |
| <i>ARPP19</i>   | TRUE | TRUE  | TRUE  |
| <i>HNRNPR</i>   | TRUE | TRUE  | TRUE  |
| <i>HNRNPF</i>   | TRUE | TRUE  | TRUE  |
| <i>ZBTB45</i>   | TRUE | TRUE  | TRUE  |
| <i>PDIA6</i>    | TRUE | FALSE | TRUE  |
| <i>ARMC6</i>    | TRUE | TRUE  | TRUE  |
| <i>CD226</i>    | TRUE | TRUE  | TRUE  |
| <i>ZDHHC18</i>  | TRUE | TRUE  | TRUE  |
| <i>CEP83</i>    | TRUE | TRUE  | TRUE  |
| <i>CEP85</i>    | TRUE | TRUE  | TRUE  |
| <i>PTRH2</i>    | TRUE | TRUE  | FALSE |
| <i>NTHL1</i>    | TRUE | FALSE | FALSE |
| <i>GTF3C6</i>   | TRUE | FALSE | TRUE  |
| <i>XPO1</i>     | TRUE | TRUE  | TRUE  |
| <i>XPO5</i>     | TRUE | TRUE  | TRUE  |
| <i>XPO7</i>     | TRUE | TRUE  | TRUE  |
| <i>GARI</i>     | TRUE | TRUE  | TRUE  |

---

---

|                 |      |       |       |
|-----------------|------|-------|-------|
| <i>XPOT</i>     | TRUE | TRUE  | TRUE  |
| <i>GART</i>     | TRUE | TRUE  | TRUE  |
| <i>ATAD5</i>    | TRUE | TRUE  | TRUE  |
| <i>ATAD2</i>    | TRUE | FALSE | TRUE  |
| <i>TMEM192</i>  | TRUE | FALSE | TRUE  |
| <i>MTIF2</i>    | TRUE | FALSE | FALSE |
| <i>PRIM1</i>    | TRUE | TRUE  | TRUE  |
| <i>TTC27</i>    | TRUE | TRUE  | TRUE  |
| <i>ENOPH1</i>   | TRUE | TRUE  | TRUE  |
| <i>SRPK1</i>    | TRUE | TRUE  | TRUE  |
| <i>LARP1</i>    | TRUE | TRUE  | TRUE  |
| <i>NOLC1</i>    | TRUE | TRUE  | TRUE  |
| <i>THAP3</i>    | TRUE | TRUE  | TRUE  |
| <i>CHID1</i>    | TRUE | FALSE | FALSE |
| <i>PES1</i>     | TRUE | TRUE  | TRUE  |
| <i>ASB2</i>     | TRUE | TRUE  | TRUE  |
| <i>ATP5SL</i>   | TRUE | FALSE | TRUE  |
| <i>TBL3</i>     | TRUE | FALSE | FALSE |
| <i>DBI</i>      | TRUE | FALSE | FALSE |
| <i>MED9</i>     | TRUE | FALSE | TRUE  |
| <i>SDF2L1</i>   | TRUE | TRUE  | TRUE  |
| <i>PPP5C</i>    | TRUE | TRUE  | TRUE  |
| <i>NUTF2</i>    | TRUE | FALSE | FALSE |
| <i>CHPT1</i>    | TRUE | TRUE  | FALSE |
| <i>UTP15</i>    | TRUE | TRUE  | TRUE  |
| <i>DPAGT1</i>   | TRUE | TRUE  | FALSE |
| <i>SEPHS1</i>   | TRUE | TRUE  | TRUE  |
| <i>TET2</i>     | TRUE | FALSE | TRUE  |
| <i>BUD13</i>    | TRUE | FALSE | TRUE  |
| <i>PRDX4</i>    | TRUE | FALSE | TRUE  |
| <i>PRDX3</i>    | TRUE | TRUE  | TRUE  |
| <i>PRDX2</i>    | TRUE | FALSE | FALSE |
| <i>OTUB1</i>    | TRUE | FALSE | TRUE  |
| <i>NPTN</i>     | TRUE | TRUE  | TRUE  |
| <i>DCAF4</i>    | TRUE | TRUE  | TRUE  |
| <i>CD38</i>     | TRUE | TRUE  | TRUE  |
| <i>POLR3D</i>   | TRUE | TRUE  | TRUE  |
| <i>POLR3A</i>   | TRUE | TRUE  | TRUE  |
| <i>WDR62</i>    | TRUE | FALSE | TRUE  |
| <i>PRMT3</i>    | TRUE | TRUE  | TRUE  |
| <i>TONSL</i>    | TRUE | TRUE  | FALSE |
| <i>HMGCR</i>    | TRUE | FALSE | TRUE  |
| <i>MTPAP</i>    | TRUE | FALSE | TRUE  |
| <i>PPARGC1B</i> | TRUE | FALSE | TRUE  |

---

---

|                 |      |       |       |
|-----------------|------|-------|-------|
| <i>ACAD9</i>    | TRUE | FALSE | TRUE  |
| <i>VDAC3</i>    | TRUE | FALSE | TRUE  |
| <i>TMEM201</i>  | TRUE | FALSE | TRUE  |
| <i>TMEM209</i>  | TRUE | TRUE  | TRUE  |
| <i>HMGCS1</i>   | TRUE | TRUE  | TRUE  |
| <i>GALM</i>     | TRUE | TRUE  | TRUE  |
| <i>PRICKLE3</i> | TRUE | FALSE | TRUE  |
| <i>ATG7</i>     | TRUE | FALSE | FALSE |
| <i>VEZT</i>     | TRUE | FALSE | TRUE  |
| <i>ABCB6</i>    | TRUE | TRUE  | FALSE |
| <i>FEN1</i>     | TRUE | FALSE | TRUE  |
| <i>SCD</i>      | TRUE | FALSE | TRUE  |
| <i>STRIP2</i>   | TRUE | TRUE  | TRUE  |
| <i>TMEM64</i>   | TRUE | TRUE  | TRUE  |
| <i>TMEM69</i>   | TRUE | FALSE | TRUE  |
| <i>OGFOD1</i>   | TRUE | TRUE  | TRUE  |
| <i>ZNF629</i>   | TRUE | TRUE  | TRUE  |
| <i>NEURL4</i>   | TRUE | TRUE  | TRUE  |
| <i>BRE</i>      | TRUE | FALSE | FALSE |
| <i>NCSI</i>     | TRUE | FALSE | TRUE  |
| <i>TRAF2</i>    | TRUE | TRUE  | TRUE  |
| <i>CPOX</i>     | TRUE | TRUE  | TRUE  |
| <i>DKC1</i>     | TRUE | TRUE  | TRUE  |
| <i>COMMD1</i>   | TRUE | TRUE  | FALSE |
| <i>RUVBL2</i>   | TRUE | FALSE | TRUE  |
| <i>COMMD4</i>   | TRUE | FALSE | FALSE |
| <i>COMMD5</i>   | TRUE | TRUE  | FALSE |
| <i>ZMYM4</i>    | TRUE | TRUE  | FALSE |
| <i>CAMK2D</i>   | TRUE | TRUE  | TRUE  |
| <i>DEPDC1B</i>  | TRUE | TRUE  | TRUE  |
| <i>ASCC2</i>    | TRUE | TRUE  | TRUE  |
| <i>POLR1B</i>   | TRUE | TRUE  | TRUE  |
| <i>POLR1E</i>   | TRUE | FALSE | TRUE  |
| <i>WDR41</i>    | TRUE | TRUE  | TRUE  |
| <i>DUS1L</i>    | TRUE | FALSE | FALSE |
| <i>WDR43</i>    | TRUE | FALSE | TRUE  |
| <i>JAK2</i>     | TRUE | TRUE  | TRUE  |
| <i>GTF2I</i>    | TRUE | TRUE  | TRUE  |
| <i>PRKDC</i>    | TRUE | TRUE  | TRUE  |
| <i>DYRK3</i>    | TRUE | FALSE | TRUE  |
| <i>NR2F6</i>    | TRUE | TRUE  | TRUE  |
| <i>POLR2K</i>   | TRUE | FALSE | TRUE  |
| <i>MCAT</i>     | TRUE | FALSE | TRUE  |
| <i>MCM2</i>     | TRUE | FALSE | TRUE  |

---

---

|                 |      |       |       |
|-----------------|------|-------|-------|
| <i>APOBEC3C</i> | TRUE | FALSE | TRUE  |
| <i>CTTN</i>     | TRUE | FALSE | TRUE  |
| <i>EIF2S1</i>   | TRUE | FALSE | TRUE  |
| <i>GPI</i>      | TRUE | TRUE  | FALSE |
| <i>SLC1A5</i>   | TRUE | FALSE | TRUE  |
| <i>DCTPP1</i>   | TRUE | FALSE | TRUE  |
| <i>GNL2</i>     | TRUE | FALSE | TRUE  |
| <i>RARG</i>     | TRUE | TRUE  | TRUE  |
| <i>RARS</i>     | TRUE | TRUE  | TRUE  |
| <i>BAZ1B</i>    | TRUE | TRUE  | TRUE  |
| <i>SLC2A1</i>   | TRUE | TRUE  | TRUE  |
| <i>ECHS1</i>    | TRUE | FALSE | FALSE |
| <i>PLAGL2</i>   | TRUE | TRUE  | TRUE  |
| <i>EXO1</i>     | TRUE | TRUE  | TRUE  |
| <i>ATRIP</i>    | TRUE | TRUE  | TRUE  |
| <i>PARP2</i>    | TRUE | TRUE  | TRUE  |
| <i>ENG</i>      | TRUE | TRUE  | FALSE |
| <i>MREG</i>     | TRUE | TRUE  | TRUE  |
| <i>AGMAT</i>    | TRUE | FALSE | TRUE  |
| <i>TRNAUIAP</i> | TRUE | FALSE | TRUE  |
| <i>FLT1</i>     | TRUE | TRUE  | TRUE  |
| <i>SET</i>      | TRUE | FALSE | TRUE  |
| <i>RCL1</i>     | TRUE | TRUE  | TRUE  |
| <i>CHAMP1</i>   | TRUE | TRUE  | TRUE  |
| <i>PNPT1</i>    | TRUE | TRUE  | TRUE  |
| <i>SF3B3</i>    | TRUE | FALSE | TRUE  |
| <i>NSMCE4A</i>  | TRUE | FALSE | TRUE  |
| <i>ELAC1</i>    | TRUE | TRUE  | TRUE  |
| <i>ELAC2</i>    | TRUE | TRUE  | TRUE  |
| <i>ADCK1</i>    | TRUE | TRUE  | FALSE |
| <i>DNAJC16</i>  | TRUE | TRUE  | TRUE  |
| <i>DNAJC17</i>  | TRUE | FALSE | FALSE |
| <i>DNAJC10</i>  | TRUE | TRUE  | TRUE  |
| <i>DNAJC11</i>  | TRUE | TRUE  | TRUE  |
| <i>ASF1B</i>    | TRUE | TRUE  | TRUE  |
| <i>SUPT16H</i>  | TRUE | TRUE  | TRUE  |
| <i>LMAN1</i>    | TRUE | TRUE  | TRUE  |
| <i>MLX</i>      | TRUE | FALSE | TRUE  |
| <i>ITPA</i>     | TRUE | TRUE  | FALSE |
| <i>ACTG1</i>    | TRUE | FALSE | TRUE  |
| <i>PRPF31</i>   | TRUE | FALSE | FALSE |
| <i>SURF4</i>    | TRUE | FALSE | TRUE  |
| <i>PRSS23</i>   | TRUE | TRUE  | FALSE |
| <i>SURF6</i>    | TRUE | TRUE  | TRUE  |

---

---

|                 |      |       |       |
|-----------------|------|-------|-------|
| <i>ZNF485</i>   | TRUE | TRUE  | FALSE |
| <i>TP53</i>     | TRUE | FALSE | TRUE  |
| <i>SHQ1</i>     | TRUE | TRUE  | TRUE  |
| <i>DUS3L</i>    | TRUE | FALSE | TRUE  |
| <i>C5orf30</i>  | TRUE | TRUE  | TRUE  |
| <i>FARSA</i>    | TRUE | FALSE | TRUE  |
| <i>DPP9</i>     | TRUE | TRUE  | TRUE  |
| <i>DPP3</i>     | TRUE | FALSE | FALSE |
| <i>KNOP1</i>    | TRUE | FALSE | FALSE |
| <i>PHF5A</i>    | TRUE | TRUE  | TRUE  |
| <i>NOC3L</i>    | TRUE | TRUE  | TRUE  |
| <i>TRMT61A</i>  | TRUE | FALSE | TRUE  |
| <i>GOT2</i>     | TRUE | TRUE  | TRUE  |
| <i>RPP40</i>    | TRUE | FALSE | TRUE  |
| <i>QTRT1</i>    | TRUE | FALSE | FALSE |
| <i>SMIM20</i>   | TRUE | TRUE  | TRUE  |
| <i>ADRM1</i>    | TRUE | FALSE | TRUE  |
| <i>ZNF562</i>   | TRUE | TRUE  | TRUE  |
| <i>TRAF4</i>    | TRUE | FALSE | TRUE  |
| <i>UBE3C</i>    | TRUE | TRUE  | TRUE  |
| <i>TOP2A</i>    | TRUE | TRUE  | TRUE  |
| <i>KIAA0368</i> | TRUE | TRUE  | TRUE  |
| <i>C16orf91</i> | TRUE | TRUE  | FALSE |
| <i>SDC4</i>     | TRUE | FALSE | TRUE  |
| <i>ELOVL6</i>   | TRUE | TRUE  | TRUE  |
| <i>HTT</i>      | TRUE | FALSE | FALSE |
| <i>ELOVL1</i>   | TRUE | FALSE | TRUE  |
| <i>NAA25</i>    | TRUE | TRUE  | TRUE  |
| <i>KIAA1586</i> | TRUE | TRUE  | TRUE  |
| <i>DUSP5</i>    | TRUE | FALSE | FALSE |
| <i>DUSP4</i>    | TRUE | FALSE | TRUE  |
| <i>LRRC8B</i>   | TRUE | TRUE  | FALSE |
| <i>QDPR</i>     | TRUE | FALSE | TRUE  |
| <i>RDX</i>      | TRUE | TRUE  | TRUE  |
| <i>XYLB</i>     | TRUE | TRUE  | FALSE |
| <i>NEK6</i>     | TRUE | FALSE | TRUE  |
| <i>TMEM106C</i> | TRUE | TRUE  | TRUE  |
| <i>NPM1</i>     | TRUE | TRUE  | FALSE |
| <i>PEMT</i>     | TRUE | FALSE | FALSE |
| <i>DDX54</i>    | TRUE | FALSE | TRUE  |
| <i>BYSL</i>     | TRUE | FALSE | TRUE  |
| <i>SQRDL</i>    | TRUE | FALSE | TRUE  |
| <i>SCCPDH</i>   | TRUE | TRUE  | FALSE |
| <i>STAMBPL1</i> | TRUE | TRUE  | TRUE  |

---

---

|                |      |       |       |
|----------------|------|-------|-------|
| <i>CNDP2</i>   | TRUE | TRUE  | TRUE  |
| <i>TTI2</i>    | TRUE | FALSE | TRUE  |
| <i>TTI1</i>    | TRUE | TRUE  | TRUE  |
| <i>TXNRD1</i>  | TRUE | FALSE | TRUE  |
| <i>QSOX2</i>   | TRUE | FALSE | TRUE  |
| <i>PDS5B</i>   | TRUE | FALSE | TRUE  |
| <i>TADA2A</i>  | TRUE | TRUE  | TRUE  |
| <i>NR2C2AP</i> | TRUE | FALSE | TRUE  |
| <i>PAICS</i>   | TRUE | TRUE  | TRUE  |
| <i>VEGFA</i>   | TRUE | TRUE  | FALSE |
| <i>EMC1</i>    | TRUE | FALSE | TRUE  |
| <i>OTUD4</i>   | TRUE | FALSE | TRUE  |
| <i>ARID5B</i>  | TRUE | FALSE | FALSE |
| <i>ACER3</i>   | TRUE | FALSE | TRUE  |
| <i>EXOC2</i>   | TRUE | TRUE  | TRUE  |
| <i>EXOC3</i>   | TRUE | TRUE  | TRUE  |
| <i>ANK3</i>    | TRUE | FALSE | TRUE  |
| <i>C9orf91</i> | TRUE | TRUE  | TRUE  |
| <i>RAD18</i>   | TRUE | FALSE | TRUE  |
| <i>CENPO</i>   | TRUE | FALSE | TRUE  |
| <i>CENPN</i>   | TRUE | FALSE | TRUE  |
| <i>CENPI</i>   | TRUE | TRUE  | FALSE |
| <i>CENPH</i>   | TRUE | TRUE  | FALSE |
| <i>CENPV</i>   | TRUE | FALSE | TRUE  |
| <i>CENPU</i>   | TRUE | FALSE | TRUE  |
| <i>SLC9B2</i>  | TRUE | FALSE | TRUE  |
| <i>TRIB1</i>   | TRUE | FALSE | FALSE |
| <i>DHX30</i>   | TRUE | TRUE  | TRUE  |
| <i>DHX33</i>   | TRUE | TRUE  | TRUE  |
| <i>DHX34</i>   | TRUE | FALSE | TRUE  |
| <i>DHX35</i>   | TRUE | TRUE  | TRUE  |
| <i>DHX37</i>   | TRUE | FALSE | TRUE  |
| <i>PRIM2</i>   | TRUE | FALSE | FALSE |
| <i>RACGAP1</i> | TRUE | TRUE  | TRUE  |
| <i>PUS7</i>    | TRUE | TRUE  | TRUE  |
| <i>TANGO6</i>  | TRUE | FALSE | TRUE  |
| <i>KEAP1</i>   | TRUE | FALSE | TRUE  |
| <i>ZBTB8OS</i> | TRUE | FALSE | FALSE |
| <i>POLA2</i>   | TRUE | TRUE  | TRUE  |
| <i>PHF13</i>   | TRUE | FALSE | FALSE |
| <i>EZH2</i>    | TRUE | FALSE | TRUE  |
| <i>RAVER1</i>  | TRUE | FALSE | TRUE  |
| <i>CASC5</i>   | TRUE | FALSE | TRUE  |
| <i>MYEOV2</i>  | TRUE | FALSE | FALSE |

---



---

|                  |      |       |       |
|------------------|------|-------|-------|
| <i>BOLA3</i>     | TRUE | FALSE | TRUE  |
| <i>ZW10</i>      | TRUE | FALSE | TRUE  |
| <i>LINC00944</i> | TRUE | TRUE  | TRUE  |
| <i>MRRF</i>      | TRUE | TRUE  | TRUE  |
| <i>PHB</i>       | TRUE | FALSE | FALSE |
| <i>SNHG1</i>     | TRUE | FALSE | FALSE |
| <i>MED22</i>     | TRUE | TRUE  | TRUE  |
| <i>PARP1</i>     | TRUE | TRUE  | TRUE  |
| <i>PTPDC1</i>    | TRUE | TRUE  | FALSE |
| <i>MELK</i>      | TRUE | TRUE  | TRUE  |
| <i>DSN1</i>      | TRUE | FALSE | TRUE  |
| <i>SLC10A7</i>   | TRUE | TRUE  | TRUE  |
| <i>THOP1</i>     | TRUE | FALSE | TRUE  |
| <i>ABCF2</i>     | TRUE | TRUE  | TRUE  |
| <i>HMGXB3</i>    | TRUE | TRUE  | TRUE  |
| <i>HMGXB4</i>    | TRUE | TRUE  | TRUE  |
| <i>DNA2</i>      | TRUE | TRUE  | TRUE  |
| <i>GLRX5</i>     | TRUE | FALSE | TRUE  |
| <i>GLRX3</i>     | TRUE | FALSE | TRUE  |
| <i>C19orf44</i>  | TRUE | TRUE  | TRUE  |
| <i>C19orf47</i>  | TRUE | FALSE | TRUE  |
| <i>KLHL8</i>     | TRUE | FALSE | FALSE |
| <i>CIRH1A</i>    | TRUE | TRUE  | TRUE  |
| <i>TCTN3</i>     | TRUE | TRUE  | TRUE  |
| <i>GRAMD3</i>    | TRUE | TRUE  | TRUE  |
| <i>PCTP</i>      | TRUE | FALSE | TRUE  |
| <i>GRAMD4</i>    | TRUE | TRUE  | TRUE  |
| <i>HN1L</i>      | TRUE | TRUE  | TRUE  |
| <i>TIAM1</i>     | TRUE | FALSE | TRUE  |
| <i>ZNF749</i>    | TRUE | TRUE  | TRUE  |
| <i>DAPK3</i>     | TRUE | TRUE  | TRUE  |
| <i>RFXANK</i>    | TRUE | FALSE | FALSE |
| <i>PIM3</i>      | TRUE | FALSE | TRUE  |
| <i>FKBP3</i>     | TRUE | TRUE  | TRUE  |
| <i>SYMPK</i>     | TRUE | TRUE  | FALSE |
| <i>APOBEC3G</i>  | TRUE | TRUE  | TRUE  |
| <i>DTL</i>       | TRUE | TRUE  | TRUE  |
| <i>SPOPL</i>     | TRUE | FALSE | TRUE  |
| <i>PDRG1</i>     | TRUE | FALSE | TRUE  |
| <i>MYBBP1A</i>   | TRUE | TRUE  | TRUE  |
| <i>RCAN1</i>     | TRUE | FALSE | TRUE  |
| <i>LETM1</i>     | TRUE | FALSE | TRUE  |
| <i>BRIX1</i>     | TRUE | FALSE | TRUE  |
| <i>ICAIL</i>     | TRUE | FALSE | FALSE |

---

---

|                 |      |       |       |
|-----------------|------|-------|-------|
| <i>RBM19</i>    | TRUE | TRUE  | TRUE  |
| <i>MVD</i>      | TRUE | TRUE  | TRUE  |
| <i>GRAMD1B</i>  | TRUE | TRUE  | TRUE  |
| <i>TUBGCP3</i>  | TRUE | TRUE  | TRUE  |
| <i>TUBGCP4</i>  | TRUE | FALSE | TRUE  |
| <i>TUBGCP5</i>  | TRUE | TRUE  | TRUE  |
| <i>PSMD1</i>    | TRUE | TRUE  | TRUE  |
| <i>PSMD2</i>    | TRUE | TRUE  | FALSE |
| <i>ZNF16</i>    | TRUE | FALSE | FALSE |
| <i>MRPL21</i>   | TRUE | FALSE | TRUE  |
| <i>RABGGTB</i>  | TRUE | FALSE | TRUE  |
| <i>RABGGTA</i>  | TRUE | FALSE | FALSE |
| <i>NFE2L1</i>   | TRUE | FALSE | TRUE  |
| <i>PLBD2</i>    | TRUE | FALSE | FALSE |
| <i>YEATS2</i>   | TRUE | TRUE  | FALSE |
| <i>YIPF1</i>    | TRUE | FALSE | TRUE  |
| <i>FTSJ1</i>    | TRUE | TRUE  | TRUE  |
| <i>RAD54L2</i>  | TRUE | TRUE  | TRUE  |
| <i>MMS22L</i>   | TRUE | TRUE  | TRUE  |
| <i>IBTK</i>     | TRUE | TRUE  | TRUE  |
| <i>TMEM161A</i> | TRUE | TRUE  | FALSE |
| <i>CDT1</i>     | TRUE | FALSE | FALSE |
| <i>TNFSF8</i>   | TRUE | FALSE | TRUE  |
| <i>GMPPA</i>    | TRUE | FALSE | FALSE |
| <i>SND1</i>     | TRUE | FALSE | FALSE |
| <i>RAD50</i>    | TRUE | TRUE  | TRUE  |
| <i>USP5</i>     | TRUE | FALSE | TRUE  |
| <i>FAM86C1</i>  | TRUE | TRUE  | TRUE  |
| <i>XRCC5</i>    | TRUE | TRUE  | TRUE  |
| <i>INTS7</i>    | TRUE | TRUE  | TRUE  |
| <i>CTNNA1</i>   | TRUE | TRUE  | FALSE |
| <i>TOMM40</i>   | TRUE | FALSE | TRUE  |
| <i>CHSY1</i>    | TRUE | TRUE  | TRUE  |
| <i>FUOM</i>     | TRUE | FALSE | FALSE |
| <i>MPP6</i>     | TRUE | TRUE  | TRUE  |
| <i>PRPSAP2</i>  | TRUE | TRUE  | TRUE  |
| <i>MAN1A1</i>   | TRUE | TRUE  | TRUE  |
| <i>ATIC</i>     | TRUE | TRUE  | TRUE  |
| <i>PPRC1</i>    | TRUE | FALSE | TRUE  |
| <i>TWSG1</i>    | TRUE | FALSE | TRUE  |
| <i>CCDC137</i>  | TRUE | FALSE | TRUE  |
| <i>CCDC138</i>  | TRUE | TRUE  | TRUE  |
| <i>TIMM22</i>   | TRUE | FALSE | TRUE  |
| <i>STK39</i>    | TRUE | TRUE  | TRUE  |

---

---

|                  |       |       |       |
|------------------|-------|-------|-------|
| <i>C12orf10</i>  | TRUE  | FALSE | TRUE  |
| <i>CD2</i>       | TRUE  | FALSE | TRUE  |
| <i>DNAAF2</i>    | TRUE  | TRUE  | TRUE  |
| <i>STAT1</i>     | TRUE  | FALSE | TRUE  |
| <i>HBEGF</i>     | TRUE  | FALSE | FALSE |
| <i>POLE2</i>     | TRUE  | TRUE  | TRUE  |
| <i>LRBA</i>      | TRUE  | FALSE | TRUE  |
| <i>PLXNA1</i>    | TRUE  | FALSE | FALSE |
| <i>ASNS</i>      | TRUE  | FALSE | FALSE |
| <i>ATP5G1</i>    | TRUE  | FALSE | FALSE |
| <i>ABCC4</i>     | TRUE  | TRUE  | TRUE  |
| <i>ZNF79</i>     | TRUE  | FALSE | TRUE  |
| <i>GOLGA3</i>    | TRUE  | TRUE  | TRUE  |
| <i>UBE2L6</i>    | TRUE  | FALSE | TRUE  |
| <i>ICT1</i>      | TRUE  | TRUE  | TRUE  |
| <i>ZNF282</i>    | TRUE  | TRUE  | TRUE  |
| <i>PLAT</i>      | TRUE  | TRUE  | FALSE |
| <i>RAD23A</i>    | TRUE  | FALSE | TRUE  |
| <i>NOM1</i>      | TRUE  | FALSE | TRUE  |
| <i>IKZF4</i>     | TRUE  | FALSE | TRUE  |
| <i>IL4I1</i>     | TRUE  | TRUE  | TRUE  |
| <i>SPATS2</i>    | TRUE  | FALSE | TRUE  |
| <i>PSPH</i>      | TRUE  | FALSE | TRUE  |
| <i>WIZ</i>       | TRUE  | TRUE  | TRUE  |
| <i>TIMM21</i>    | TRUE  | FALSE | TRUE  |
| <i>UTP6</i>      | TRUE  | FALSE | TRUE  |
| <i>PRPS2</i>     | TRUE  | TRUE  | TRUE  |
| <i>TTL12</i>     | TRUE  | TRUE  | TRUE  |
| <i>LDHB</i>      | TRUE  | TRUE  | FALSE |
| <i>NOP9</i>      | FALSE | TRUE  | TRUE  |
| <i>PLRG1</i>     | FALSE | TRUE  | TRUE  |
| <i>ZC3H13</i>    | FALSE | TRUE  | TRUE  |
| <i>C14orf119</i> | FALSE | TRUE  | TRUE  |
| <i>CCDC117</i>   | FALSE | TRUE  | TRUE  |
| <i>ATP1A1</i>    | FALSE | TRUE  | TRUE  |
| <i>EIF2B5</i>    | FALSE | TRUE  | TRUE  |
| <i>MLF2</i>      | FALSE | TRUE  | TRUE  |
| <i>CLIC4</i>     | FALSE | TRUE  | TRUE  |
| <i>TMEM147</i>   | FALSE | TRUE  | FALSE |
| <i>API5</i>      | FALSE | TRUE  | TRUE  |
| <i>ZNF2</i>      | FALSE | TRUE  | FALSE |
| <i>RAC1</i>      | FALSE | TRUE  | TRUE  |
| <i>MRPS18C</i>   | FALSE | TRUE  | TRUE  |
| <i>NSUN3</i>     | FALSE | TRUE  | TRUE  |

---

---

|                     |       |      |       |
|---------------------|-------|------|-------|
| <i>TUFM</i>         | FALSE | TRUE | FALSE |
| <i>CALM2</i>        | FALSE | TRUE | TRUE  |
| <i>DNAJA2</i>       | FALSE | TRUE | TRUE  |
| <i>MRPL20</i>       | FALSE | TRUE | TRUE  |
| <i>LOC100506844</i> | FALSE | TRUE | FALSE |
| <i>SRSF1</i>        | FALSE | TRUE | FALSE |
| <i>SRSF9</i>        | FALSE | TRUE | TRUE  |
| <i>TRAPPC6B</i>     | FALSE | TRUE | TRUE  |
| <i>ZNF584</i>       | FALSE | TRUE | TRUE  |
| <i>ASUN</i>         | FALSE | TRUE | TRUE  |
| <i>MYO1B</i>        | FALSE | TRUE | TRUE  |
| <i>AKIRIN1</i>      | FALSE | TRUE | TRUE  |
| <i>TDG</i>          | FALSE | TRUE | TRUE  |
| <i>KIAA1524</i>     | FALSE | TRUE | TRUE  |
| <i>MID1IP1</i>      | FALSE | TRUE | TRUE  |
| <i>PIGF</i>         | FALSE | TRUE | TRUE  |
| <i>PIGN</i>         | FALSE | TRUE | FALSE |
| <i>PIGP</i>         | FALSE | TRUE | FALSE |
| <i>WRAP53</i>       | FALSE | TRUE | TRUE  |
| <i>PIGW</i>         | FALSE | TRUE | TRUE  |
| <i>PIGX</i>         | FALSE | TRUE | TRUE  |
| <i>EBP</i>          | FALSE | TRUE | TRUE  |
| <i>TM2D3</i>        | FALSE | TRUE | TRUE  |
| <i>NTRK2</i>        | FALSE | TRUE | TRUE  |
| <i>NKRF</i>         | FALSE | TRUE | FALSE |
| <i>TERF2</i>        | FALSE | TRUE | TRUE  |
| <i>DNAJC18</i>      | FALSE | TRUE | TRUE  |
| <i>TTC5</i>         | FALSE | TRUE | TRUE  |
| <i>TTC1</i>         | FALSE | TRUE | TRUE  |
| <i>TTC8</i>         | FALSE | TRUE | TRUE  |
| <i>TPRKB</i>        | FALSE | TRUE | TRUE  |
| <i>PRDM10</i>       | FALSE | TRUE | TRUE  |
| <i>KDM1A</i>        | FALSE | TRUE | TRUE  |
| <i>QRS1</i>         | FALSE | TRUE | TRUE  |
| <i>BTG3</i>         | FALSE | TRUE | TRUE  |
| <i>C15orf41</i>     | FALSE | TRUE | TRUE  |
| <i>FHOD1</i>        | FALSE | TRUE | TRUE  |
| <i>PSMB1</i>        | FALSE | TRUE | TRUE  |
| <i>HDHD1</i>        | FALSE | TRUE | TRUE  |
| <i>RMI1</i>         | FALSE | TRUE | TRUE  |
| <i>GNA15</i>        | FALSE | TRUE | TRUE  |
| <i>TUBE1</i>        | FALSE | TRUE | TRUE  |
| <i>SMC1A</i>        | FALSE | TRUE | TRUE  |
| <i>KRR1</i>         | FALSE | TRUE | TRUE  |

---

---

|                |       |      |       |
|----------------|-------|------|-------|
| <i>CETN3</i>   | FALSE | TRUE | TRUE  |
| <i>PHRF1</i>   | FALSE | TRUE | TRUE  |
| <i>BRF2</i>    | FALSE | TRUE | FALSE |
| <i>DNAJC3</i>  | FALSE | TRUE | TRUE  |
| <i>MAP3K4</i>  | FALSE | TRUE | TRUE  |
| <i>PET112</i>  | FALSE | TRUE | TRUE  |
| <i>RAB33A</i>  | FALSE | TRUE | TRUE  |
| <i>CMTR2</i>   | FALSE | TRUE | TRUE  |
| <i>FAM216A</i> | FALSE | TRUE | TRUE  |
| <i>SEC61G</i>  | FALSE | TRUE | TRUE  |
| <i>MTERFD1</i> | FALSE | TRUE | TRUE  |
| <i>TFG</i>     | FALSE | TRUE | TRUE  |
| <i>PPP3CB</i>  | FALSE | TRUE | TRUE  |
| <i>LRRC42</i>  | FALSE | TRUE | TRUE  |
| <i>B3GNT2</i>  | FALSE | TRUE | TRUE  |
| <i>TSFM</i>    | FALSE | TRUE | TRUE  |
| <i>GINM1</i>   | FALSE | TRUE | TRUE  |
| <i>TBCCD1</i>  | FALSE | TRUE | TRUE  |
| <i>TIAL1</i>   | FALSE | TRUE | TRUE  |
| <i>TASP1</i>   | FALSE | TRUE | FALSE |
| <i>SAP30</i>   | FALSE | TRUE | TRUE  |
| <i>CNTROB</i>  | FALSE | TRUE | FALSE |
| <i>MRPS30</i>  | FALSE | TRUE | TRUE  |
| <i>BRIP1</i>   | FALSE | TRUE | FALSE |
| <i>CARS</i>    | FALSE | TRUE | TRUE  |
| <i>ACOX1</i>   | FALSE | TRUE | TRUE  |
| <i>ITGB3BP</i> | FALSE | TRUE | TRUE  |
| <i>FLVCR2</i>  | FALSE | TRUE | TRUE  |
| <i>ATPAF1</i>  | FALSE | TRUE | TRUE  |
| <i>TMEM102</i> | FALSE | TRUE | TRUE  |
| <i>GHITM</i>   | FALSE | TRUE | TRUE  |
| <i>TIMM8B</i>  | FALSE | TRUE | TRUE  |
| <i>HLTF</i>    | FALSE | TRUE | TRUE  |
| <i>GPALPP1</i> | FALSE | TRUE | TRUE  |
| <i>VPS41</i>   | FALSE | TRUE | FALSE |
| <i>EPB41L2</i> | FALSE | TRUE | FALSE |
| <i>VPS4A</i>   | FALSE | TRUE | TRUE  |
| <i>DCAF13</i>  | FALSE | TRUE | TRUE  |
| <i>DCAF12</i>  | FALSE | TRUE | TRUE  |
| <i>PALB2</i>   | FALSE | TRUE | TRUE  |
| <i>KLF16</i>   | FALSE | TRUE | TRUE  |
| <i>GBE1</i>    | FALSE | TRUE | FALSE |
| <i>COQ7</i>    | FALSE | TRUE | TRUE  |
| <i>PPT1</i>    | FALSE | TRUE | FALSE |

---

---

|                  |       |      |       |
|------------------|-------|------|-------|
| <i>H2AFZ</i>     | FALSE | TRUE | TRUE  |
| <i>RNF6</i>      | FALSE | TRUE | TRUE  |
| <i>ADRBK2</i>    | FALSE | TRUE | TRUE  |
| <i>HARS</i>      | FALSE | TRUE | TRUE  |
| <i>FAM118B</i>   | FALSE | TRUE | TRUE  |
| <i>XPNPEP3</i>   | FALSE | TRUE | TRUE  |
| <i>WBSCR22</i>   | FALSE | TRUE | FALSE |
| <i>ICOS</i>      | FALSE | TRUE | TRUE  |
| <i>SNRPC</i>     | FALSE | TRUE | TRUE  |
| <i>CSNK1A1P1</i> | FALSE | TRUE | TRUE  |
| <i>ZDHHC12</i>   | FALSE | TRUE | TRUE  |
| <i>GPATCH1</i>   | FALSE | TRUE | TRUE  |
| <i>UBE2D2</i>    | FALSE | TRUE | TRUE  |
| <i>FAM104B</i>   | FALSE | TRUE | TRUE  |
| <i>CCDC51</i>    | FALSE | TRUE | TRUE  |
| <i>PAXIP1</i>    | FALSE | TRUE | TRUE  |
| <i>NUFIP1</i>    | FALSE | TRUE | TRUE  |
| <i>SLC35B2</i>   | FALSE | TRUE | TRUE  |
| <i>FICD</i>      | FALSE | TRUE | TRUE  |
| <i>LONRF1</i>    | FALSE | TRUE | TRUE  |
| <i>WDR3</i>      | FALSE | TRUE | TRUE  |
| <i>VPS25</i>     | FALSE | TRUE | TRUE  |
| <i>FAM60A</i>    | FALSE | TRUE | TRUE  |
| <i>CBWD2</i>     | FALSE | TRUE | TRUE  |
| <i>CBWD1</i>     | FALSE | TRUE | TRUE  |
| <i>MRPL40</i>    | FALSE | TRUE | TRUE  |
| <i>MRPL44</i>    | FALSE | TRUE | TRUE  |
| <i>TRIP6</i>     | FALSE | TRUE | TRUE  |
| <i>MRPL49</i>    | FALSE | TRUE | TRUE  |
| <i>MRPL48</i>    | FALSE | TRUE | TRUE  |
| <i>RUVBL1</i>    | FALSE | TRUE | TRUE  |
| <i>ZZZ3</i>      | FALSE | TRUE | TRUE  |
| <i>PHEX</i>      | FALSE | TRUE | TRUE  |
| <i>TBP</i>       | FALSE | TRUE | TRUE  |
| <i>ADSS</i>      | FALSE | TRUE | TRUE  |
| <i>TIMMDC1</i>   | FALSE | TRUE | TRUE  |
| <i>NUDT15</i>    | FALSE | TRUE | TRUE  |
| <i>RSRC1</i>     | FALSE | TRUE | TRUE  |
| <i>RTCB</i>      | FALSE | TRUE | TRUE  |
| <i>RTCA</i>      | FALSE | TRUE | TRUE  |
| <i>GTF3C3</i>    | FALSE | TRUE | TRUE  |
| <i>BRCA1</i>     | FALSE | TRUE | TRUE  |
| <i>BRCA2</i>     | FALSE | TRUE | TRUE  |
| <i>DDI2</i>      | FALSE | TRUE | TRUE  |

---

---

|                 |       |      |       |
|-----------------|-------|------|-------|
| <i>PITPNA</i>   | FALSE | TRUE | TRUE  |
| <i>CAAP1</i>    | FALSE | TRUE | TRUE  |
| <i>MRPS23</i>   | FALSE | TRUE | FALSE |
| <i>PPP2R5E</i>  | FALSE | TRUE | TRUE  |
| <i>JMJD4</i>    | FALSE | TRUE | TRUE  |
| <i>GAS8</i>     | FALSE | TRUE | TRUE  |
| <i>GOT1</i>     | FALSE | TRUE | TRUE  |
| <i>HIBCH</i>    | FALSE | TRUE | FALSE |
| <i>THUMPD3</i>  | FALSE | TRUE | TRUE  |
| <i>MLLT4</i>    | FALSE | TRUE | TRUE  |
| <i>COPG1</i>    | FALSE | TRUE | TRUE  |
| <i>ZNHIT6</i>   | FALSE | TRUE | TRUE  |
| <i>LYRM2</i>    | FALSE | TRUE | FALSE |
| <i>LYRM7</i>    | FALSE | TRUE | TRUE  |
| <i>NFS1</i>     | FALSE | TRUE | TRUE  |
| <i>MANEA</i>    | FALSE | TRUE | TRUE  |
| <i>C1orf131</i> | FALSE | TRUE | TRUE  |
| <i>EIF1B</i>    | FALSE | TRUE | TRUE  |
| <i>NRD1</i>     | FALSE | TRUE | FALSE |
| <i>MPZL3</i>    | FALSE | TRUE | TRUE  |
| <i>DDOST</i>    | FALSE | TRUE | FALSE |
| <i>PUSL1</i>    | FALSE | TRUE | TRUE  |
| <i>PTPRE</i>    | FALSE | TRUE | TRUE  |
| <i>PTPRK</i>    | FALSE | TRUE | FALSE |
| <i>N6AMT1</i>   | FALSE | TRUE | TRUE  |
| <i>HMGN5</i>    | FALSE | TRUE | FALSE |
| <i>EFTUD1</i>   | FALSE | TRUE | TRUE  |
| <i>ERLIN2</i>   | FALSE | TRUE | TRUE  |
| <i>SPDL1</i>    | FALSE | TRUE | TRUE  |
| <i>SPG20</i>    | FALSE | TRUE | TRUE  |
| <i>WDR35</i>    | FALSE | TRUE | TRUE  |
| <i>FAM206A</i>  | FALSE | TRUE | TRUE  |
| <i>TM9SF1</i>   | FALSE | TRUE | TRUE  |
| <i>HENMT1</i>   | FALSE | TRUE | TRUE  |
| <i>MEPCE</i>    | FALSE | TRUE | TRUE  |
| <i>CPSF6</i>    | FALSE | TRUE | TRUE  |
| <i>CPSF2</i>    | FALSE | TRUE | TRUE  |
| <i>ACAA2</i>    | FALSE | TRUE | TRUE  |
| <i>SIPA1L2</i>  | FALSE | TRUE | TRUE  |
| <i>SLC35F5</i>  | FALSE | TRUE | TRUE  |
| <i>TRMT112</i>  | FALSE | TRUE | FALSE |
| <i>SLC25A14</i> | FALSE | TRUE | TRUE  |
| <i>SLC25A11</i> | FALSE | TRUE | TRUE  |
| <i>ALG2</i>     | FALSE | TRUE | TRUE  |

---

---

|                 |       |      |       |
|-----------------|-------|------|-------|
| <i>ALG5</i>     | FALSE | TRUE | TRUE  |
| <i>SMARCE1</i>  | FALSE | TRUE | TRUE  |
| <i>RNGTT</i>    | FALSE | TRUE | TRUE  |
| <i>SHPK</i>     | FALSE | TRUE | TRUE  |
| <i>SNHG12</i>   | FALSE | TRUE | FALSE |
| <i>GIN1</i>     | FALSE | TRUE | TRUE  |
| <i>ZGRF1</i>    | FALSE | TRUE | FALSE |
| <i>NOTCH1</i>   | FALSE | TRUE | TRUE  |
| <i>KPNA6</i>    | FALSE | TRUE | TRUE  |
| <i>SLC25A19</i> | FALSE | TRUE | TRUE  |
| <i>C6orf211</i> | FALSE | TRUE | TRUE  |
| <i>CD68</i>     | FALSE | TRUE | FALSE |
| <i>MAD2L1BP</i> | FALSE | TRUE | FALSE |
| <i>NGDN</i>     | FALSE | TRUE | TRUE  |
| <i>IREB2</i>    | FALSE | TRUE | TRUE  |
| <i>C15orf39</i> | FALSE | TRUE | TRUE  |
| <i>SLC25A30</i> | FALSE | TRUE | TRUE  |
| <i>TUBA1B</i>   | FALSE | TRUE | TRUE  |
| <i>DBF4</i>     | FALSE | TRUE | TRUE  |
| <i>TAF2</i>     | FALSE | TRUE | TRUE  |
| <i>TSPAN31</i>  | FALSE | TRUE | TRUE  |
| <i>AGPS</i>     | FALSE | TRUE | TRUE  |
| <i>LRRCC1</i>   | FALSE | TRUE | TRUE  |
| <i>PDCD2</i>    | FALSE | TRUE | TRUE  |
| <i>HDLBP</i>    | FALSE | TRUE | TRUE  |
| <i>SREBF2</i>   | FALSE | TRUE | TRUE  |
| <i>RAB39B</i>   | FALSE | TRUE | TRUE  |
| <i>TATDN3</i>   | FALSE | TRUE | TRUE  |
| <i>GLE1</i>     | FALSE | TRUE | TRUE  |
| <i>MTA2</i>     | FALSE | TRUE | TRUE  |
| <i>BBS5</i>     | FALSE | TRUE | TRUE  |
| <i>C2orf44</i>  | FALSE | TRUE | TRUE  |
| <i>C2orf42</i>  | FALSE | TRUE | TRUE  |
| <i>ZSWIM1</i>   | FALSE | TRUE | TRUE  |
| <i>PIK3C3</i>   | FALSE | TRUE | TRUE  |
| <i>EDC3</i>     | FALSE | TRUE | TRUE  |
| <i>GMDS</i>     | FALSE | TRUE | FALSE |
| <i>MPV17</i>    | FALSE | TRUE | FALSE |
| <i>PSMD13</i>   | FALSE | TRUE | TRUE  |
| <i>ETNK1</i>    | FALSE | TRUE | TRUE  |
| <i>EIF4E2</i>   | FALSE | TRUE | TRUE  |
| <i>CALU</i>     | FALSE | TRUE | TRUE  |
| <i>WDR70</i>    | FALSE | TRUE | FALSE |
| <i>WDR75</i>    | FALSE | TRUE | TRUE  |

---



---

|                 |       |      |       |
|-----------------|-------|------|-------|
| <i>PPP2R3C</i>  | FALSE | TRUE | TRUE  |
| <i>ZFP64</i>    | FALSE | TRUE | TRUE  |
| <i>ARL14EP</i>  | FALSE | TRUE | TRUE  |
| <i>KIF15</i>    | FALSE | TRUE | FALSE |
| <i>PAK1</i>     | FALSE | TRUE | TRUE  |
| <i>NSDHL</i>    | FALSE | TRUE | TRUE  |
| <i>TRAF3IP1</i> | FALSE | TRUE | TRUE  |
| <i>CEP78</i>    | FALSE | TRUE | TRUE  |
| <i>TMEM216</i>  | FALSE | TRUE | TRUE  |
| <i>COX10</i>    | FALSE | TRUE | TRUE  |
| <i>ILKAP</i>    | FALSE | TRUE | TRUE  |
| <i>COX15</i>    | FALSE | TRUE | TRUE  |
| <i>RAB19</i>    | FALSE | TRUE | TRUE  |
| <i>BET1</i>     | FALSE | TRUE | TRUE  |
| <i>NFYB</i>     | FALSE | TRUE | TRUE  |
| <i>RABL3</i>    | FALSE | TRUE | TRUE  |
| <i>CCT6A</i>    | FALSE | TRUE | TRUE  |
| <i>PAF1</i>     | FALSE | TRUE | TRUE  |
| <i>TANK</i>     | FALSE | TRUE | TRUE  |
| <i>TM2D2</i>    | FALSE | TRUE | TRUE  |
| <i>CUL1</i>     | FALSE | TRUE | TRUE  |
| <i>TRIM28</i>   | FALSE | TRUE | TRUE  |
| <i>CREB3</i>    | FALSE | TRUE | TRUE  |
| <i>DYNC2LI1</i> | FALSE | TRUE | FALSE |
| <i>NKAP</i>     | FALSE | TRUE | TRUE  |
| <i>ICOSLG</i>   | FALSE | TRUE | TRUE  |
| <i>CEP128</i>   | FALSE | TRUE | FALSE |
| <i>MRPL2</i>    | FALSE | TRUE | TRUE  |
| <i>ZNF614</i>   | FALSE | TRUE | TRUE  |
| <i>ZNF616</i>   | FALSE | TRUE | TRUE  |
| <i>BAG2</i>     | FALSE | TRUE | TRUE  |
| <i>PDHA1</i>    | FALSE | TRUE | TRUE  |
| <i>COL4A3BP</i> | FALSE | TRUE | TRUE  |
| <i>RDH11</i>    | FALSE | TRUE | TRUE  |
| <i>NAB2</i>     | FALSE | TRUE | TRUE  |
| <i>MRPS9</i>    | FALSE | TRUE | TRUE  |
| <i>FAM200A</i>  | FALSE | TRUE | TRUE  |
| <i>POLR2E</i>   | FALSE | TRUE | FALSE |
| <i>POLR2G</i>   | FALSE | TRUE | TRUE  |
| <i>GTF3A</i>    | FALSE | TRUE | FALSE |
| <i>ASCC1</i>    | FALSE | TRUE | TRUE  |
| <i>MAPK14</i>   | FALSE | TRUE | TRUE  |
| <i>FZD6</i>     | FALSE | TRUE | TRUE  |
| <i>HUS1</i>     | FALSE | TRUE | TRUE  |

---

---

|                 |       |      |       |
|-----------------|-------|------|-------|
| <i>USO1</i>     | FALSE | TRUE | TRUE  |
| <i>ITFG1</i>    | FALSE | TRUE | FALSE |
| <i>C14orf80</i> | FALSE | TRUE | TRUE  |
| <i>GTF2H3</i>   | FALSE | TRUE | TRUE  |
| <i>TVP23B</i>   | FALSE | TRUE | TRUE  |
| <i>ATF5</i>     | FALSE | TRUE | TRUE  |
| <i>ATF4</i>     | FALSE | TRUE | FALSE |
| <i>ATF1</i>     | FALSE | TRUE | TRUE  |
| <i>ABHD10</i>   | FALSE | TRUE | TRUE  |
| <i>SUMO2</i>    | FALSE | TRUE | FALSE |
| <i>BLOC1S6</i>  | FALSE | TRUE | TRUE  |
| <i>PPP2R4</i>   | FALSE | TRUE | TRUE  |
| <i>SLC38A9</i>  | FALSE | TRUE | TRUE  |
| <i>STK3</i>     | FALSE | TRUE | TRUE  |
| <i>UBE4B</i>    | FALSE | TRUE | TRUE  |
| <i>SNRNP27</i>  | FALSE | TRUE | TRUE  |
| <i>SENP5</i>    | FALSE | TRUE | TRUE  |
| <i>SENP1</i>    | FALSE | TRUE | TRUE  |
| <i>ING2</i>     | FALSE | TRUE | FALSE |
| <i>ZNF823</i>   | FALSE | TRUE | FALSE |
| <i>ECHDC1</i>   | FALSE | TRUE | TRUE  |
| <i>ANKRD37</i>  | FALSE | TRUE | TRUE  |
| <i>ANKRD32</i>  | FALSE | TRUE | TRUE  |
| <i>GLS</i>      | FALSE | TRUE | TRUE  |
| <i>LAPTM4B</i>  | FALSE | TRUE | TRUE  |
| <i>RIF1</i>     | FALSE | TRUE | TRUE  |
| <i>STARD3NL</i> | FALSE | TRUE | TRUE  |
| <i>SMARCA1</i>  | FALSE | TRUE | TRUE  |
| <i>ENDOD1</i>   | FALSE | TRUE | TRUE  |
| <i>IPMK</i>     | FALSE | TRUE | TRUE  |
| <i>UBLCP1</i>   | FALSE | TRUE | TRUE  |
| <i>CD2BP2</i>   | FALSE | TRUE | TRUE  |
| <i>TULP3</i>    | FALSE | TRUE | TRUE  |
| <i>FARP2</i>    | FALSE | TRUE | TRUE  |
| <i>C9orf41</i>  | FALSE | TRUE | TRUE  |
| <i>FANCM</i>    | FALSE | TRUE | TRUE  |
| <i>CDK2</i>     | FALSE | TRUE | TRUE  |
| <i>CDK4</i>     | FALSE | TRUE | TRUE  |
| <i>CDK5</i>     | FALSE | TRUE | FALSE |
| <i>CDK7</i>     | FALSE | TRUE | TRUE  |
| <i>FAM188A</i>  | FALSE | TRUE | TRUE  |
| <i>HSPD1</i>    | FALSE | TRUE | TRUE  |
| <i>SEC11C</i>   | FALSE | TRUE | FALSE |
| <i>MUL1</i>     | FALSE | TRUE | TRUE  |

---

---

|                    |       |      |       |
|--------------------|-------|------|-------|
| <i>PPIL1</i>       | FALSE | TRUE | TRUE  |
| <i>PPP1R7</i>      | FALSE | TRUE | TRUE  |
| <i>EMD</i>         | FALSE | TRUE | FALSE |
| <i>SGOL2</i>       | FALSE | TRUE | TRUE  |
| <i>PHF23</i>       | FALSE | TRUE | TRUE  |
| <i>UBE2M</i>       | FALSE | TRUE | TRUE  |
| <i>FAM162A</i>     | FALSE | TRUE | TRUE  |
| <i>UBE2B</i>       | FALSE | TRUE | TRUE  |
| <i>UBE2Z</i>       | FALSE | TRUE | TRUE  |
| <i>UBE2W</i>       | FALSE | TRUE | TRUE  |
| <i>MORF4L2</i>     | FALSE | TRUE | TRUE  |
| <i>RABEPK</i>      | FALSE | TRUE | TRUE  |
| <i>UFMI</i>        | FALSE | TRUE | TRUE  |
| <i>TXNL4B</i>      | FALSE | TRUE | TRUE  |
| <i>PDCD7</i>       | FALSE | TRUE | TRUE  |
| <i>TMEM33</i>      | FALSE | TRUE | TRUE  |
| <i>MEAI</i>        | FALSE | TRUE | FALSE |
| <i>GSTCD</i>       | FALSE | TRUE | TRUE  |
| <i>PARG</i>        | FALSE | TRUE | TRUE  |
| <i>PI4K2B</i>      | FALSE | TRUE | TRUE  |
| <i>PI4K2A</i>      | FALSE | TRUE | TRUE  |
| <i>NHLRC2</i>      | FALSE | TRUE | TRUE  |
| <i>CXorf56</i>     | FALSE | TRUE | TRUE  |
| <i>OTUD6B</i>      | FALSE | TRUE | TRUE  |
| <i>DDX1</i>        | FALSE | TRUE | TRUE  |
| <i>NUP205</i>      | FALSE | TRUE | TRUE  |
| <i>CYB5D1</i>      | FALSE | TRUE | TRUE  |
| <i>KIAA0100</i>    | FALSE | TRUE | FALSE |
| <i>HAUS8</i>       | FALSE | TRUE | FALSE |
| <i>HAUS6</i>       | FALSE | TRUE | TRUE  |
| <i>HAUS1</i>       | FALSE | TRUE | TRUE  |
| <i>UBXN8</i>       | FALSE | TRUE | TRUE  |
| <i>TNFAIP8</i>     | FALSE | TRUE | TRUE  |
| <i>NIFK</i>        | FALSE | TRUE | TRUE  |
| <i>NXT2</i>        | FALSE | TRUE | TRUE  |
| <i>SSBP1</i>       | FALSE | TRUE | TRUE  |
| <i>BCL10</i>       | FALSE | TRUE | TRUE  |
| <i>TYW1</i>        | FALSE | TRUE | TRUE  |
| <i>RNASEH1-AS1</i> | FALSE | TRUE | TRUE  |
| <i>RHBDD1</i>      | FALSE | TRUE | TRUE  |
| <i>ZNF770</i>      | FALSE | TRUE | TRUE  |
| <i>ZNF511</i>      | FALSE | TRUE | TRUE  |
| <i>SLC39A9</i>     | FALSE | TRUE | TRUE  |
| <i>SLC39A6</i>     | FALSE | TRUE | TRUE  |

---

---

|                  |       |      |       |
|------------------|-------|------|-------|
| <i>SMG8</i>      | FALSE | TRUE | TRUE  |
| <i>SCAF4</i>     | FALSE | TRUE | TRUE  |
| <i>NAA30</i>     | FALSE | TRUE | TRUE  |
| <i>RBM7</i>      | FALSE | TRUE | TRUE  |
| <i>COA6</i>      | FALSE | TRUE | TRUE  |
| <i>COA1</i>      | FALSE | TRUE | TRUE  |
| <i>COA3</i>      | FALSE | TRUE | TRUE  |
| <i>ARMCX3</i>    | FALSE | TRUE | TRUE  |
| <i>RBMX</i>      | FALSE | TRUE | TRUE  |
| <i>FUT8</i>      | FALSE | TRUE | FALSE |
| <i>R3HCC1L</i>   | FALSE | TRUE | TRUE  |
| <i>RPL23AP7</i>  | FALSE | TRUE | TRUE  |
| <i>PAFAH1B2</i>  | FALSE | TRUE | TRUE  |
| <i>MT1E</i>      | FALSE | TRUE | TRUE  |
| <i>TIFA</i>      | FALSE | TRUE | FALSE |
| <i>BBS12</i>     | FALSE | TRUE | TRUE  |
| <i>PROSC</i>     | FALSE | TRUE | TRUE  |
| <i>TCERG1</i>    | FALSE | TRUE | TRUE  |
| <i>CNBP</i>      | FALSE | TRUE | TRUE  |
| <i>INTS12</i>    | FALSE | TRUE | TRUE  |
| <i>CSPP1</i>     | FALSE | TRUE | TRUE  |
| <i>OSGEPL1</i>   | FALSE | TRUE | TRUE  |
| <i>YWHAH</i>     | FALSE | TRUE | TRUE  |
| <i>YWHAG</i>     | FALSE | TRUE | TRUE  |
| <i>YWHAE</i>     | FALSE | TRUE | TRUE  |
| <i>SSNA1</i>     | FALSE | TRUE | FALSE |
| <i>CKAP5</i>     | FALSE | TRUE | TRUE  |
| <i>TRAPPC2L</i>  | FALSE | TRUE | TRUE  |
| <i>TNIP3</i>     | FALSE | TRUE | TRUE  |
| <i>ZAK</i>       | FALSE | TRUE | TRUE  |
| <i>UHRF1BP1</i>  | FALSE | TRUE | TRUE  |
| <i>AAR2</i>      | FALSE | TRUE | TRUE  |
| <i>LIG3</i>      | FALSE | TRUE | TRUE  |
| <i>DBR1</i>      | FALSE | TRUE | TRUE  |
| <i>PRRT3</i>     | FALSE | TRUE | TRUE  |
| <i>FAH</i>       | FALSE | TRUE | TRUE  |
| <i>LLPH</i>      | FALSE | TRUE | TRUE  |
| <i>HNRNPA2B1</i> | FALSE | TRUE | FALSE |
| <i>LZIC</i>      | FALSE | TRUE | TRUE  |
| <i>COG7</i>      | FALSE | TRUE | TRUE  |
| <i>COG6</i>      | FALSE | TRUE | TRUE  |
| <i>COG5</i>      | FALSE | TRUE | TRUE  |
| <i>C12orf49</i>  | FALSE | TRUE | TRUE  |
| <i>SCOC</i>      | FALSE | TRUE | TRUE  |

---

---

|                  |       |      |       |
|------------------|-------|------|-------|
| <i>POC5</i>      | FALSE | TRUE | TRUE  |
| <i>KBTBD8</i>    | FALSE | TRUE | TRUE  |
| <i>RBM23</i>     | FALSE | TRUE | TRUE  |
| <i>MNAT1</i>     | FALSE | TRUE | TRUE  |
| <i>ARHGAP11B</i> | FALSE | TRUE | TRUE  |
| <i>DESI2</i>     | FALSE | TRUE | TRUE  |
| <i>TSR1</i>      | FALSE | TRUE | TRUE  |
| <i>TSR3</i>      | FALSE | TRUE | TRUE  |
| <i>TSR2</i>      | FALSE | TRUE | TRUE  |
| <i>DAZAP1</i>    | FALSE | TRUE | FALSE |
| <i>AHCYL1</i>    | FALSE | TRUE | TRUE  |
| <i>AP4S1</i>     | FALSE | TRUE | TRUE  |
| <i>MFAP1</i>     | FALSE | TRUE | TRUE  |
| <i>C19orf55</i>  | FALSE | TRUE | TRUE  |
| <i>LACTB</i>     | FALSE | TRUE | TRUE  |
| <i>TNFSF11</i>   | FALSE | TRUE | TRUE  |
| <i>GEMIN6</i>    | FALSE | TRUE | TRUE  |
| <i>GEMIN5</i>    | FALSE | TRUE | FALSE |
| <i>CCT8</i>      | FALSE | TRUE | TRUE  |
| <i>CCT7</i>      | FALSE | TRUE | TRUE  |
| <i>TIMM10</i>    | FALSE | TRUE | TRUE  |
| <i>FBR3</i>      | FALSE | TRUE | TRUE  |
| <i>IFT74</i>     | FALSE | TRUE | TRUE  |
| <i>ZC3H8</i>     | FALSE | TRUE | TRUE  |
| <i>LRR1</i>      | FALSE | TRUE | TRUE  |
| <i>GFM1</i>      | FALSE | TRUE | TRUE  |
| <i>DCTN5</i>     | FALSE | TRUE | TRUE  |
| <i>FAM96B</i>    | FALSE | TRUE | TRUE  |
| <i>RNF25</i>     | FALSE | TRUE | TRUE  |
| <i>UBE2V2</i>    | FALSE | TRUE | TRUE  |
| <i>IGSF3</i>     | FALSE | TRUE | TRUE  |
| <i>NHS</i>       | FALSE | TRUE | TRUE  |
| <i>CNOT3</i>     | FALSE | TRUE | TRUE  |
| <i>CNOT7</i>     | FALSE | TRUE | TRUE  |
| <i>CNOT6</i>     | FALSE | TRUE | TRUE  |
| <i>YARS2</i>     | FALSE | TRUE | TRUE  |
| <i>SLC12A2</i>   | FALSE | TRUE | TRUE  |
| <i>IMP4</i>      | FALSE | TRUE | TRUE  |
| <i>TESK1</i>     | FALSE | TRUE | TRUE  |
| <i>OSBP</i>      | FALSE | TRUE | TRUE  |
| <i>SNX4</i>      | FALSE | TRUE | TRUE  |
| <i>CCDC125</i>   | FALSE | TRUE | TRUE  |
| <i>CEP170</i>    | FALSE | TRUE | TRUE  |
| <i>AH11</i>      | FALSE | TRUE | TRUE  |

---

---

|                 |       |      |       |
|-----------------|-------|------|-------|
| <i>FANCD2</i>   | FALSE | TRUE | TRUE  |
| <i>RRP8</i>     | FALSE | TRUE | TRUE  |
| <i>HNRNPL</i>   | FALSE | TRUE | FALSE |
| <i>ATP6V0B</i>  | FALSE | TRUE | TRUE  |
| <i>SMEK2</i>    | FALSE | TRUE | TRUE  |
| <i>RCE1</i>     | FALSE | TRUE | TRUE  |
| <i>NEU3</i>     | FALSE | TRUE | TRUE  |
| <i>UQCR10</i>   | FALSE | TRUE | TRUE  |
| <i>RPRD1B</i>   | FALSE | TRUE | TRUE  |
| <i>MED17</i>    | FALSE | TRUE | TRUE  |
| <i>MED18</i>    | FALSE | TRUE | FALSE |
| <i>TOPBP1</i>   | FALSE | TRUE | TRUE  |
| <i>PMAIP1</i>   | FALSE | TRUE | TRUE  |
| <i>SLC30A6</i>  | FALSE | TRUE | TRUE  |
| <i>SLC30A1</i>  | FALSE | TRUE | TRUE  |
| <i>SNRNP200</i> | FALSE | TRUE | FALSE |
| <i>NARS2</i>    | FALSE | TRUE | FALSE |
| <i>NUPL1</i>    | FALSE | TRUE | TRUE  |
| <i>NUPL2</i>    | FALSE | TRUE | TRUE  |
| <i>NCAPG</i>    | FALSE | TRUE | TRUE  |
| <i>EIF5A</i>    | FALSE | TRUE | TRUE  |
| <i>OXCT1</i>    | FALSE | TRUE | TRUE  |
| <i>APTX</i>     | FALSE | TRUE | TRUE  |
| <i>CD83</i>     | FALSE | TRUE | TRUE  |
| <i>HK1</i>      | FALSE | TRUE | TRUE  |
| <i>PIK3R4</i>   | FALSE | TRUE | TRUE  |
| <i>HIATL1</i>   | FALSE | TRUE | TRUE  |
| <i>CHRNA5</i>   | FALSE | TRUE | TRUE  |
| <i>ID2</i>      | FALSE | TRUE | TRUE  |
| <i>FOPNL</i>    | FALSE | TRUE | TRUE  |
| <i>SEC31A</i>   | FALSE | TRUE | TRUE  |
| <i>PEF1</i>     | FALSE | TRUE | TRUE  |
| <i>ACTL6A</i>   | FALSE | TRUE | TRUE  |
| <i>ORC5</i>     | FALSE | TRUE | TRUE  |
| <i>RCC2</i>     | FALSE | TRUE | TRUE  |
| <i>NCBP2</i>    | FALSE | TRUE | TRUE  |
| <i>CBLB</i>     | FALSE | TRUE | FALSE |
| <i>ZNF41</i>    | FALSE | TRUE | TRUE  |
| <i>TRAPPC4</i>  | FALSE | TRUE | TRUE  |
| <i>PSMG3</i>    | FALSE | TRUE | TRUE  |
| <i>PPID</i>     | FALSE | TRUE | TRUE  |
| <i>FKTN</i>     | FALSE | TRUE | FALSE |
| <i>ZSWIM3</i>   | FALSE | TRUE | FALSE |
| <i>NOL8</i>     | FALSE | TRUE | TRUE  |

---

---

|                |       |      |       |
|----------------|-------|------|-------|
| <i>SARIA</i>   | FALSE | TRUE | TRUE  |
| <i>CLPTM1</i>  | FALSE | TRUE | TRUE  |
| <i>CYB5B</i>   | FALSE | TRUE | TRUE  |
| <i>SYTL3</i>   | FALSE | TRUE | TRUE  |
| <i>VIMP</i>    | FALSE | TRUE | TRUE  |
| <i>MRPL36</i>  | FALSE | TRUE | TRUE  |
| <i>MRPL32</i>  | FALSE | TRUE | TRUE  |
| <i>MRPL33</i>  | FALSE | TRUE | FALSE |
| <i>THOC1</i>   | FALSE | TRUE | TRUE  |
| <i>NUP85</i>   | FALSE | TRUE | TRUE  |
| <i>PARPBP</i>  | FALSE | TRUE | TRUE  |
| <i>FDFT1</i>   | FALSE | TRUE | TRUE  |
| <i>NUDT9</i>   | FALSE | TRUE | TRUE  |
| <i>NUDT5</i>   | FALSE | TRUE | TRUE  |
| <i>LARS</i>    | FALSE | TRUE | FALSE |
| <i>FAM168B</i> | FALSE | TRUE | TRUE  |
| <i>IPPK</i>    | FALSE | TRUE | TRUE  |
| <i>NDFIP1</i>  | FALSE | TRUE | TRUE  |
| <i>KIF11</i>   | FALSE | TRUE | TRUE  |
| <i>GTF3C2</i>  | FALSE | TRUE | TRUE  |
| <i>TCP1</i>    | FALSE | TRUE | TRUE  |
| <i>MAD2L1</i>  | FALSE | TRUE | TRUE  |
| <i>SLC16A3</i> | FALSE | TRUE | TRUE  |
| <i>DYNLL1</i>  | FALSE | TRUE | TRUE  |
| <i>RBM4B</i>   | FALSE | TRUE | TRUE  |
| <i>RBM45</i>   | FALSE | TRUE | TRUE  |
| <i>ABCF3</i>   | FALSE | TRUE | TRUE  |
| <i>LRCH3</i>   | FALSE | TRUE | TRUE  |
| <i>PSMA7</i>   | FALSE | TRUE | TRUE  |
| <i>FBXO45</i>  | FALSE | TRUE | TRUE  |
| <i>JAGN1</i>   | FALSE | TRUE | TRUE  |
| <i>NIP7</i>    | FALSE | TRUE | TRUE  |
| <i>PEX12</i>   | FALSE | TRUE | TRUE  |
| <i>UBR1</i>    | FALSE | TRUE | TRUE  |
| <i>UBR5</i>    | FALSE | TRUE | TRUE  |
| <i>SRPR</i>    | FALSE | TRUE | TRUE  |
| <i>PPP2CB</i>  | FALSE | TRUE | TRUE  |
| <i>CCNC</i>    | FALSE | TRUE | TRUE  |
| <i>TBRG4</i>   | FALSE | TRUE | TRUE  |
| <i>MRPL16</i>  | FALSE | TRUE | TRUE  |
| <i>AIFM1</i>   | FALSE | TRUE | TRUE  |
| <i>FAM217B</i> | FALSE | TRUE | TRUE  |
| <i>GPN3</i>    | FALSE | TRUE | TRUE  |
| <i>NFKB2</i>   | FALSE | TRUE | TRUE  |

---

---

|                 |       |      |       |
|-----------------|-------|------|-------|
| <i>EMILIN2</i>  | FALSE | TRUE | TRUE  |
| <i>PIAS2</i>    | FALSE | TRUE | TRUE  |
| <i>PIAS4</i>    | FALSE | TRUE | TRUE  |
| <i>PHF6</i>     | FALSE | TRUE | TRUE  |
| <i>ALS2</i>     | FALSE | TRUE | TRUE  |
| <i>SDHD</i>     | FALSE | TRUE | TRUE  |
| <i>ZCCHC10</i>  | FALSE | TRUE | TRUE  |
| <i>CCDC142</i>  | FALSE | TRUE | TRUE  |
| <i>FAM114A2</i> | FALSE | TRUE | TRUE  |
| <i>PTGR2</i>    | FALSE | TRUE | TRUE  |
| <i>TUBB4B</i>   | FALSE | TRUE | TRUE  |
| <i>BMS1</i>     | FALSE | TRUE | TRUE  |
| <i>AHSA1</i>    | FALSE | TRUE | TRUE  |
| <i>OCIAD1</i>   | FALSE | TRUE | FALSE |
| <i>GLMN</i>     | FALSE | TRUE | FALSE |
| <i>TTC33</i>    | FALSE | TRUE | TRUE  |
| <i>GEMIN2</i>   | FALSE | TRUE | TRUE  |
| <i>C4orf46</i>  | FALSE | TRUE | TRUE  |
| <i>ERAL1</i>    | FALSE | TRUE | TRUE  |
| <i>DDX18</i>    | FALSE | TRUE | TRUE  |
| <i>TRIP12</i>   | FALSE | TRUE | TRUE  |
| <i>NCLN</i>     | FALSE | TRUE | FALSE |
| <i>EIF3I</i>    | FALSE | TRUE | FALSE |
| <i>EIF3D</i>    | FALSE | TRUE | TRUE  |
| <i>HSBP1</i>    | FALSE | TRUE | TRUE  |
| <i>SRRD</i>     | FALSE | TRUE | TRUE  |
| <i>KDM6B</i>    | FALSE | TRUE | FALSE |
| <i>RNF145</i>   | FALSE | TRUE | TRUE  |
| <i>ITPR1</i>    | FALSE | TRUE | FALSE |
| <i>MSANTD4</i>  | FALSE | TRUE | TRUE  |
| <i>VPS37C</i>   | FALSE | TRUE | TRUE  |
| <i>SFPQ</i>     | FALSE | TRUE | TRUE  |
| <i>KIAA0753</i> | FALSE | TRUE | TRUE  |
| <i>PALLD</i>    | FALSE | TRUE | TRUE  |
| <i>MCM7</i>     | FALSE | TRUE | TRUE  |
| <i>MRGBP</i>    | FALSE | TRUE | TRUE  |
| <i>ZNF146</i>   | FALSE | TRUE | TRUE  |
| <i>CPT2</i>     | FALSE | TRUE | TRUE  |
| <i>SLC35A4</i>  | FALSE | TRUE | TRUE  |
| <i>SLC35A5</i>  | FALSE | TRUE | TRUE  |
| <i>SLC35A2</i>  | FALSE | TRUE | TRUE  |
| <i>FAF2</i>     | FALSE | TRUE | TRUE  |
| <i>PGMI</i>     | FALSE | TRUE | TRUE  |
| <i>SLC25A46</i> | FALSE | TRUE | TRUE  |

---



---

|                 |       |      |       |
|-----------------|-------|------|-------|
| <i>STRADA</i>   | FALSE | TRUE | FALSE |
| <i>GCN1L1</i>   | FALSE | TRUE | TRUE  |
| <i>METTL5</i>   | FALSE | TRUE | TRUE  |
| <i>STAT5A</i>   | FALSE | TRUE | TRUE  |
| <i>PXK</i>      | FALSE | TRUE | TRUE  |
| <i>ESF1</i>     | FALSE | TRUE | TRUE  |
| <i>BRAP</i>     | FALSE | TRUE | TRUE  |
| <i>P4HA1</i>    | FALSE | TRUE | TRUE  |
| <i>MRPL51</i>   | FALSE | TRUE | TRUE  |
| <i>ZNF681</i>   | FALSE | TRUE | TRUE  |
| <i>AP5M1</i>    | FALSE | TRUE | TRUE  |
| <i>POP1</i>     | FALSE | TRUE | TRUE  |
| <i>POP5</i>     | FALSE | TRUE | FALSE |
| <i>POP4</i>     | FALSE | TRUE | TRUE  |
| <i>FKBP2</i>    | FALSE | TRUE | FALSE |
| <i>NF2</i>      | FALSE | TRUE | TRUE  |
| <i>NF1</i>      | FALSE | TRUE | FALSE |
| <i>SMC2</i>     | FALSE | TRUE | TRUE  |
| <i>SMC6</i>     | FALSE | TRUE | TRUE  |
| <i>SFR1</i>     | FALSE | TRUE | TRUE  |
| <i>ARL8B</i>    | FALSE | TRUE | TRUE  |
| <i>ANKRD13C</i> | FALSE | TRUE | TRUE  |
| <i>KPTN</i>     | FALSE | TRUE | FALSE |
| <i>SLC41A2</i>  | FALSE | TRUE | TRUE  |
| <i>DDX50</i>    | FALSE | TRUE | TRUE  |
| <i>RPL7L1</i>   | FALSE | TRUE | TRUE  |
| <i>C11orf82</i> | FALSE | TRUE | TRUE  |
| <i>GTF2A1</i>   | FALSE | TRUE | TRUE  |
| <i>COQ5</i>     | FALSE | TRUE | TRUE  |
| <i>CCNB2</i>    | FALSE | TRUE | TRUE  |
| <i>CCNB1</i>    | FALSE | TRUE | TRUE  |
| <i>COQ3</i>     | FALSE | TRUE | TRUE  |
| <i>COQ2</i>     | FALSE | TRUE | TRUE  |
| <i>CCT4</i>     | FALSE | TRUE | TRUE  |
| <i>CLN5</i>     | FALSE | TRUE | TRUE  |
| <i>RNF181</i>   | FALSE | TRUE | TRUE  |
| <i>ZBTB21</i>   | FALSE | TRUE | TRUE  |
| <i>RIC8A</i>    | FALSE | TRUE | TRUE  |
| <i>BCS1L</i>    | FALSE | TRUE | TRUE  |
| <i>UCHL3</i>    | FALSE | TRUE | TRUE  |
| <i>GFM2</i>     | FALSE | TRUE | TRUE  |
| <i>AIMP1</i>    | FALSE | TRUE | TRUE  |
| <i>MDH1</i>     | FALSE | TRUE | TRUE  |
| <i>VPS33A</i>   | FALSE | TRUE | TRUE  |

---

---

|                 |       |      |       |
|-----------------|-------|------|-------|
| <i>NIF3L1</i>   | FALSE | TRUE | TRUE  |
| <i>TTC9C</i>    | FALSE | TRUE | TRUE  |
| <i>TRMT11</i>   | FALSE | TRUE | TRUE  |
| <i>SNRNP40</i>  | FALSE | TRUE | TRUE  |
| <i>SNAPC3</i>   | FALSE | TRUE | TRUE  |
| <i>METAP1</i>   | FALSE | TRUE | TRUE  |
| <i>LANCL2</i>   | FALSE | TRUE | TRUE  |
| <i>GNPNAT1</i>  | FALSE | TRUE | TRUE  |
| <i>HNRNPH3</i>  | FALSE | TRUE | TRUE  |
| <i>MRPS34</i>   | FALSE | TRUE | TRUE  |
| <i>MRPS36</i>   | FALSE | TRUE | TRUE  |
| <i>TBC1D7</i>   | FALSE | TRUE | TRUE  |
| <i>SEL1L</i>    | FALSE | TRUE | TRUE  |
| <i>PDSS2</i>    | FALSE | TRUE | FALSE |
| <i>OSGIN2</i>   | FALSE | TRUE | TRUE  |
| <i>TRMT10A</i>  | FALSE | TRUE | TRUE  |
| <i>KCTD20</i>   | FALSE | TRUE | TRUE  |
| <i>KCTD21</i>   | FALSE | TRUE | TRUE  |
| <i>FAM96A</i>   | FALSE | TRUE | TRUE  |
| <i>PRPF38A</i>  | FALSE | TRUE | TRUE  |
| <i>RPP38</i>    | FALSE | TRUE | FALSE |
| <i>G3BP1</i>    | FALSE | TRUE | TRUE  |
| <i>CNEP1R1</i>  | FALSE | TRUE | TRUE  |
| <i>WRN</i>      | FALSE | TRUE | TRUE  |
| <i>POLR3F</i>   | FALSE | TRUE | TRUE  |
| <i>UROD</i>     | FALSE | TRUE | FALSE |
| <i>HMMR</i>     | FALSE | TRUE | TRUE  |
| <i>ZDHHC9</i>   | FALSE | TRUE | TRUE  |
| <i>POLQ</i>     | FALSE | TRUE | TRUE  |
| <i>TAF13</i>    | FALSE | TRUE | TRUE  |
| <i>FH</i>       | FALSE | TRUE | TRUE  |
| <i>CDC123</i>   | FALSE | TRUE | TRUE  |
| <i>CYP51A1</i>  | FALSE | TRUE | TRUE  |
| <i>TAF1A</i>    | FALSE | TRUE | TRUE  |
| <i>RYBP</i>     | FALSE | TRUE | TRUE  |
| <i>HSD17B4</i>  | FALSE | TRUE | TRUE  |
| <i>PRMT1</i>    | FALSE | TRUE | TRUE  |
| <i>SPATA5L1</i> | FALSE | TRUE | TRUE  |
| <i>FAM173B</i>  | FALSE | TRUE | TRUE  |
| <i>PROSER1</i>  | FALSE | TRUE | TRUE  |
| <i>CNOT11</i>   | FALSE | TRUE | TRUE  |
| <i>ZWILCH</i>   | FALSE | TRUE | TRUE  |
| <i>PAAF1</i>    | FALSE | TRUE | TRUE  |
| <i>CBX1</i>     | FALSE | TRUE | FALSE |

---

---

|                  |       |      |       |
|------------------|-------|------|-------|
| <i>FASTKD2</i>   | FALSE | TRUE | TRUE  |
| <i>FASTKD3</i>   | FALSE | TRUE | TRUE  |
| <i>BTLA</i>      | FALSE | TRUE | TRUE  |
| <i>WDR24</i>     | FALSE | TRUE | TRUE  |
| <i>WDR25</i>     | FALSE | TRUE | TRUE  |
| <i>SRP72</i>     | FALSE | TRUE | TRUE  |
| <i>LYST</i>      | FALSE | TRUE | TRUE  |
| <i>RQCD1</i>     | FALSE | TRUE | TRUE  |
| <i>PFKM</i>      | FALSE | TRUE | FALSE |
| <i>ECSCR</i>     | FALSE | TRUE | FALSE |
| <i>TAMM41</i>    | FALSE | TRUE | TRUE  |
| <i>ADPGK</i>     | FALSE | TRUE | TRUE  |
| <i>FLVCR1</i>    | FALSE | TRUE | FALSE |
| <i>MKS1</i>      | FALSE | TRUE | FALSE |
| <i>RPAP2</i>     | FALSE | TRUE | TRUE  |
| <i>RPAP3</i>     | FALSE | TRUE | TRUE  |
| <i>RPUSD1</i>    | FALSE | TRUE | TRUE  |
| <i>TP53RK</i>    | FALSE | TRUE | TRUE  |
| <i>DPM1</i>      | FALSE | TRUE | TRUE  |
| <i>SUV39H1</i>   | FALSE | TRUE | TRUE  |
| <i>SCO2</i>      | FALSE | TRUE | TRUE  |
| <i>MMADHC</i>    | FALSE | TRUE | TRUE  |
| <i>TDP2</i>      | FALSE | TRUE | TRUE  |
| <i>FAM175B</i>   | FALSE | TRUE | TRUE  |
| <i>C14orf166</i> | FALSE | TRUE | TRUE  |
| <i>TMED8</i>     | FALSE | TRUE | TRUE  |
| <i>HNRNPK</i>    | FALSE | TRUE | TRUE  |
| <i>HNRNPC</i>    | FALSE | TRUE | FALSE |
| <i>SLC25A3</i>   | FALSE | TRUE | TRUE  |
| <i>UPF3B</i>     | FALSE | TRUE | TRUE  |
| <i>DOK1</i>      | FALSE | TRUE | TRUE  |
| <i>PLS1</i>      | FALSE | TRUE | TRUE  |
| <i>CLASP2</i>    | FALSE | TRUE | TRUE  |
| <i>CLASP1</i>    | FALSE | TRUE | TRUE  |
| <i>PDIA3</i>     | FALSE | TRUE | TRUE  |
| <i>ARMC5</i>     | FALSE | TRUE | TRUE  |
| <i>ARMC1</i>     | FALSE | TRUE | TRUE  |
| <i>AARS</i>      | FALSE | TRUE | TRUE  |
| <i>SPATA5</i>    | FALSE | TRUE | TRUE  |
| <i>HSPA9</i>     | FALSE | TRUE | TRUE  |
| <i>CLEC2D</i>    | FALSE | TRUE | FALSE |
| <i>TSG101</i>    | FALSE | TRUE | TRUE  |
| <i>TTK</i>       | FALSE | TRUE | TRUE  |
| <i>GARS</i>      | FALSE | TRUE | TRUE  |

---

---

|                |       |      |       |
|----------------|-------|------|-------|
| <i>ATAD1</i>   | FALSE | TRUE | TRUE  |
| <i>TMEM199</i> | FALSE | TRUE | TRUE  |
| <i>MIOS</i>    | FALSE | TRUE | TRUE  |
| <i>HOMER1</i>  | FALSE | TRUE | TRUE  |
| <i>THAP6</i>   | FALSE | TRUE | FALSE |
| <i>AHCTF1</i>  | FALSE | TRUE | TRUE  |
| <i>CHM</i>     | FALSE | TRUE | TRUE  |
| <i>TAF5L</i>   | FALSE | TRUE | TRUE  |
| <i>MED6</i>    | FALSE | TRUE | TRUE  |
| <i>MED8</i>    | FALSE | TRUE | TRUE  |
| <i>KXD1</i>    | FALSE | TRUE | TRUE  |
| <i>SNRPA1</i>  | FALSE | TRUE | FALSE |
| <i>RPS6KB2</i> | FALSE | TRUE | FALSE |
| <i>UTP18</i>   | FALSE | TRUE | TRUE  |
| <i>LACCI</i>   | FALSE | TRUE | TRUE  |
| <i>DCAF7</i>   | FALSE | TRUE | TRUE  |
| <i>POLR3G</i>  | FALSE | TRUE | FALSE |
| <i>POLR3B</i>  | FALSE | TRUE | TRUE  |
| <i>R3HDM1</i>  | FALSE | TRUE | FALSE |
| <i>PRMT5</i>   | FALSE | TRUE | TRUE  |
| <i>ORMDL2</i>  | FALSE | TRUE | TRUE  |
| <i>CD200</i>   | FALSE | TRUE | TRUE  |
| <i>IARS2</i>   | FALSE | TRUE | TRUE  |
| <i>CANX</i>    | FALSE | TRUE | FALSE |
| <i>SCRN3</i>   | FALSE | TRUE | TRUE  |
| <i>TMEM206</i> | FALSE | TRUE | TRUE  |
| <i>TMEM208</i> | FALSE | TRUE | TRUE  |
| <i>VPRBP</i>   | FALSE | TRUE | TRUE  |
| <i>SLC35B1</i> | FALSE | TRUE | FALSE |
| <i>SMARCB1</i> | FALSE | TRUE | TRUE  |
| <i>HAVCR2</i>  | FALSE | TRUE | TRUE  |
| <i>MTBP</i>    | FALSE | TRUE | TRUE  |
| <i>MAFK</i>    | FALSE | TRUE | TRUE  |
| <i>WDR55</i>   | FALSE | TRUE | TRUE  |
| <i>ARPC1A</i>  | FALSE | TRUE | TRUE  |
| <i>ACSL4</i>   | FALSE | TRUE | TRUE  |
| <i>INTS6</i>   | FALSE | TRUE | TRUE  |
| <i>ZNF585A</i> | FALSE | TRUE | TRUE  |
| <i>RCN2</i>    | FALSE | TRUE | TRUE  |
| <i>ACO1</i>    | FALSE | TRUE | TRUE  |
| <i>PBK</i>     | FALSE | TRUE | FALSE |
| <i>ZNF620</i>  | FALSE | TRUE | TRUE  |
| <i>ZNF622</i>  | FALSE | TRUE | TRUE  |
| <i>PRPF19</i>  | FALSE | TRUE | TRUE  |

---

---

|                 |       |      |       |
|-----------------|-------|------|-------|
| <i>POLR1A</i>   | FALSE | TRUE | TRUE  |
| <i>POLR1C</i>   | FALSE | TRUE | TRUE  |
| <i>C5orf15</i>  | FALSE | TRUE | TRUE  |
| <i>ASH2L</i>    | FALSE | TRUE | TRUE  |
| <i>KIF21A</i>   | FALSE | TRUE | TRUE  |
| <i>IL21R</i>    | FALSE | TRUE | TRUE  |
| <i>NARG2</i>    | FALSE | TRUE | TRUE  |
| <i>TMEM222</i>  | FALSE | TRUE | TRUE  |
| <i>HEATR6</i>   | FALSE | TRUE | FALSE |
| <i>HEATR1</i>   | FALSE | TRUE | TRUE  |
| <i>NUP35</i>    | FALSE | TRUE | TRUE  |
| <i>NUP37</i>    | FALSE | TRUE | FALSE |
| <i>MIPEP</i>    | FALSE | TRUE | TRUE  |
| <i>CACUL1</i>   | FALSE | TRUE | TRUE  |
| <i>NABP2</i>    | FALSE | TRUE | TRUE  |
| <i>NOMO2</i>    | FALSE | TRUE | FALSE |
| <i>BAZ1A</i>    | FALSE | TRUE | TRUE  |
| <i>MAP2K4P1</i> | FALSE | TRUE | TRUE  |
| <i>CCAR1</i>    | FALSE | TRUE | TRUE  |
| <i>CCAR2</i>    | FALSE | TRUE | TRUE  |
| <i>VKORC1</i>   | FALSE | TRUE | TRUE  |
| <i>OXSM</i>     | FALSE | TRUE | TRUE  |
| <i>DNAJC15</i>  | FALSE | TRUE | TRUE  |
| <i>LMAN2</i>    | FALSE | TRUE | FALSE |
| <i>PFKFB2</i>   | FALSE | TRUE | TRUE  |
| <i>HNRNPD</i>   | FALSE | TRUE | TRUE  |
| <i>PPP4R2</i>   | FALSE | TRUE | TRUE  |
| <i>NUP214</i>   | FALSE | TRUE | TRUE  |
| <i>IDH1</i>     | FALSE | TRUE | TRUE  |
| <i>SETD3</i>    | FALSE | TRUE | TRUE  |
| <i>SETD7</i>    | FALSE | TRUE | TRUE  |
| <i>STX1A</i>    | FALSE | TRUE | TRUE  |
| <i>FARS2</i>    | FALSE | TRUE | FALSE |
| <i>BTBD10</i>   | FALSE | TRUE | TRUE  |
| <i>MASTL</i>    | FALSE | TRUE | TRUE  |
| <i>TSEN2</i>    | FALSE | TRUE | TRUE  |
| <i>C19orf82</i> | FALSE | TRUE | TRUE  |
| <i>MAST2</i>    | FALSE | TRUE | FALSE |
| <i>C5orf34</i>  | FALSE | TRUE | TRUE  |
| <i>STX12</i>    | FALSE | TRUE | TRUE  |
| <i>APOPT1</i>   | FALSE | TRUE | TRUE  |
| <i>TMEM167A</i> | FALSE | TRUE | TRUE  |
| <i>TRMT61B</i>  | FALSE | TRUE | TRUE  |
| <i>MUM1</i>     | FALSE | TRUE | TRUE  |

---

---

|                 |       |      |       |
|-----------------|-------|------|-------|
| <i>BRAT1</i>    | FALSE | TRUE | TRUE  |
| <i>STMN1</i>    | FALSE | TRUE | FALSE |
| <i>FAM161A</i>  | FALSE | TRUE | TRUE  |
| <i>GTF2H1</i>   | FALSE | TRUE | TRUE  |
| <i>MTFR1</i>    | FALSE | TRUE | TRUE  |
| <i>MTFR2</i>    | FALSE | TRUE | TRUE  |
| <i>NAA20</i>    | FALSE | TRUE | TRUE  |
| <i>SGCB</i>     | FALSE | TRUE | TRUE  |
| <i>DUSP2</i>    | FALSE | TRUE | FALSE |
| <i>IKBKAP</i>   | FALSE | TRUE | TRUE  |
| <i>NPM3</i>     | FALSE | TRUE | FALSE |
| <i>SCFD1</i>    | FALSE | TRUE | TRUE  |
| <i>PPP3R1</i>   | FALSE | TRUE | TRUE  |
| <i>FAM222B</i>  | FALSE | TRUE | TRUE  |
| <i>SERP1</i>    | FALSE | TRUE | TRUE  |
| <i>PUS7L</i>    | FALSE | TRUE | TRUE  |
| <i>BNIP1</i>    | FALSE | TRUE | TRUE  |
| <i>SDF2</i>     | FALSE | TRUE | TRUE  |
| <i>EMC2</i>     | FALSE | TRUE | TRUE  |
| <i>SNX12</i>    | FALSE | TRUE | TRUE  |
| <i>C17orf80</i> | FALSE | TRUE | TRUE  |
| <i>TNKS1BP1</i> | FALSE | TRUE | TRUE  |
| <i>SPCS1</i>    | FALSE | TRUE | FALSE |
| <i>DHFRL1</i>   | FALSE | TRUE | FALSE |
| <i>SLC38A1</i>  | FALSE | TRUE | FALSE |
| <i>WDR89</i>    | FALSE | TRUE | TRUE  |
| <i>CENPJ</i>    | FALSE | TRUE | TRUE  |
| <i>SIMC1</i>    | FALSE | TRUE | TRUE  |
| <i>WDHD1</i>    | FALSE | TRUE | TRUE  |
| <i>ZNF764</i>   | FALSE | TRUE | TRUE  |
| <i>FAM185A</i>  | FALSE | TRUE | TRUE  |
| <i>PUS3</i>     | FALSE | TRUE | FALSE |
| <i>PHF14</i>    | FALSE | TRUE | TRUE  |
| <i>POLA1</i>    | FALSE | TRUE | FALSE |
| <i>RB1</i>      | FALSE | TRUE | TRUE  |
| <i>CUL4A</i>    | FALSE | TRUE | TRUE  |
| <i>C8orf33</i>  | FALSE | TRUE | TRUE  |
| <i>NDUFB6</i>   | FALSE | TRUE | TRUE  |
| <i>NDUFB5</i>   | FALSE | TRUE | TRUE  |
| <i>TMOD3</i>    | FALSE | TRUE | TRUE  |
| <i>ANKRD40</i>  | FALSE | TRUE | FALSE |
| <i>ANKRD42</i>  | FALSE | TRUE | TRUE  |
| <i>MED20</i>    | FALSE | TRUE | TRUE  |
| <i>RBM34</i>    | FALSE | TRUE | TRUE  |

---

---

|                  |       |      |       |
|------------------|-------|------|-------|
| <i>YARS</i>      | FALSE | TRUE | TRUE  |
| <i>BCCIP</i>     | FALSE | TRUE | TRUE  |
| <i>NVL</i>       | FALSE | TRUE | TRUE  |
| <i>ZNF35</i>     | FALSE | TRUE | TRUE  |
| <i>ZNF30</i>     | FALSE | TRUE | TRUE  |
| <i>C21orf59</i>  | FALSE | TRUE | TRUE  |
| <i>PUS10</i>     | FALSE | TRUE | TRUE  |
| <i>UGGT1</i>     | FALSE | TRUE | TRUE  |
| <i>RAD51C</i>    | FALSE | TRUE | TRUE  |
| <i>DIP2B</i>     | FALSE | TRUE | FALSE |
| <i>DCLRE1B</i>   | FALSE | TRUE | FALSE |
| <i>ECT2</i>      | FALSE | TRUE | TRUE  |
| <i>ZCCHC4</i>    | FALSE | TRUE | TRUE  |
| <i>MRPS31</i>    | FALSE | TRUE | TRUE  |
| <i>ADPRHL2</i>   | FALSE | TRUE | TRUE  |
| <i>DARS</i>      | FALSE | TRUE | TRUE  |
| <i>LYPLA2</i>    | FALSE | TRUE | TRUE  |
| <i>RPE</i>       | FALSE | TRUE | TRUE  |
| <i>SPAG5</i>     | FALSE | TRUE | TRUE  |
| <i>SPAG1</i>     | FALSE | TRUE | TRUE  |
| <i>KLHL7</i>     | FALSE | TRUE | FALSE |
| <i>KLHL2</i>     | FALSE | TRUE | TRUE  |
| <i>KDELRI</i>    | FALSE | TRUE | FALSE |
| <i>ST13</i>      | FALSE | TRUE | TRUE  |
| <i>LOC728554</i> | FALSE | TRUE | TRUE  |
| <i>MPV17L2</i>   | FALSE | TRUE | TRUE  |
| <i>YAE1D1</i>    | FALSE | TRUE | TRUE  |
| <i>AVL9</i>      | FALSE | TRUE | TRUE  |
| <i>DPY19L3</i>   | FALSE | TRUE | FALSE |
| <i>TMEM39B</i>   | FALSE | TRUE | TRUE  |
| <i>RNLS</i>      | FALSE | TRUE | FALSE |
| <i>FKBP4</i>     | FALSE | TRUE | TRUE  |
| <i>SEC23IP</i>   | FALSE | TRUE | TRUE  |
| <i>MANF</i>      | FALSE | TRUE | TRUE  |
| <i>SAMD1</i>     | FALSE | TRUE | TRUE  |
| <i>GM2A</i>      | FALSE | TRUE | TRUE  |
| <i>HSD17B10</i>  | FALSE | TRUE | FALSE |
| <i>PANK3</i>     | FALSE | TRUE | TRUE  |
| <i>HEATR5A</i>   | FALSE | TRUE | TRUE  |
| <i>SARS</i>      | FALSE | TRUE | TRUE  |
| <i>BEND3</i>     | FALSE | TRUE | TRUE  |
| <i>CXorf21</i>   | FALSE | TRUE | FALSE |
| <i>SUCLA2</i>    | FALSE | TRUE | TRUE  |
| <i>RFT1</i>      | FALSE | TRUE | TRUE  |

---

---

|                 |       |       |       |
|-----------------|-------|-------|-------|
| <i>HARB1</i>    | FALSE | TRUE  | TRUE  |
| <i>MT2A</i>     | FALSE | TRUE  | TRUE  |
| <i>PSMD5</i>    | FALSE | TRUE  | FALSE |
| <i>PSMD7</i>    | FALSE | TRUE  | TRUE  |
| <i>PSMD6</i>    | FALSE | TRUE  | TRUE  |
| <i>RPGRIP1L</i> | FALSE | TRUE  | TRUE  |
| <i>AASDHPPT</i> | FALSE | TRUE  | TRUE  |
| <i>TGDS</i>     | FALSE | TRUE  | TRUE  |
| <i>UPRT</i>     | FALSE | TRUE  | TRUE  |
| <i>FAM213B</i>  | FALSE | TRUE  | TRUE  |
| <i>RBBP8</i>    | FALSE | TRUE  | TRUE  |
| <i>HPSE</i>     | FALSE | TRUE  | TRUE  |
| <i>IAH1</i>     | FALSE | TRUE  | TRUE  |
| <i>YIPF4</i>    | FALSE | TRUE  | TRUE  |
| <i>FTSJ2</i>    | FALSE | TRUE  | TRUE  |
| <i>FTSJ3</i>    | FALSE | TRUE  | FALSE |
| <i>SHFM1</i>    | FALSE | TRUE  | FALSE |
| <i>FXR2</i>     | FALSE | TRUE  | TRUE  |
| <i>CST7</i>     | FALSE | TRUE  | FALSE |
| <i>AMIGO2</i>   | FALSE | TRUE  | TRUE  |
| <i>RNF34</i>    | FALSE | TRUE  | TRUE  |
| <i>INTS2</i>    | FALSE | TRUE  | FALSE |
| <i>INTS5</i>    | FALSE | TRUE  | TRUE  |
| <i>INTS4</i>    | FALSE | TRUE  | TRUE  |
| <i>MPP5</i>     | FALSE | TRUE  | TRUE  |
| <i>ETFDH</i>    | FALSE | TRUE  | TRUE  |
| <i>GBP2</i>     | FALSE | TRUE  | TRUE  |
| <i>CCDC134</i>  | FALSE | TRUE  | TRUE  |
| <i>RBFOX2</i>   | FALSE | TRUE  | TRUE  |
| <i>CHRNA1</i>   | FALSE | TRUE  | TRUE  |
| <i>MAP2K3</i>   | FALSE | TRUE  | TRUE  |
| <i>MAP2K4</i>   | FALSE | TRUE  | TRUE  |
| <i>PHF8</i>     | FALSE | TRUE  | TRUE  |
| <i>SMARCA1</i>  | FALSE | TRUE  | TRUE  |
| <i>PRKARIA</i>  | FALSE | TRUE  | TRUE  |
| <i>GOLGA2</i>   | FALSE | TRUE  | TRUE  |
| <i>PHF20L1</i>  | FALSE | TRUE  | TRUE  |
| <i>CAND1</i>    | FALSE | TRUE  | TRUE  |
| <i>PRPS1</i>    | FALSE | TRUE  | TRUE  |
| <i>C1orf198</i> | FALSE | TRUE  | TRUE  |
| <i>SELT</i>     | FALSE | TRUE  | TRUE  |
| <i>AARS2</i>    | FALSE | FALSE | TRUE  |
| <i>ABCB7</i>    | FALSE | FALSE | TRUE  |
| <i>ABCD3</i>    | FALSE | FALSE | TRUE  |

---



---

|                 |       |       |      |
|-----------------|-------|-------|------|
| <i>ABCE1</i>    | FALSE | FALSE | TRUE |
| <i>ABHD11</i>   | FALSE | FALSE | TRUE |
| <i>ABHD5</i>    | FALSE | FALSE | TRUE |
| <i>ABI3</i>     | FALSE | FALSE | TRUE |
| <i>ACADM</i>    | FALSE | FALSE | TRUE |
| <i>ACAT2</i>    | FALSE | FALSE | TRUE |
| <i>ACN9</i>     | FALSE | FALSE | TRUE |
| <i>ACO2</i>     | FALSE | FALSE | TRUE |
| <i>ACOT13</i>   | FALSE | FALSE | TRUE |
| <i>ACOT7</i>    | FALSE | FALSE | TRUE |
| <i>ACOT9</i>    | FALSE | FALSE | TRUE |
| <i>ACPI</i>     | FALSE | FALSE | TRUE |
| <i>ACSL1</i>    | FALSE | FALSE | TRUE |
| <i>ACSL3</i>    | FALSE | FALSE | TRUE |
| <i>ACTR10</i>   | FALSE | FALSE | TRUE |
| <i>ACTR1A</i>   | FALSE | FALSE | TRUE |
| <i>ACTR3</i>    | FALSE | FALSE | TRUE |
| <i>ACTR3B</i>   | FALSE | FALSE | TRUE |
| <i>ACTR8</i>    | FALSE | FALSE | TRUE |
| <i>ADAM9</i>    | FALSE | FALSE | TRUE |
| <i>ADAP1</i>    | FALSE | FALSE | TRUE |
| <i>ADAT2</i>    | FALSE | FALSE | TRUE |
| <i>ADH5</i>     | FALSE | FALSE | TRUE |
| <i>ADIPOR2</i>  | FALSE | FALSE | TRUE |
| <i>ADSL</i>     | FALSE | FALSE | TRUE |
| <i>AFG3L2</i>   | FALSE | FALSE | TRUE |
| <i>AGGF1</i>    | FALSE | FALSE | TRUE |
| <i>AGK</i>      | FALSE | FALSE | TRUE |
| <i>AGO2</i>     | FALSE | FALSE | TRUE |
| <i>AGPAT3</i>   | FALSE | FALSE | TRUE |
| <i>AGPAT5</i>   | FALSE | FALSE | TRUE |
| <i>AHR</i>      | FALSE | FALSE | TRUE |
| <i>AK6</i>      | FALSE | FALSE | TRUE |
| <i>AKAP1</i>    | FALSE | FALSE | TRUE |
| <i>AKIP1</i>    | FALSE | FALSE | TRUE |
| <i>ALCAM</i>    | FALSE | FALSE | TRUE |
| <i>ALDH4A1</i>  | FALSE | FALSE | TRUE |
| <i>ALG13</i>    | FALSE | FALSE | TRUE |
| <i>ALG14</i>    | FALSE | FALSE | TRUE |
| <i>ALKBH1</i>   | FALSE | FALSE | TRUE |
| <i>ALYREF</i>   | FALSE | FALSE | TRUE |
| <i>AMD1</i>     | FALSE | FALSE | TRUE |
| <i>AMMECR1L</i> | FALSE | FALSE | TRUE |
| <i>AMPD2</i>    | FALSE | FALSE | TRUE |

---

---

|                 |       |       |      |
|-----------------|-------|-------|------|
| <i>ANAPC10</i>  | FALSE | FALSE | TRUE |
| <i>ANKRD17</i>  | FALSE | FALSE | TRUE |
| <i>ANKRD33B</i> | FALSE | FALSE | TRUE |
| <i>ANKRD46</i>  | FALSE | FALSE | TRUE |
| <i>ANKRD54</i>  | FALSE | FALSE | TRUE |
| <i>ANKS1A</i>   | FALSE | FALSE | TRUE |
| <i>ANP32A</i>   | FALSE | FALSE | TRUE |
| <i>APIAR</i>    | FALSE | FALSE | TRUE |
| <i>AP3B1</i>    | FALSE | FALSE | TRUE |
| <i>AP3M1</i>    | FALSE | FALSE | TRUE |
| <i>AP4B1</i>    | FALSE | FALSE | TRUE |
| <i>APEX1</i>    | FALSE | FALSE | TRUE |
| <i>APEX2</i>    | FALSE | FALSE | TRUE |
| <i>APIP</i>     | FALSE | FALSE | TRUE |
| <i>APOL2</i>    | FALSE | FALSE | TRUE |
| <i>APOO</i>     | FALSE | FALSE | TRUE |
| <i>APOOL</i>    | FALSE | FALSE | TRUE |
| <i>AQR</i>      | FALSE | FALSE | TRUE |
| <i>ARCNI</i>    | FALSE | FALSE | TRUE |
| <i>ARF1</i>     | FALSE | FALSE | TRUE |
| <i>ARF4</i>     | FALSE | FALSE | TRUE |
| <i>ARFIP1</i>   | FALSE | FALSE | TRUE |
| <i>ARG2</i>     | FALSE | FALSE | TRUE |
| <i>ARHGAP31</i> | FALSE | FALSE | TRUE |
| <i>ARHGEF12</i> | FALSE | FALSE | TRUE |
| <i>ARID5A</i>   | FALSE | FALSE | TRUE |
| <i>ARL13B</i>   | FALSE | FALSE | TRUE |
| <i>ARL3</i>     | FALSE | FALSE | TRUE |
| <i>ARL5B</i>    | FALSE | FALSE | TRUE |
| <i>ARMC10</i>   | FALSE | FALSE | TRUE |
| <i>ARMC8</i>    | FALSE | FALSE | TRUE |
| <i>ARMCX6</i>   | FALSE | FALSE | TRUE |
| <i>ARNTL2</i>   | FALSE | FALSE | TRUE |
| <i>ARV1</i>     | FALSE | FALSE | TRUE |
| <i>ASAH2B</i>   | FALSE | FALSE | TRUE |
| <i>ASNSD1</i>   | FALSE | FALSE | TRUE |
| <i>ASPHD2</i>   | FALSE | FALSE | TRUE |
| <i>ATE1</i>     | FALSE | FALSE | TRUE |
| <i>ATF2</i>     | FALSE | FALSE | TRUE |
| <i>ATG101</i>   | FALSE | FALSE | TRUE |
| <i>ATG3</i>     | FALSE | FALSE | TRUE |
| <i>ATG4A</i>    | FALSE | FALSE | TRUE |
| <i>ATG4C</i>    | FALSE | FALSE | TRUE |
| <i>ATG5</i>     | FALSE | FALSE | TRUE |

---

---

|                 |       |       |      |
|-----------------|-------|-------|------|
| <i>ATL2</i>     | FALSE | FALSE | TRUE |
| <i>ATP2A2</i>   | FALSE | FALSE | TRUE |
| <i>ATP2C1</i>   | FALSE | FALSE | TRUE |
| <i>ATP5A1</i>   | FALSE | FALSE | TRUE |
| <i>ATP5B</i>    | FALSE | FALSE | TRUE |
| <i>ATP5C1</i>   | FALSE | FALSE | TRUE |
| <i>ATP5F1</i>   | FALSE | FALSE | TRUE |
| <i>ATP5G3</i>   | FALSE | FALSE | TRUE |
| <i>ATP6V0A1</i> | FALSE | FALSE | TRUE |
| <i>ATP6V0E1</i> | FALSE | FALSE | TRUE |
| <i>ATP6V1A</i>  | FALSE | FALSE | TRUE |
| <i>ATP6V1B2</i> | FALSE | FALSE | TRUE |
| <i>ATP6V1D</i>  | FALSE | FALSE | TRUE |
| <i>ATP6V1E1</i> | FALSE | FALSE | TRUE |
| <i>ATP6V1F</i>  | FALSE | FALSE | TRUE |
| <i>ATP6V1H</i>  | FALSE | FALSE | TRUE |
| <i>AURKA</i>    | FALSE | FALSE | TRUE |
| <i>AVEN</i>     | FALSE | FALSE | TRUE |
| <i>AZIN1</i>    | FALSE | FALSE | TRUE |
| <i>B4GALT2</i>  | FALSE | FALSE | TRUE |
| <i>B4GALT4</i>  | FALSE | FALSE | TRUE |
| <i>B4GALT5</i>  | FALSE | FALSE | TRUE |
| <i>B4GALT7</i>  | FALSE | FALSE | TRUE |
| <i>BACH2</i>    | FALSE | FALSE | TRUE |
| <i>BAK1</i>     | FALSE | FALSE | TRUE |
| <i>BANF1</i>    | FALSE | FALSE | TRUE |
| <i>BATF</i>     | FALSE | FALSE | TRUE |
| <i>BBIP1</i>    | FALSE | FALSE | TRUE |
| <i>BBS10</i>    | FALSE | FALSE | TRUE |
| <i>BBS7</i>     | FALSE | FALSE | TRUE |
| <i>BCAS2</i>    | FALSE | FALSE | TRUE |
| <i>BCL2L11</i>  | FALSE | FALSE | TRUE |
| <i>BCOR</i>     | FALSE | FALSE | TRUE |
| <i>BCORL1</i>   | FALSE | FALSE | TRUE |
| <i>BIK</i>      | FALSE | FALSE | TRUE |
| <i>BLMH</i>     | FALSE | FALSE | TRUE |
| <i>BLOC1S2</i>  | FALSE | FALSE | TRUE |
| <i>BLVRB</i>    | FALSE | FALSE | TRUE |
| <i>BMP2K</i>    | FALSE | FALSE | TRUE |
| <i>BNIP3</i>    | FALSE | FALSE | TRUE |
| <i>BORA</i>     | FALSE | FALSE | TRUE |
| <i>BRAF</i>     | FALSE | FALSE | TRUE |
| <i>BRCC3</i>    | FALSE | FALSE | TRUE |
| <i>BRD7</i>     | FALSE | FALSE | TRUE |

---

---

|                  |       |       |      |
|------------------|-------|-------|------|
| <i>BRI3BP</i>    | FALSE | FALSE | TRUE |
| <i>BRK1</i>      | FALSE | FALSE | TRUE |
| <i>BRMS1</i>     | FALSE | FALSE | TRUE |
| <i>BTF3L4</i>    | FALSE | FALSE | TRUE |
| <i>BTRC</i>      | FALSE | FALSE | TRUE |
| <i>BUB1B</i>     | FALSE | FALSE | TRUE |
| <i>BUD31</i>     | FALSE | FALSE | TRUE |
| <i>BZW1</i>      | FALSE | FALSE | TRUE |
| <i>BZW2</i>      | FALSE | FALSE | TRUE |
| <i>C10orf2</i>   | FALSE | FALSE | TRUE |
| <i>C11orf24</i>  | FALSE | FALSE | TRUE |
| <i>C11orf54</i>  | FALSE | FALSE | TRUE |
| <i>C11orf57</i>  | FALSE | FALSE | TRUE |
| <i>C11orf58</i>  | FALSE | FALSE | TRUE |
| <i>C11orf73</i>  | FALSE | FALSE | TRUE |
| <i>C11orf84</i>  | FALSE | FALSE | TRUE |
| <i>C11orf95</i>  | FALSE | FALSE | TRUE |
| <i>C12orf29</i>  | FALSE | FALSE | TRUE |
| <i>C12orf5</i>   | FALSE | FALSE | TRUE |
| <i>C14orf142</i> | FALSE | FALSE | TRUE |
| <i>C15orf57</i>  | FALSE | FALSE | TRUE |
| <i>C16orf80</i>  | FALSE | FALSE | TRUE |
| <i>C17orf85</i>  | FALSE | FALSE | TRUE |
| <i>C18orf21</i>  | FALSE | FALSE | TRUE |
| <i>C1D</i>       | FALSE | FALSE | TRUE |
| <i>C1GALT1C1</i> | FALSE | FALSE | TRUE |
| <i>C2orf43</i>   | FALSE | FALSE | TRUE |
| <i>C2orf47</i>   | FALSE | FALSE | TRUE |
| <i>C2orf76</i>   | FALSE | FALSE | TRUE |
| <i>C4orf32</i>   | FALSE | FALSE | TRUE |
| <i>C5orf22</i>   | FALSE | FALSE | TRUE |
| <i>C5orf28</i>   | FALSE | FALSE | TRUE |
| <i>C5orf51</i>   | FALSE | FALSE | TRUE |
| <i>C6orf203</i>  | FALSE | FALSE | TRUE |
| <i>C7orf50</i>   | FALSE | FALSE | TRUE |
| <i>C9orf40</i>   | FALSE | FALSE | TRUE |
| <i>C9orf64</i>   | FALSE | FALSE | TRUE |
| <i>C9orf69</i>   | FALSE | FALSE | TRUE |
| <i>C9orf85</i>   | FALSE | FALSE | TRUE |
| <i>CAB39</i>     | FALSE | FALSE | TRUE |
| <i>CABLES1</i>   | FALSE | FALSE | TRUE |
| <i>CABLES2</i>   | FALSE | FALSE | TRUE |
| <i>CALR</i>      | FALSE | FALSE | TRUE |
| <i>CAMK1</i>     | FALSE | FALSE | TRUE |

---

---

|                   |       |       |      |
|-------------------|-------|-------|------|
| <i>CAMSAP1</i>    | FALSE | FALSE | TRUE |
| <i>CAMTA1</i>     | FALSE | FALSE | TRUE |
| <i>CANT1</i>      | FALSE | FALSE | TRUE |
| <i>CAPZA1</i>     | FALSE | FALSE | TRUE |
| <i>CAPZA2</i>     | FALSE | FALSE | TRUE |
| <i>CASC3</i>      | FALSE | FALSE | TRUE |
| <i>CBLN3</i>      | FALSE | FALSE | TRUE |
| <i>CBR4</i>       | FALSE | FALSE | TRUE |
| <i>CBX6</i>       | FALSE | FALSE | TRUE |
| <i>CCDC12</i>     | FALSE | FALSE | TRUE |
| <i>CCDC126</i>    | FALSE | FALSE | TRUE |
| <i>CCDC127</i>    | FALSE | FALSE | TRUE |
| <i>CCDC132</i>    | FALSE | FALSE | TRUE |
| <i>CCDC43</i>     | FALSE | FALSE | TRUE |
| <i>CCDC59</i>     | FALSE | FALSE | TRUE |
| <i>CCDC90B</i>    | FALSE | FALSE | TRUE |
| <i>CCDC94</i>     | FALSE | FALSE | TRUE |
| <i>CCND2</i>      | FALSE | FALSE | TRUE |
| <i>CCNH</i>       | FALSE | FALSE | TRUE |
| <i>CCNI2</i>      | FALSE | FALSE | TRUE |
| <i>CCNK</i>       | FALSE | FALSE | TRUE |
| <i>CCNYL1</i>     | FALSE | FALSE | TRUE |
| <i>CCP110</i>     | FALSE | FALSE | TRUE |
| <i>CCR4</i>       | FALSE | FALSE | TRUE |
| <i>CCRN4L</i>     | FALSE | FALSE | TRUE |
| <i>CCT2</i>       | FALSE | FALSE | TRUE |
| <i>CCZ1</i>       | FALSE | FALSE | TRUE |
| <i>CD109</i>      | FALSE | FALSE | TRUE |
| <i>CD164</i>      | FALSE | FALSE | TRUE |
| <i>CD2AP</i>      | FALSE | FALSE | TRUE |
| <i>CD3EAP</i>     | FALSE | FALSE | TRUE |
| <i>CD40LG</i>     | FALSE | FALSE | TRUE |
| <i>CD6</i>        | FALSE | FALSE | TRUE |
| <i>CD82</i>       | FALSE | FALSE | TRUE |
| <i>CDC23</i>      | FALSE | FALSE | TRUE |
| <i>CDC34</i>      | FALSE | FALSE | TRUE |
| <i>CDC5L</i>      | FALSE | FALSE | TRUE |
| <i>CDCA7L</i>     | FALSE | FALSE | TRUE |
| <i>CDK1</i>       | FALSE | FALSE | TRUE |
| <i>CDK2AP2</i>    | FALSE | FALSE | TRUE |
| <i>CDK8</i>       | FALSE | FALSE | TRUE |
| <i>CDKAL1</i>     | FALSE | FALSE | TRUE |
| <i>CDKN1A</i>     | FALSE | FALSE | TRUE |
| <i>CDKN2AIPNL</i> | FALSE | FALSE | TRUE |

---

---

|                |       |       |      |
|----------------|-------|-------|------|
| <i>CDV3</i>    | FALSE | FALSE | TRUE |
| <i>CEBPG</i>   | FALSE | FALSE | TRUE |
| <i>CEBPZ</i>   | FALSE | FALSE | TRUE |
| <i>CENPQ</i>   | FALSE | FALSE | TRUE |
| <i>CENPW</i>   | FALSE | FALSE | TRUE |
| <i>CEP104</i>  | FALSE | FALSE | TRUE |
| <i>CEP19</i>   | FALSE | FALSE | TRUE |
| <i>CEP41</i>   | FALSE | FALSE | TRUE |
| <i>CEP57L1</i> | FALSE | FALSE | TRUE |
| <i>CEP97</i>   | FALSE | FALSE | TRUE |
| <i>CEPT1</i>   | FALSE | FALSE | TRUE |
| <i>CHCHD1</i>  | FALSE | FALSE | TRUE |
| <i>CHD4</i>    | FALSE | FALSE | TRUE |
| <i>CHKA</i>    | FALSE | FALSE | TRUE |
| <i>CHMP1A</i>  | FALSE | FALSE | TRUE |
| <i>CHMP2A</i>  | FALSE | FALSE | TRUE |
| <i>CHMP2B</i>  | FALSE | FALSE | TRUE |
| <i>CHMP5</i>   | FALSE | FALSE | TRUE |
| <i>CHN1</i>    | FALSE | FALSE | TRUE |
| <i>CHORDC1</i> | FALSE | FALSE | TRUE |
| <i>CHPF</i>    | FALSE | FALSE | TRUE |
| <i>CHUK</i>    | FALSE | FALSE | TRUE |
| <i>CIAPIN1</i> | FALSE | FALSE | TRUE |
| <i>CINP</i>    | FALSE | FALSE | TRUE |
| <i>CISD1</i>   | FALSE | FALSE | TRUE |
| <i>CISD2</i>   | FALSE | FALSE | TRUE |
| <i>CKS2</i>    | FALSE | FALSE | TRUE |
| <i>CLDND1</i>  | FALSE | FALSE | TRUE |
| <i>CLINT1</i>  | FALSE | FALSE | TRUE |
| <i>CLN8</i>    | FALSE | FALSE | TRUE |
| <i>CLNS1A</i>  | FALSE | FALSE | TRUE |
| <i>CLP1</i>    | FALSE | FALSE | TRUE |
| <i>CLPX</i>    | FALSE | FALSE | TRUE |
| <i>CLTA</i>    | FALSE | FALSE | TRUE |
| <i>CLTC</i>    | FALSE | FALSE | TRUE |
| <i>CMAS</i>    | FALSE | FALSE | TRUE |
| <i>CMC2</i>    | FALSE | FALSE | TRUE |
| <i>CMTM6</i>   | FALSE | FALSE | TRUE |
| <i>CNIH1</i>   | FALSE | FALSE | TRUE |
| <i>CNIH4</i>   | FALSE | FALSE | TRUE |
| <i>CNKS2</i>   | FALSE | FALSE | TRUE |
| <i>CNOT1</i>   | FALSE | FALSE | TRUE |
| <i>CNOT10</i>  | FALSE | FALSE | TRUE |
| <i>CNP</i>     | FALSE | FALSE | TRUE |

---

---

|                 |       |       |      |
|-----------------|-------|-------|------|
| <i>COA4</i>     | FALSE | FALSE | TRUE |
| <i>COMMD8</i>   | FALSE | FALSE | TRUE |
| <i>COMMD9</i>   | FALSE | FALSE | TRUE |
| <i>COPB1</i>    | FALSE | FALSE | TRUE |
| <i>COPB2</i>    | FALSE | FALSE | TRUE |
| <i>COPS2</i>    | FALSE | FALSE | TRUE |
| <i>COPS3</i>    | FALSE | FALSE | TRUE |
| <i>COPS4</i>    | FALSE | FALSE | TRUE |
| <i>COPS5</i>    | FALSE | FALSE | TRUE |
| <i>COPS7A</i>   | FALSE | FALSE | TRUE |
| <i>COPS8</i>    | FALSE | FALSE | TRUE |
| <i>COQ10B</i>   | FALSE | FALSE | TRUE |
| <i>COQ9</i>     | FALSE | FALSE | TRUE |
| <i>CORO1C</i>   | FALSE | FALSE | TRUE |
| <i>COX17</i>    | FALSE | FALSE | TRUE |
| <i>CPD</i>      | FALSE | FALSE | TRUE |
| <i>CPSF3</i>    | FALSE | FALSE | TRUE |
| <i>CRK</i>      | FALSE | FALSE | TRUE |
| <i>CRKL</i>     | FALSE | FALSE | TRUE |
| <i>CRNKL1</i>   | FALSE | FALSE | TRUE |
| <i>CSK</i>      | FALSE | FALSE | TRUE |
| <i>CSNK1A1</i>  | FALSE | FALSE | TRUE |
| <i>CSNK1G3</i>  | FALSE | FALSE | TRUE |
| <i>CSNK2A1</i>  | FALSE | FALSE | TRUE |
| <i>CSNK2A2</i>  | FALSE | FALSE | TRUE |
| <i>CSRNP2</i>   | FALSE | FALSE | TRUE |
| <i>CSTF1</i>    | FALSE | FALSE | TRUE |
| <i>CSTF3</i>    | FALSE | FALSE | TRUE |
| <i>CTH</i>      | FALSE | FALSE | TRUE |
| <i>CTNS</i>     | FALSE | FALSE | TRUE |
| <i>CTR9</i>     | FALSE | FALSE | TRUE |
| <i>CTSL</i>     | FALSE | FALSE | TRUE |
| <i>CUL2</i>     | FALSE | FALSE | TRUE |
| <i>CUL3</i>     | FALSE | FALSE | TRUE |
| <i>CUL5</i>     | FALSE | FALSE | TRUE |
| <i>CWC15</i>    | FALSE | FALSE | TRUE |
| <i>CWC22</i>    | FALSE | FALSE | TRUE |
| <i>CWC25</i>    | FALSE | FALSE | TRUE |
| <i>CWF19L1</i>  | FALSE | FALSE | TRUE |
| <i>CXorf40B</i> | FALSE | FALSE | TRUE |
| <i>CYB5A</i>    | FALSE | FALSE | TRUE |
| <i>CYB5RL</i>   | FALSE | FALSE | TRUE |
| <i>CYCS</i>     | FALSE | FALSE | TRUE |
| <i>CYP1B1</i>   | FALSE | FALSE | TRUE |

---

---

|                |       |       |      |
|----------------|-------|-------|------|
| <i>DADI</i>    | FALSE | FALSE | TRUE |
| <i>DBT</i>     | FALSE | FALSE | TRUE |
| <i>DCLRE1A</i> | FALSE | FALSE | TRUE |
| <i>DCP1A</i>   | FALSE | FALSE | TRUE |
| <i>DCPS</i>    | FALSE | FALSE | TRUE |
| <i>DCTN4</i>   | FALSE | FALSE | TRUE |
| <i>DCUN1D5</i> | FALSE | FALSE | TRUE |
| <i>DDB1</i>    | FALSE | FALSE | TRUE |
| <i>DDHD1</i>   | FALSE | FALSE | TRUE |
| <i>DDX19A</i>  | FALSE | FALSE | TRUE |
| <i>DDX20</i>   | FALSE | FALSE | TRUE |
| <i>DDX23</i>   | FALSE | FALSE | TRUE |
| <i>DDX24</i>   | FALSE | FALSE | TRUE |
| <i>DDX27</i>   | FALSE | FALSE | TRUE |
| <i>DDX3X</i>   | FALSE | FALSE | TRUE |
| <i>DDX47</i>   | FALSE | FALSE | TRUE |
| <i>DDX52</i>   | FALSE | FALSE | TRUE |
| <i>DDX56</i>   | FALSE | FALSE | TRUE |
| <i>DENR</i>    | FALSE | FALSE | TRUE |
| <i>DERL1</i>   | FALSE | FALSE | TRUE |
| <i>DERL2</i>   | FALSE | FALSE | TRUE |
| <i>DES11</i>   | FALSE | FALSE | TRUE |
| <i>DGAT2</i>   | FALSE | FALSE | TRUE |
| <i>DGCR8</i>   | FALSE | FALSE | TRUE |
| <i>DHCR7</i>   | FALSE | FALSE | TRUE |
| <i>DHODH</i>   | FALSE | FALSE | TRUE |
| <i>DHX15</i>   | FALSE | FALSE | TRUE |
| <i>DHX29</i>   | FALSE | FALSE | TRUE |
| <i>DHX36</i>   | FALSE | FALSE | TRUE |
| <i>DHX38</i>   | FALSE | FALSE | TRUE |
| <i>DHX57</i>   | FALSE | FALSE | TRUE |
| <i>DIABLO</i>  | FALSE | FALSE | TRUE |
| <i>DIS3</i>    | FALSE | FALSE | TRUE |
| <i>DLD</i>     | FALSE | FALSE | TRUE |
| <i>DNAJA1</i>  | FALSE | FALSE | TRUE |
| <i>DNAJA4</i>  | FALSE | FALSE | TRUE |
| <i>DNAJB11</i> | FALSE | FALSE | TRUE |
| <i>DNAJB12</i> | FALSE | FALSE | TRUE |
| <i>DNAJB5</i>  | FALSE | FALSE | TRUE |
| <i>DNAJB6</i>  | FALSE | FALSE | TRUE |
| <i>DNAJC14</i> | FALSE | FALSE | TRUE |
| <i>DNAJC2</i>  | FALSE | FALSE | TRUE |
| <i>DNAJC24</i> | FALSE | FALSE | TRUE |
| <i>DNAJC7</i>  | FALSE | FALSE | TRUE |

---



---

|                |       |       |      |
|----------------|-------|-------|------|
| <i>DNAJC8</i>  | FALSE | FALSE | TRUE |
| <i>DNAJC9</i>  | FALSE | FALSE | TRUE |
| <i>DNAL1</i>   | FALSE | FALSE | TRUE |
| <i>DNAL4</i>   | FALSE | FALSE | TRUE |
| <i>DNM1L</i>   | FALSE | FALSE | TRUE |
| <i>DNTTIP1</i> | FALSE | FALSE | TRUE |
| <i>DNTTIP2</i> | FALSE | FALSE | TRUE |
| <i>DONSON</i>  | FALSE | FALSE | TRUE |
| <i>DPH3</i>    | FALSE | FALSE | TRUE |
| <i>DPM2</i>    | FALSE | FALSE | TRUE |
| <i>DPY30</i>   | FALSE | FALSE | TRUE |
| <i>DR1</i>     | FALSE | FALSE | TRUE |
| <i>DRG2</i>    | FALSE | FALSE | TRUE |
| <i>DSCC1</i>   | FALSE | FALSE | TRUE |
| <i>DTWD1</i>   | FALSE | FALSE | TRUE |
| <i>DUSP11</i>  | FALSE | FALSE | TRUE |
| <i>DUSP14</i>  | FALSE | FALSE | TRUE |
| <i>DUSP3</i>   | FALSE | FALSE | TRUE |
| <i>DYNC112</i> | FALSE | FALSE | TRUE |
| <i>DYNLL2</i>  | FALSE | FALSE | TRUE |
| <i>E2F1</i>    | FALSE | FALSE | TRUE |
| <i>E2F3</i>    | FALSE | FALSE | TRUE |
| <i>E2F6</i>    | FALSE | FALSE | TRUE |
| <i>EAF1</i>    | FALSE | FALSE | TRUE |
| <i>EAF2</i>    | FALSE | FALSE | TRUE |
| <i>EARS2</i>   | FALSE | FALSE | TRUE |
| <i>EBAG9</i>   | FALSE | FALSE | TRUE |
| <i>ECD</i>     | FALSE | FALSE | TRUE |
| <i>EFNB1</i>   | FALSE | FALSE | TRUE |
| <i>EFTUD2</i>  | FALSE | FALSE | TRUE |
| <i>EHD4</i>    | FALSE | FALSE | TRUE |
| <i>EI24</i>    | FALSE | FALSE | TRUE |
| <i>EIF1AX</i>  | FALSE | FALSE | TRUE |
| <i>EIF1AY</i>  | FALSE | FALSE | TRUE |
| <i>EIF2S2</i>  | FALSE | FALSE | TRUE |
| <i>EIF3A</i>   | FALSE | FALSE | TRUE |
| <i>EIF3J</i>   | FALSE | FALSE | TRUE |
| <i>EIF3M</i>   | FALSE | FALSE | TRUE |
| <i>EIF4A3</i>  | FALSE | FALSE | TRUE |
| <i>EIF4E</i>   | FALSE | FALSE | TRUE |
| <i>EIF4G2</i>  | FALSE | FALSE | TRUE |
| <i>EIF4H</i>   | FALSE | FALSE | TRUE |
| <i>EIF5</i>    | FALSE | FALSE | TRUE |
| <i>EIF5B</i>   | FALSE | FALSE | TRUE |

---

---

|                |       |       |      |
|----------------|-------|-------|------|
| <i>EIF6</i>    | FALSE | FALSE | TRUE |
| <i>ELL</i>     | FALSE | FALSE | TRUE |
| <i>ELL2</i>    | FALSE | FALSE | TRUE |
| <i>ELOF1</i>   | FALSE | FALSE | TRUE |
| <i>ELOVL5</i>  | FALSE | FALSE | TRUE |
| <i>ELP3</i>    | FALSE | FALSE | TRUE |
| <i>EMC3</i>    | FALSE | FALSE | TRUE |
| <i>EMC4</i>    | FALSE | FALSE | TRUE |
| <i>EMC7</i>    | FALSE | FALSE | TRUE |
| <i>EMC8</i>    | FALSE | FALSE | TRUE |
| <i>EMG1</i>    | FALSE | FALSE | TRUE |
| <i>EMP1</i>    | FALSE | FALSE | TRUE |
| <i>ENDOG</i>   | FALSE | FALSE | TRUE |
| <i>ENKD1</i>   | FALSE | FALSE | TRUE |
| <i>ENPP4</i>   | FALSE | FALSE | TRUE |
| <i>EPDR1</i>   | FALSE | FALSE | TRUE |
| <i>ERCC8</i>   | FALSE | FALSE | TRUE |
| <i>ERF</i>     | FALSE | FALSE | TRUE |
| <i>ERGIC2</i>  | FALSE | FALSE | TRUE |
| <i>ERH</i>     | FALSE | FALSE | TRUE |
| <i>ERII</i>    | FALSE | FALSE | TRUE |
| <i>ERI2</i>    | FALSE | FALSE | TRUE |
| <i>ESCO2</i>   | FALSE | FALSE | TRUE |
| <i>ESD</i>     | FALSE | FALSE | TRUE |
| <i>ETF1</i>    | FALSE | FALSE | TRUE |
| <i>EWSR1</i>   | FALSE | FALSE | TRUE |
| <i>EXOC5</i>   | FALSE | FALSE | TRUE |
| <i>EXOSC10</i> | FALSE | FALSE | TRUE |
| <i>EXOSC3</i>  | FALSE | FALSE | TRUE |
| <i>EXOSC4</i>  | FALSE | FALSE | TRUE |
| <i>EXOSC5</i>  | FALSE | FALSE | TRUE |
| <i>EXOSC9</i>  | FALSE | FALSE | TRUE |
| <i>EXTL2</i>   | FALSE | FALSE | TRUE |
| <i>EYA3</i>    | FALSE | FALSE | TRUE |
| <i>FADD</i>    | FALSE | FALSE | TRUE |
| <i>FAF1</i>    | FALSE | FALSE | TRUE |
| <i>FAIM</i>    | FALSE | FALSE | TRUE |
| <i>FAM126A</i> | FALSE | FALSE | TRUE |
| <i>FAM184A</i> | FALSE | FALSE | TRUE |
| <i>FAM207A</i> | FALSE | FALSE | TRUE |
| <i>FAM210A</i> | FALSE | FALSE | TRUE |
| <i>FAM219A</i> | FALSE | FALSE | TRUE |
| <i>FAM35A</i>  | FALSE | FALSE | TRUE |
| <i>FAM3C</i>   | FALSE | FALSE | TRUE |

---

---

|                   |       |       |      |
|-------------------|-------|-------|------|
| <i>FAM49B</i>     | FALSE | FALSE | TRUE |
| <i>FAM53C</i>     | FALSE | FALSE | TRUE |
| <i>FAM57A</i>     | FALSE | FALSE | TRUE |
| <i>FAM58A</i>     | FALSE | FALSE | TRUE |
| <i>FAM86C2P</i>   | FALSE | FALSE | TRUE |
| <i>FAM86EP</i>    | FALSE | FALSE | TRUE |
| <i>FAM89A</i>     | FALSE | FALSE | TRUE |
| <i>FAM91A1</i>    | FALSE | FALSE | TRUE |
| <i>FAM98B</i>     | FALSE | FALSE | TRUE |
| <i>FANCB</i>      | FALSE | FALSE | TRUE |
| <i>FANCL</i>      | FALSE | FALSE | TRUE |
| <i>FASN</i>       | FALSE | FALSE | TRUE |
| <i>FBXL18</i>     | FALSE | FALSE | TRUE |
| <i>FBXO22</i>     | FALSE | FALSE | TRUE |
| <i>FBXO28</i>     | FALSE | FALSE | TRUE |
| <i>FBXO4</i>      | FALSE | FALSE | TRUE |
| <i>FBXO8</i>      | FALSE | FALSE | TRUE |
| <i>FBXW11</i>     | FALSE | FALSE | TRUE |
| <i>FCF1</i>       | FALSE | FALSE | TRUE |
| <i>FDX1</i>       | FALSE | FALSE | TRUE |
| <i>FDXACB1</i>    | FALSE | FALSE | TRUE |
| <i>FER</i>        | FALSE | FALSE | TRUE |
| <i>FGFR1OP</i>    | FALSE | FALSE | TRUE |
| <i>FHL3</i>       | FALSE | FALSE | TRUE |
| <i>FIGNL1</i>     | FALSE | FALSE | TRUE |
| <i>FIP1L1</i>     | FALSE | FALSE | TRUE |
| <i>FIZ1</i>       | FALSE | FALSE | TRUE |
| <i>FOXP4</i>      | FALSE | FALSE | TRUE |
| <i>FRG1</i>       | FALSE | FALSE | TRUE |
| <i>FSCN1</i>      | FALSE | FALSE | TRUE |
| <i>FSTL3</i>      | FALSE | FALSE | TRUE |
| <i>FUBP1</i>      | FALSE | FALSE | TRUE |
| <i>FUNDC2</i>     | FALSE | FALSE | TRUE |
| <i>FXN</i>        | FALSE | FALSE | TRUE |
| <i>G3BP2</i>      | FALSE | FALSE | TRUE |
| <i>G6PC3</i>      | FALSE | FALSE | TRUE |
| <i>GADD45GIP1</i> | FALSE | FALSE | TRUE |
| <i>GALK2</i>      | FALSE | FALSE | TRUE |
| <i>GALNT1</i>     | FALSE | FALSE | TRUE |
| <i>GALNT7</i>     | FALSE | FALSE | TRUE |
| <i>GAN</i>        | FALSE | FALSE | TRUE |
| <i>GAPVD1</i>     | FALSE | FALSE | TRUE |
| <i>GATC</i>       | FALSE | FALSE | TRUE |
| <i>GBAS</i>       | FALSE | FALSE | TRUE |

---

---

|                 |       |       |      |
|-----------------|-------|-------|------|
| <i>GBF1</i>     | FALSE | FALSE | TRUE |
| <i>GCA</i>      | FALSE | FALSE | TRUE |
| <i>GCAT</i>     | FALSE | FALSE | TRUE |
| <i>GCH1</i>     | FALSE | FALSE | TRUE |
| <i>GCLC</i>     | FALSE | FALSE | TRUE |
| <i>GCLM</i>     | FALSE | FALSE | TRUE |
| <i>GDAP2</i>    | FALSE | FALSE | TRUE |
| <i>GEMIN7</i>   | FALSE | FALSE | TRUE |
| <i>GEMIN8</i>   | FALSE | FALSE | TRUE |
| <i>GEN1</i>     | FALSE | FALSE | TRUE |
| <i>GFER</i>     | FALSE | FALSE | TRUE |
| <i>GFOD2</i>    | FALSE | FALSE | TRUE |
| <i>GFPT1</i>    | FALSE | FALSE | TRUE |
| <i>GID4</i>     | FALSE | FALSE | TRUE |
| <i>GINS1</i>    | FALSE | FALSE | TRUE |
| <i>GK</i>       | FALSE | FALSE | TRUE |
| <i>GLUD1</i>    | FALSE | FALSE | TRUE |
| <i>GMEB1</i>    | FALSE | FALSE | TRUE |
| <i>GMPPB</i>    | FALSE | FALSE | TRUE |
| <i>GNAI3</i>    | FALSE | FALSE | TRUE |
| <i>GNL3</i>     | FALSE | FALSE | TRUE |
| <i>GNL3L</i>    | FALSE | FALSE | TRUE |
| <i>GNPDA2</i>   | FALSE | FALSE | TRUE |
| <i>GOLM1</i>    | FALSE | FALSE | TRUE |
| <i>GOLPH3</i>   | FALSE | FALSE | TRUE |
| <i>GOLT1B</i>   | FALSE | FALSE | TRUE |
| <i>GORASP2</i>  | FALSE | FALSE | TRUE |
| <i>GOSR1</i>    | FALSE | FALSE | TRUE |
| <i>GOSR2</i>    | FALSE | FALSE | TRUE |
| <i>GPATCH11</i> | FALSE | FALSE | TRUE |
| <i>GPATCH3</i>  | FALSE | FALSE | TRUE |
| <i>GPC1</i>     | FALSE | FALSE | TRUE |
| <i>GPD2</i>     | FALSE | FALSE | TRUE |
| <i>GPN1</i>     | FALSE | FALSE | TRUE |
| <i>GPN2</i>     | FALSE | FALSE | TRUE |
| <i>GPR180</i>   | FALSE | FALSE | TRUE |
| <i>GPR68</i>    | FALSE | FALSE | TRUE |
| <i>GPT2</i>     | FALSE | FALSE | TRUE |
| <i>GRPEL1</i>   | FALSE | FALSE | TRUE |
| <i>GSK3A</i>    | FALSE | FALSE | TRUE |
| <i>GSKIP</i>    | FALSE | FALSE | TRUE |
| <i>GSTA4</i>    | FALSE | FALSE | TRUE |
| <i>GSTO1</i>    | FALSE | FALSE | TRUE |
| <i>GTF2A2</i>   | FALSE | FALSE | TRUE |

---

---

|                 |       |       |      |
|-----------------|-------|-------|------|
| <i>GTF2B</i>    | FALSE | FALSE | TRUE |
| <i>GTF2E1</i>   | FALSE | FALSE | TRUE |
| <i>GTF3C1</i>   | FALSE | FALSE | TRUE |
| <i>GTF3C4</i>   | FALSE | FALSE | TRUE |
| <i>GTF3C5</i>   | FALSE | FALSE | TRUE |
| <i>GTPBP10</i>  | FALSE | FALSE | TRUE |
| <i>GTPBP8</i>   | FALSE | FALSE | TRUE |
| <i>GUF1</i>     | FALSE | FALSE | TRUE |
| <i>GZF1</i>     | FALSE | FALSE | TRUE |
| <i>HACL1</i>    | FALSE | FALSE | TRUE |
| <i>HADH</i>     | FALSE | FALSE | TRUE |
| <i>HAT1</i>     | FALSE | FALSE | TRUE |
| <i>HAUS2</i>    | FALSE | FALSE | TRUE |
| <i>HBS1L</i>    | FALSE | FALSE | TRUE |
| <i>HDAC2</i>    | FALSE | FALSE | TRUE |
| <i>HDCC2</i>    | FALSE | FALSE | TRUE |
| <i>HEATR2</i>   | FALSE | FALSE | TRUE |
| <i>HEATR3</i>   | FALSE | FALSE | TRUE |
| <i>HERPUDI</i>  | FALSE | FALSE | TRUE |
| <i>HEXIM2</i>   | FALSE | FALSE | TRUE |
| <i>HIAT1</i>    | FALSE | FALSE | TRUE |
| <i>HIC1</i>     | FALSE | FALSE | TRUE |
| <i>HIF1A</i>    | FALSE | FALSE | TRUE |
| <i>HIGD1A</i>   | FALSE | FALSE | TRUE |
| <i>HM13</i>     | FALSE | FALSE | TRUE |
| <i>HMBS</i>     | FALSE | FALSE | TRUE |
| <i>HMCE5</i>    | FALSE | FALSE | TRUE |
| <i>HMGB3</i>    | FALSE | FALSE | TRUE |
| <i>HNI</i>      | FALSE | FALSE | TRUE |
| <i>HNRNPLL</i>  | FALSE | FALSE | TRUE |
| <i>HNRNPM</i>   | FALSE | FALSE | TRUE |
| <i>HNRNPU</i>   | FALSE | FALSE | TRUE |
| <i>HOMEZ</i>    | FALSE | FALSE | TRUE |
| <i>HPS5</i>     | FALSE | FALSE | TRUE |
| <i>HS2ST1</i>   | FALSE | FALSE | TRUE |
| <i>HS6ST1</i>   | FALSE | FALSE | TRUE |
| <i>HSD17B12</i> | FALSE | FALSE | TRUE |
| <i>HSF2</i>     | FALSE | FALSE | TRUE |
| <i>HSP90AA1</i> | FALSE | FALSE | TRUE |
| <i>HSP90AB1</i> | FALSE | FALSE | TRUE |
| <i>HSP90B1</i>  | FALSE | FALSE | TRUE |
| <i>HSPA13</i>   | FALSE | FALSE | TRUE |
| <i>HSPA14</i>   | FALSE | FALSE | TRUE |
| <i>HSPA4</i>    | FALSE | FALSE | TRUE |

---

---

|                |       |       |      |
|----------------|-------|-------|------|
| <i>HSPA5</i>   | FALSE | FALSE | TRUE |
| <i>HSPA8</i>   | FALSE | FALSE | TRUE |
| <i>HSPH1</i>   | FALSE | FALSE | TRUE |
| <i>HTRA2</i>   | FALSE | FALSE | TRUE |
| <i>HYAL2</i>   | FALSE | FALSE | TRUE |
| <i>HYAL3</i>   | FALSE | FALSE | TRUE |
| <i>HYOU1</i>   | FALSE | FALSE | TRUE |
| <i>IDH3A</i>   | FALSE | FALSE | TRUE |
| <i>IDH3B</i>   | FALSE | FALSE | TRUE |
| <i>ID11</i>    | FALSE | FALSE | TRUE |
| <i>IER3IP1</i> | FALSE | FALSE | TRUE |
| <i>IFNAR1</i>  | FALSE | FALSE | TRUE |
| <i>IFNLR1</i>  | FALSE | FALSE | TRUE |
| <i>IFRD1</i>   | FALSE | FALSE | TRUE |
| <i>IFT43</i>   | FALSE | FALSE | TRUE |
| <i>IFT46</i>   | FALSE | FALSE | TRUE |
| <i>IFT57</i>   | FALSE | FALSE | TRUE |
| <i>IKBIP</i>   | FALSE | FALSE | TRUE |
| <i>IL2</i>     | FALSE | FALSE | TRUE |
| <i>IL23A</i>   | FALSE | FALSE | TRUE |
| <i>IL23R</i>   | FALSE | FALSE | TRUE |
| <i>IL27RA</i>  | FALSE | FALSE | TRUE |
| <i>ILF3</i>    | FALSE | FALSE | TRUE |
| <i>IMMP2L</i>  | FALSE | FALSE | TRUE |
| <i>IMMT</i>    | FALSE | FALSE | TRUE |
| <i>IMPA1</i>   | FALSE | FALSE | TRUE |
| <i>INCENP</i>  | FALSE | FALSE | TRUE |
| <i>ING5</i>    | FALSE | FALSE | TRUE |
| <i>INIP</i>    | FALSE | FALSE | TRUE |
| <i>INO80C</i>  | FALSE | FALSE | TRUE |
| <i>INTS9</i>   | FALSE | FALSE | TRUE |
| <i>IP6K1</i>   | FALSE | FALSE | TRUE |
| <i>IP6K2</i>   | FALSE | FALSE | TRUE |
| <i>IPO7</i>    | FALSE | FALSE | TRUE |
| <i>IPP</i>     | FALSE | FALSE | TRUE |
| <i>IQCB1</i>   | FALSE | FALSE | TRUE |
| <i>IRGQ</i>    | FALSE | FALSE | TRUE |
| <i>ISOC1</i>   | FALSE | FALSE | TRUE |
| <i>ITSN1</i>   | FALSE | FALSE | TRUE |
| <i>IWS1</i>    | FALSE | FALSE | TRUE |
| <i>JAM3</i>    | FALSE | FALSE | TRUE |
| <i>JKAMP</i>   | FALSE | FALSE | TRUE |
| <i>JMJD6</i>   | FALSE | FALSE | TRUE |
| <i>KARS</i>    | FALSE | FALSE | TRUE |

---

---

|                 |       |       |      |
|-----------------|-------|-------|------|
| <i>KAT5</i>     | FALSE | FALSE | TRUE |
| <i>KATNA1</i>   | FALSE | FALSE | TRUE |
| <i>KATNBL1</i>  | FALSE | FALSE | TRUE |
| <i>KCNK1</i>    | FALSE | FALSE | TRUE |
| <i>KCNQ5</i>    | FALSE | FALSE | TRUE |
| <i>KCTD10</i>   | FALSE | FALSE | TRUE |
| <i>KDELC1</i>   | FALSE | FALSE | TRUE |
| <i>KDELR2</i>   | FALSE | FALSE | TRUE |
| <i>KHDRBS1</i>  | FALSE | FALSE | TRUE |
| <i>KHK</i>      | FALSE | FALSE | TRUE |
| <i>KIAA0513</i> | FALSE | FALSE | TRUE |
| <i>KIAA0930</i> | FALSE | FALSE | TRUE |
| <i>KIAA0947</i> | FALSE | FALSE | TRUE |
| <i>KIAA1143</i> | FALSE | FALSE | TRUE |
| <i>KIAA1429</i> | FALSE | FALSE | TRUE |
| <i>KIAA1467</i> | FALSE | FALSE | TRUE |
| <i>KIAA1671</i> | FALSE | FALSE | TRUE |
| <i>KIF18A</i>   | FALSE | FALSE | TRUE |
| <i>KIF20B</i>   | FALSE | FALSE | TRUE |
| <i>KIF5B</i>    | FALSE | FALSE | TRUE |
| <i>KIN</i>      | FALSE | FALSE | TRUE |
| <i>KLC2</i>     | FALSE | FALSE | TRUE |
| <i>KLF5</i>     | FALSE | FALSE | TRUE |
| <i>KLHL18</i>   | FALSE | FALSE | TRUE |
| <i>KLHL25</i>   | FALSE | FALSE | TRUE |
| <i>KPNA2</i>    | FALSE | FALSE | TRUE |
| <i>KPNA3</i>    | FALSE | FALSE | TRUE |
| <i>KPNA4</i>    | FALSE | FALSE | TRUE |
| <i>KRT18</i>    | FALSE | FALSE | TRUE |
| <i>KSRI</i>     | FALSE | FALSE | TRUE |
| <i>KTNI</i>     | FALSE | FALSE | TRUE |
| <i>L2HGDH</i>   | FALSE | FALSE | TRUE |
| <i>LACTB2</i>   | FALSE | FALSE | TRUE |
| <i>LAMTOR3</i>  | FALSE | FALSE | TRUE |
| <i>LAMTOR5</i>  | FALSE | FALSE | TRUE |
| <i>LAP3</i>     | FALSE | FALSE | TRUE |
| <i>LARP4B</i>   | FALSE | FALSE | TRUE |
| <i>LARP7</i>    | FALSE | FALSE | TRUE |
| <i>LBR</i>      | FALSE | FALSE | TRUE |
| <i>LCLAT1</i>   | FALSE | FALSE | TRUE |
| <i>LCPI</i>     | FALSE | FALSE | TRUE |
| <i>LDHA</i>     | FALSE | FALSE | TRUE |
| <i>LEO1</i>     | FALSE | FALSE | TRUE |
| <i>LIF</i>      | FALSE | FALSE | TRUE |

---

---

|                     |       |       |      |
|---------------------|-------|-------|------|
| <i>LIN52</i>        | FALSE | FALSE | TRUE |
| <i>LIN7C</i>        | FALSE | FALSE | TRUE |
| <i>LINC00152</i>    | FALSE | FALSE | TRUE |
| <i>LINC00998</i>    | FALSE | FALSE | TRUE |
| <i>LMAN2L</i>       | FALSE | FALSE | TRUE |
| <i>LMBR1</i>        | FALSE | FALSE | TRUE |
| <i>LOC100288842</i> | FALSE | FALSE | TRUE |
| <i>LOC100505812</i> | FALSE | FALSE | TRUE |
| <i>LOC339803</i>    | FALSE | FALSE | TRUE |
| <i>LOH12CR1</i>     | FALSE | FALSE | TRUE |
| <i>LPCAT3</i>       | FALSE | FALSE | TRUE |
| <i>LPXN</i>         | FALSE | FALSE | TRUE |
| <i>LRCH1</i>        | FALSE | FALSE | TRUE |
| <i>LRP11</i>        | FALSE | FALSE | TRUE |
| <i>LRPAP1</i>       | FALSE | FALSE | TRUE |
| <i>LRRC20</i>       | FALSE | FALSE | TRUE |
| <i>LRRC40</i>       | FALSE | FALSE | TRUE |
| <i>LRRC41</i>       | FALSE | FALSE | TRUE |
| <i>LRRC58</i>       | FALSE | FALSE | TRUE |
| <i>LRRC61</i>       | FALSE | FALSE | TRUE |
| <i>LRRC8C</i>       | FALSE | FALSE | TRUE |
| <i>LRRFIP1</i>      | FALSE | FALSE | TRUE |
| <i>LRTOMT</i>       | FALSE | FALSE | TRUE |
| <i>LRWD1</i>        | FALSE | FALSE | TRUE |
| <i>LSM1</i>         | FALSE | FALSE | TRUE |
| <i>LSM3</i>         | FALSE | FALSE | TRUE |
| <i>LSM4</i>         | FALSE | FALSE | TRUE |
| <i>LSM5</i>         | FALSE | FALSE | TRUE |
| <i>LSM6</i>         | FALSE | FALSE | TRUE |
| <i>LYAR</i>         | FALSE | FALSE | TRUE |
| <i>LYPLA1</i>       | FALSE | FALSE | TRUE |
| <i>MAFG</i>         | FALSE | FALSE | TRUE |
| <i>MAGOH</i>        | FALSE | FALSE | TRUE |
| <i>MAGOHB</i>       | FALSE | FALSE | TRUE |
| <i>MALSUI</i>       | FALSE | FALSE | TRUE |
| <i>MAMLD1</i>       | FALSE | FALSE | TRUE |
| <i>MANBAL</i>       | FALSE | FALSE | TRUE |
| <i>MAPK1</i>        | FALSE | FALSE | TRUE |
| <i>MAPK1IP1L</i>    | FALSE | FALSE | TRUE |
| <i>MAPK9</i>        | FALSE | FALSE | TRUE |
| <i>MAPKAPK5</i>     | FALSE | FALSE | TRUE |
| <i>MAPRE1</i>       | FALSE | FALSE | TRUE |
| <i>5-Mar</i>        | FALSE | FALSE | TRUE |
| <i>MARS</i>         | FALSE | FALSE | TRUE |

---



---

|                |       |       |      |
|----------------|-------|-------|------|
| <i>MB21D1</i>  | FALSE | FALSE | TRUE |
| <i>MBD3</i>    | FALSE | FALSE | TRUE |
| <i>MBD4</i>    | FALSE | FALSE | TRUE |
| <i>MCCC2</i>   | FALSE | FALSE | TRUE |
| <i>MCFD2</i>   | FALSE | FALSE | TRUE |
| <i>MCM8</i>    | FALSE | FALSE | TRUE |
| <i>MCRS1</i>   | FALSE | FALSE | TRUE |
| <i>MCUR1</i>   | FALSE | FALSE | TRUE |
| <i>MDFIC</i>   | FALSE | FALSE | TRUE |
| <i>MECR</i>    | FALSE | FALSE | TRUE |
| <i>MED1</i>    | FALSE | FALSE | TRUE |
| <i>MED14</i>   | FALSE | FALSE | TRUE |
| <i>MED19</i>   | FALSE | FALSE | TRUE |
| <i>MED27</i>   | FALSE | FALSE | TRUE |
| <i>MED30</i>   | FALSE | FALSE | TRUE |
| <i>MED7</i>    | FALSE | FALSE | TRUE |
| <i>MESDC2</i>  | FALSE | FALSE | TRUE |
| <i>METAP2</i>  | FALSE | FALSE | TRUE |
| <i>METRNL</i>  | FALSE | FALSE | TRUE |
| <i>METTL1</i>  | FALSE | FALSE | TRUE |
| <i>METTL14</i> | FALSE | FALSE | TRUE |
| <i>METTL16</i> | FALSE | FALSE | TRUE |
| <i>METTL2A</i> | FALSE | FALSE | TRUE |
| <i>METTL6</i>  | FALSE | FALSE | TRUE |
| <i>MEX3D</i>   | FALSE | FALSE | TRUE |
| <i>MFAP3</i>   | FALSE | FALSE | TRUE |
| <i>MFN1</i>    | FALSE | FALSE | TRUE |
| <i>MFSD12</i>  | FALSE | FALSE | TRUE |
| <i>MFSD5</i>   | FALSE | FALSE | TRUE |
| <i>MFSD6</i>   | FALSE | FALSE | TRUE |
| <i>MGME1</i>   | FALSE | FALSE | TRUE |
| <i>MIEF1</i>   | FALSE | FALSE | TRUE |
| <i>MIEN1</i>   | FALSE | FALSE | TRUE |
| <i>MIER3</i>   | FALSE | FALSE | TRUE |
| <i>MINPP1</i>  | FALSE | FALSE | TRUE |
| <i>MITD1</i>   | FALSE | FALSE | TRUE |
| <i>MKKS</i>    | FALSE | FALSE | TRUE |
| <i>MKRN2</i>   | FALSE | FALSE | TRUE |
| <i>MLEC</i>    | FALSE | FALSE | TRUE |
| <i>MLLT1</i>   | FALSE | FALSE | TRUE |
| <i>MMGT1</i>   | FALSE | FALSE | TRUE |
| <i>MND1</i>    | FALSE | FALSE | TRUE |
| <i>MOB1A</i>   | FALSE | FALSE | TRUE |
| <i>MOB3A</i>   | FALSE | FALSE | TRUE |

---

---

|                  |       |       |      |
|------------------|-------|-------|------|
| <i>MOGS</i>      | FALSE | FALSE | TRUE |
| <i>MON1A</i>     | FALSE | FALSE | TRUE |
| <i>MORN2</i>     | FALSE | FALSE | TRUE |
| <i>MORN4</i>     | FALSE | FALSE | TRUE |
| <i>MOSPD1</i>    | FALSE | FALSE | TRUE |
| <i>MPHOSPH10</i> | FALSE | FALSE | TRUE |
| <i>MPHOSPH6</i>  | FALSE | FALSE | TRUE |
| <i>MPLKIP</i>    | FALSE | FALSE | TRUE |
| <i>MRPL1</i>     | FALSE | FALSE | TRUE |
| <i>MRPL13</i>    | FALSE | FALSE | TRUE |
| <i>MRPL14</i>    | FALSE | FALSE | TRUE |
| <i>MRPL17</i>    | FALSE | FALSE | TRUE |
| <i>MRPL18</i>    | FALSE | FALSE | TRUE |
| <i>MRPL19</i>    | FALSE | FALSE | TRUE |
| <i>MRPL42</i>    | FALSE | FALSE | TRUE |
| <i>MRPL46</i>    | FALSE | FALSE | TRUE |
| <i>MRPL47</i>    | FALSE | FALSE | TRUE |
| <i>MRPL50</i>    | FALSE | FALSE | TRUE |
| <i>MRPL57</i>    | FALSE | FALSE | TRUE |
| <i>MRPS10</i>    | FALSE | FALSE | TRUE |
| <i>MRPS12</i>    | FALSE | FALSE | TRUE |
| <i>MRPS18A</i>   | FALSE | FALSE | TRUE |
| <i>MRPS22</i>    | FALSE | FALSE | TRUE |
| <i>MRPS26</i>    | FALSE | FALSE | TRUE |
| <i>MRPS27</i>    | FALSE | FALSE | TRUE |
| <i>MRPS28</i>    | FALSE | FALSE | TRUE |
| <i>MRPS33</i>    | FALSE | FALSE | TRUE |
| <i>MRPS35</i>    | FALSE | FALSE | TRUE |
| <i>MRPS6</i>     | FALSE | FALSE | TRUE |
| <i>MRPS7</i>     | FALSE | FALSE | TRUE |
| <i>MSANTD2</i>   | FALSE | FALSE | TRUE |
| <i>MSC</i>       | FALSE | FALSE | TRUE |
| <i>MSRB1</i>     | FALSE | FALSE | TRUE |
| <i>MT1X</i>      | FALSE | FALSE | TRUE |
| <i>MTAP</i>      | FALSE | FALSE | TRUE |
| <i>MTDH</i>      | FALSE | FALSE | TRUE |
| <i>MTERF</i>     | FALSE | FALSE | TRUE |
| <i>MTERFD2</i>   | FALSE | FALSE | TRUE |
| <i>MTF1</i>      | FALSE | FALSE | TRUE |
| <i>MTFMT</i>     | FALSE | FALSE | TRUE |
| <i>MTFP1</i>     | FALSE | FALSE | TRUE |
| <i>MTG2</i>      | FALSE | FALSE | TRUE |
| <i>MTRF1L</i>    | FALSE | FALSE | TRUE |
| <i>MTX2</i>      | FALSE | FALSE | TRUE |

---

---

|                |       |       |      |
|----------------|-------|-------|------|
| <i>MUT</i>     | FALSE | FALSE | TRUE |
| <i>MVK</i>     | FALSE | FALSE | TRUE |
| <i>MYL6B</i>   | FALSE | FALSE | TRUE |
| <i>MYNN</i>    | FALSE | FALSE | TRUE |
| <i>MYOF</i>    | FALSE | FALSE | TRUE |
| <i>MZT1</i>    | FALSE | FALSE | TRUE |
| <i>N4BP3</i>   | FALSE | FALSE | TRUE |
| <i>NAA35</i>   | FALSE | FALSE | TRUE |
| <i>NAA50</i>   | FALSE | FALSE | TRUE |
| <i>NABP1</i>   | FALSE | FALSE | TRUE |
| <i>NACCI</i>   | FALSE | FALSE | TRUE |
| <i>NADK</i>    | FALSE | FALSE | TRUE |
| <i>NAE1</i>    | FALSE | FALSE | TRUE |
| <i>NAF1</i>    | FALSE | FALSE | TRUE |
| <i>NANS</i>    | FALSE | FALSE | TRUE |
| <i>NAP1L4</i>  | FALSE | FALSE | TRUE |
| <i>NAPEPLD</i> | FALSE | FALSE | TRUE |
| <i>NAPG</i>    | FALSE | FALSE | TRUE |
| <i>NARS</i>    | FALSE | FALSE | TRUE |
| <i>NASP</i>    | FALSE | FALSE | TRUE |
| <i>NCAPH</i>   | FALSE | FALSE | TRUE |
| <i>NCBP1</i>   | FALSE | FALSE | TRUE |
| <i>NCEH1</i>   | FALSE | FALSE | TRUE |
| <i>NCOA2</i>   | FALSE | FALSE | TRUE |
| <i>NCOA3</i>   | FALSE | FALSE | TRUE |
| <i>NCOA5</i>   | FALSE | FALSE | TRUE |
| <i>NDC1</i>    | FALSE | FALSE | TRUE |
| <i>NDFIP2</i>  | FALSE | FALSE | TRUE |
| <i>NDUFA6</i>  | FALSE | FALSE | TRUE |
| <i>NDUFA8</i>  | FALSE | FALSE | TRUE |
| <i>NDUFA9</i>  | FALSE | FALSE | TRUE |
| <i>NDUFAB1</i> | FALSE | FALSE | TRUE |
| <i>NDUFAF1</i> | FALSE | FALSE | TRUE |
| <i>NDUFAF3</i> | FALSE | FALSE | TRUE |
| <i>NDUFAF4</i> | FALSE | FALSE | TRUE |
| <i>NDUFAF5</i> | FALSE | FALSE | TRUE |
| <i>NDUFC1</i>  | FALSE | FALSE | TRUE |
| <i>NDUFS3</i>  | FALSE | FALSE | TRUE |
| <i>NEDD4</i>   | FALSE | FALSE | TRUE |
| <i>NEK4</i>    | FALSE | FALSE | TRUE |
| <i>NELFA</i>   | FALSE | FALSE | TRUE |
| <i>NETO2</i>   | FALSE | FALSE | TRUE |
| <i>NFE2L2</i>  | FALSE | FALSE | TRUE |
| <i>NFE2L3</i>  | FALSE | FALSE | TRUE |

---

---

|                |       |       |      |
|----------------|-------|-------|------|
| <i>NFIX</i>    | FALSE | FALSE | TRUE |
| <i>NFKB1</i>   | FALSE | FALSE | TRUE |
| <i>NFKBIE</i>  | FALSE | FALSE | TRUE |
| <i>NGLY1</i>   | FALSE | FALSE | TRUE |
| <i>NGRN</i>    | FALSE | FALSE | TRUE |
| <i>NHP2L1</i>  | FALSE | FALSE | TRUE |
| <i>NINJ1</i>   | FALSE | FALSE | TRUE |
| <i>NIPA2</i>   | FALSE | FALSE | TRUE |
| <i>NIPAL4</i>  | FALSE | FALSE | TRUE |
| <i>NKIRAS1</i> | FALSE | FALSE | TRUE |
| <i>NKIRAS2</i> | FALSE | FALSE | TRUE |
| <i>NLRP2</i>   | FALSE | FALSE | TRUE |
| <i>NMNAT1</i>  | FALSE | FALSE | TRUE |
| <i>NMT1</i>    | FALSE | FALSE | TRUE |
| <i>NNT-AS1</i> | FALSE | FALSE | TRUE |
| <i>NOL11</i>   | FALSE | FALSE | TRUE |
| <i>NOL7</i>    | FALSE | FALSE | TRUE |
| <i>NOL9</i>    | FALSE | FALSE | TRUE |
| <i>NOP10</i>   | FALSE | FALSE | TRUE |
| <i>NOP16</i>   | FALSE | FALSE | TRUE |
| <i>NOP2</i>    | FALSE | FALSE | TRUE |
| <i>NOP56</i>   | FALSE | FALSE | TRUE |
| <i>NOP58</i>   | FALSE | FALSE | TRUE |
| <i>NPC1</i>    | FALSE | FALSE | TRUE |
| <i>NQO2</i>    | FALSE | FALSE | TRUE |
| <i>NR4A3</i>   | FALSE | FALSE | TRUE |
| <i>NRAS</i>    | FALSE | FALSE | TRUE |
| <i>NRBP1</i>   | FALSE | FALSE | TRUE |
| <i>NSFL1C</i>  | FALSE | FALSE | TRUE |
| <i>NSMCE1</i>  | FALSE | FALSE | TRUE |
| <i>NSRP1</i>   | FALSE | FALSE | TRUE |
| <i>NSUN4</i>   | FALSE | FALSE | TRUE |
| <i>NTMT1</i>   | FALSE | FALSE | TRUE |
| <i>NUBP2</i>   | FALSE | FALSE | TRUE |
| <i>NUDC</i>    | FALSE | FALSE | TRUE |
| <i>NUDCD1</i>  | FALSE | FALSE | TRUE |
| <i>NUDCD2</i>  | FALSE | FALSE | TRUE |
| <i>NUDT2</i>   | FALSE | FALSE | TRUE |
| <i>NUDT21</i>  | FALSE | FALSE | TRUE |
| <i>NUP133</i>  | FALSE | FALSE | TRUE |
| <i>NUP153</i>  | FALSE | FALSE | TRUE |
| <i>NUP155</i>  | FALSE | FALSE | TRUE |
| <i>NUP50</i>   | FALSE | FALSE | TRUE |
| <i>NUP54</i>   | FALSE | FALSE | TRUE |

---

---

|                   |       |       |      |
|-------------------|-------|-------|------|
| <i>NUP88</i>      | FALSE | FALSE | TRUE |
| <i>NUP98</i>      | FALSE | FALSE | TRUE |
| <i>NUS1</i>       | FALSE | FALSE | TRUE |
| <i>NUSAP1</i>     | FALSE | FALSE | TRUE |
| <i>NUTM2A-AS1</i> | FALSE | FALSE | TRUE |
| <i>NXT1</i>       | FALSE | FALSE | TRUE |
| <i>OAT</i>        | FALSE | FALSE | TRUE |
| <i>OPA1</i>       | FALSE | FALSE | TRUE |
| <i>OPA3</i>       | FALSE | FALSE | TRUE |
| <i>OSGEP</i>      | FALSE | FALSE | TRUE |
| <i>OSM</i>        | FALSE | FALSE | TRUE |
| <i>OSTC</i>       | FALSE | FALSE | TRUE |
| <i>OXSRI</i>      | FALSE | FALSE | TRUE |
| <i>PAK4</i>       | FALSE | FALSE | TRUE |
| <i>PAM</i>        | FALSE | FALSE | TRUE |
| <i>PANK2</i>      | FALSE | FALSE | TRUE |
| <i>PAPOLA</i>     | FALSE | FALSE | TRUE |
| <i>PAPSS1</i>     | FALSE | FALSE | TRUE |
| <i>PAQR3</i>      | FALSE | FALSE | TRUE |
| <i>PARL</i>       | FALSE | FALSE | TRUE |
| <i>PARVB</i>      | FALSE | FALSE | TRUE |
| <i>PATL1</i>      | FALSE | FALSE | TRUE |
| <i>PAXBPI</i>     | FALSE | FALSE | TRUE |
| <i>PBDC1</i>      | FALSE | FALSE | TRUE |
| <i>PCGF1</i>      | FALSE | FALSE | TRUE |
| <i>PCK2</i>       | FALSE | FALSE | TRUE |
| <i>PCMT1</i>      | FALSE | FALSE | TRUE |
| <i>PCNA</i>       | FALSE | FALSE | TRUE |
| <i>PDCD1</i>      | FALSE | FALSE | TRUE |
| <i>PDCD6</i>      | FALSE | FALSE | TRUE |
| <i>PDCL</i>       | FALSE | FALSE | TRUE |
| <i>PDCL3</i>      | FALSE | FALSE | TRUE |
| <i>PDE12</i>      | FALSE | FALSE | TRUE |
| <i>PDHB</i>       | FALSE | FALSE | TRUE |
| <i>PDHX</i>       | FALSE | FALSE | TRUE |
| <i>PDIA4</i>      | FALSE | FALSE | TRUE |
| <i>PDS5A</i>      | FALSE | FALSE | TRUE |
| <i>PDXK</i>       | FALSE | FALSE | TRUE |
| <i>PDXP</i>       | FALSE | FALSE | TRUE |
| <i>PEAK1</i>      | FALSE | FALSE | TRUE |
| <i>PER2</i>       | FALSE | FALSE | TRUE |
| <i>PEX2</i>       | FALSE | FALSE | TRUE |
| <i>PEX26</i>      | FALSE | FALSE | TRUE |
| <i>PEX3</i>       | FALSE | FALSE | TRUE |

---

---

|                 |       |       |      |
|-----------------|-------|-------|------|
| <i>PFDN1</i>    | FALSE | FALSE | TRUE |
| <i>PFDN4</i>    | FALSE | FALSE | TRUE |
| <i>PFKFB3</i>   | FALSE | FALSE | TRUE |
| <i>PGAM1</i>    | FALSE | FALSE | TRUE |
| <i>PGAP1</i>    | FALSE | FALSE | TRUE |
| <i>PGRMC1</i>   | FALSE | FALSE | TRUE |
| <i>PHLDA1</i>   | FALSE | FALSE | TRUE |
| <i>PHTF1</i>    | FALSE | FALSE | TRUE |
| <i>PHYH</i>     | FALSE | FALSE | TRUE |
| <i>PIM2</i>     | FALSE | FALSE | TRUE |
| <i>PITHD1</i>   | FALSE | FALSE | TRUE |
| <i>PITPNB</i>   | FALSE | FALSE | TRUE |
| <i>PLAA</i>     | FALSE | FALSE | TRUE |
| <i>PLEKHB2</i>  | FALSE | FALSE | TRUE |
| <i>PLGRKT</i>   | FALSE | FALSE | TRUE |
| <i>PMPCA</i>    | FALSE | FALSE | TRUE |
| <i>PMS1</i>     | FALSE | FALSE | TRUE |
| <i>PMS2</i>     | FALSE | FALSE | TRUE |
| <i>PNP</i>      | FALSE | FALSE | TRUE |
| <i>POC1A</i>    | FALSE | FALSE | TRUE |
| <i>POLB</i>     | FALSE | FALSE | TRUE |
| <i>POLD3</i>    | FALSE | FALSE | TRUE |
| <i>POLE3</i>    | FALSE | FALSE | TRUE |
| <i>POLR2A</i>   | FALSE | FALSE | TRUE |
| <i>POLR2B</i>   | FALSE | FALSE | TRUE |
| <i>POLR2C</i>   | FALSE | FALSE | TRUE |
| <i>POLR3E</i>   | FALSE | FALSE | TRUE |
| <i>POLR3H</i>   | FALSE | FALSE | TRUE |
| <i>POLR3K</i>   | FALSE | FALSE | TRUE |
| <i>POMGNT2</i>  | FALSE | FALSE | TRUE |
| <i>POMP</i>     | FALSE | FALSE | TRUE |
| <i>POMT2</i>    | FALSE | FALSE | TRUE |
| <i>POP7</i>     | FALSE | FALSE | TRUE |
| <i>POU2F2</i>   | FALSE | FALSE | TRUE |
| <i>PPAPDC1B</i> | FALSE | FALSE | TRUE |
| <i>PPAT</i>     | FALSE | FALSE | TRUE |
| <i>PPFIA1</i>   | FALSE | FALSE | TRUE |
| <i>PPIL3</i>    | FALSE | FALSE | TRUE |
| <i>PPIL4</i>    | FALSE | FALSE | TRUE |
| <i>PPM1G</i>    | FALSE | FALSE | TRUE |
| <i>PPME1</i>    | FALSE | FALSE | TRUE |
| <i>PPP1CB</i>   | FALSE | FALSE | TRUE |
| <i>PPP1R15A</i> | FALSE | FALSE | TRUE |
| <i>PPP1R16B</i> | FALSE | FALSE | TRUE |

---

---

|                |       |       |      |
|----------------|-------|-------|------|
| <i>PPP1R8</i>  | FALSE | FALSE | TRUE |
| <i>PPP2CA</i>  | FALSE | FALSE | TRUE |
| <i>PPP2R1A</i> | FALSE | FALSE | TRUE |
| <i>PPP2R1B</i> | FALSE | FALSE | TRUE |
| <i>PPP2R2A</i> | FALSE | FALSE | TRUE |
| <i>PPTC7</i>   | FALSE | FALSE | TRUE |
| <i>PQLC1</i>   | FALSE | FALSE | TRUE |
| <i>PRADC1</i>  | FALSE | FALSE | TRUE |
| <i>PRDM4</i>   | FALSE | FALSE | TRUE |
| <i>PREB</i>    | FALSE | FALSE | TRUE |
| <i>PRELID1</i> | FALSE | FALSE | TRUE |
| <i>PREPL</i>   | FALSE | FALSE | TRUE |
| <i>PRKAR2A</i> | FALSE | FALSE | TRUE |
| <i>PRKCD</i>   | FALSE | FALSE | TRUE |
| <i>PRPF4</i>   | FALSE | FALSE | TRUE |
| <i>PRPF40A</i> | FALSE | FALSE | TRUE |
| <i>PRPF8</i>   | FALSE | FALSE | TRUE |
| <i>PSAT1</i>   | FALSE | FALSE | TRUE |
| <i>PSMA1</i>   | FALSE | FALSE | TRUE |
| <i>PSMA2</i>   | FALSE | FALSE | TRUE |
| <i>PSMA3</i>   | FALSE | FALSE | TRUE |
| <i>PSMA4</i>   | FALSE | FALSE | TRUE |
| <i>PSMA6</i>   | FALSE | FALSE | TRUE |
| <i>PSMB7</i>   | FALSE | FALSE | TRUE |
| <i>PSMC3IP</i> | FALSE | FALSE | TRUE |
| <i>PSMC4</i>   | FALSE | FALSE | TRUE |
| <i>PSMC5</i>   | FALSE | FALSE | TRUE |
| <i>PSMC6</i>   | FALSE | FALSE | TRUE |
| <i>PSMD10</i>  | FALSE | FALSE | TRUE |
| <i>PSMD3</i>   | FALSE | FALSE | TRUE |
| <i>PSMD8</i>   | FALSE | FALSE | TRUE |
| <i>PSMD9</i>   | FALSE | FALSE | TRUE |
| <i>PSME4</i>   | FALSE | FALSE | TRUE |
| <i>PSMF1</i>   | FALSE | FALSE | TRUE |
| <i>PSMG1</i>   | FALSE | FALSE | TRUE |
| <i>PSMG2</i>   | FALSE | FALSE | TRUE |
| <i>PSPC1</i>   | FALSE | FALSE | TRUE |
| <i>PTCD2</i>   | FALSE | FALSE | TRUE |
| <i>PTER</i>    | FALSE | FALSE | TRUE |
| <i>PTGES2</i>  | FALSE | FALSE | TRUE |
| <i>PTGES3</i>  | FALSE | FALSE | TRUE |
| <i>PTPN1</i>   | FALSE | FALSE | TRUE |
| <i>PTRH1</i>   | FALSE | FALSE | TRUE |
| <i>PTS</i>     | FALSE | FALSE | TRUE |

---

---

|                 |       |       |      |
|-----------------|-------|-------|------|
| <i>PTTG1</i>    | FALSE | FALSE | TRUE |
| <i>PUF60</i>    | FALSE | FALSE | TRUE |
| <i>PUS1</i>     | FALSE | FALSE | TRUE |
| <i>PXDC1</i>    | FALSE | FALSE | TRUE |
| <i>PYCR1</i>    | FALSE | FALSE | TRUE |
| <i>PYCRL</i>    | FALSE | FALSE | TRUE |
| <i>QPCTL</i>    | FALSE | FALSE | TRUE |
| <i>QTRTD1</i>   | FALSE | FALSE | TRUE |
| <i>RAB10</i>    | FALSE | FALSE | TRUE |
| <i>RAB11A</i>   | FALSE | FALSE | TRUE |
| <i>RAB14</i>    | FALSE | FALSE | TRUE |
| <i>RAB1A</i>    | FALSE | FALSE | TRUE |
| <i>RAB21</i>    | FALSE | FALSE | TRUE |
| <i>RAB27A</i>   | FALSE | FALSE | TRUE |
| <i>RAB28</i>    | FALSE | FALSE | TRUE |
| <i>RAB35</i>    | FALSE | FALSE | TRUE |
| <i>RAB5A</i>    | FALSE | FALSE | TRUE |
| <i>RAB7A</i>    | FALSE | FALSE | TRUE |
| <i>RAB8B</i>    | FALSE | FALSE | TRUE |
| <i>RABEP1</i>   | FALSE | FALSE | TRUE |
| <i>RAD1</i>     | FALSE | FALSE | TRUE |
| <i>RAD23B</i>   | FALSE | FALSE | TRUE |
| <i>RAD51</i>    | FALSE | FALSE | TRUE |
| <i>RAD51AP1</i> | FALSE | FALSE | TRUE |
| <i>RAI14</i>    | FALSE | FALSE | TRUE |
| <i>RALA</i>     | FALSE | FALSE | TRUE |
| <i>RANBP2</i>   | FALSE | FALSE | TRUE |
| <i>RANBP3</i>   | FALSE | FALSE | TRUE |
| <i>RANGAP1</i>  | FALSE | FALSE | TRUE |
| <i>RAP1A</i>    | FALSE | FALSE | TRUE |
| <i>RAPGEF2</i>  | FALSE | FALSE | TRUE |
| <i>RBBP7</i>    | FALSE | FALSE | TRUE |
| <i>RBL1</i>     | FALSE | FALSE | TRUE |
| <i>RBM10</i>    | FALSE | FALSE | TRUE |
| <i>RBM12B</i>   | FALSE | FALSE | TRUE |
| <i>RBM17</i>    | FALSE | FALSE | TRUE |
| <i>RBM18</i>    | FALSE | FALSE | TRUE |
| <i>RBM22</i>    | FALSE | FALSE | TRUE |
| <i>RBM27</i>    | FALSE | FALSE | TRUE |
| <i>RBM42</i>    | FALSE | FALSE | TRUE |
| <i>RBPJ</i>     | FALSE | FALSE | TRUE |
| <i>RCN1</i>     | FALSE | FALSE | TRUE |
| <i>RDH10</i>    | FALSE | FALSE | TRUE |
| <i>RDH13</i>    | FALSE | FALSE | TRUE |

---



---

|                  |       |       |      |
|------------------|-------|-------|------|
| <i>REL</i>       | FALSE | FALSE | TRUE |
| <i>RELB</i>      | FALSE | FALSE | TRUE |
| <i>RELT</i>      | FALSE | FALSE | TRUE |
| <i>REXO2</i>     | FALSE | FALSE | TRUE |
| <i>RFESD</i>     | FALSE | FALSE | TRUE |
| <i>RFK</i>       | FALSE | FALSE | TRUE |
| <i>RFTN1</i>     | FALSE | FALSE | TRUE |
| <i>RGCC</i>      | FALSE | FALSE | TRUE |
| <i>RHOG</i>      | FALSE | FALSE | TRUE |
| <i>RILPL2</i>    | FALSE | FALSE | TRUE |
| <i>RINT1</i>     | FALSE | FALSE | TRUE |
| <i>RIOK2</i>     | FALSE | FALSE | TRUE |
| <i>RNF121</i>    | FALSE | FALSE | TRUE |
| <i>RNF185</i>    | FALSE | FALSE | TRUE |
| <i>RNF19A</i>    | FALSE | FALSE | TRUE |
| <i>RNF4</i>      | FALSE | FALSE | TRUE |
| <i>RNF41</i>     | FALSE | FALSE | TRUE |
| <i>RNF8</i>      | FALSE | FALSE | TRUE |
| <i>RNMT</i>      | FALSE | FALSE | TRUE |
| <i>RNMTL1</i>    | FALSE | FALSE | TRUE |
| <i>RP9</i>       | FALSE | FALSE | TRUE |
| <i>RPA3</i>      | FALSE | FALSE | TRUE |
| <i>RPF1</i>      | FALSE | FALSE | TRUE |
| <i>RPL23AP53</i> | FALSE | FALSE | TRUE |
| <i>RPL23AP82</i> | FALSE | FALSE | TRUE |
| <i>RPL26L1</i>   | FALSE | FALSE | TRUE |
| <i>RPN1</i>      | FALSE | FALSE | TRUE |
| <i>RPP25L</i>    | FALSE | FALSE | TRUE |
| <i>RPS19BP1</i>  | FALSE | FALSE | TRUE |
| <i>RPS6KA2</i>   | FALSE | FALSE | TRUE |
| <i>RPS6KA5</i>   | FALSE | FALSE | TRUE |
| <i>RPUSD3</i>    | FALSE | FALSE | TRUE |
| <i>RRAGC</i>     | FALSE | FALSE | TRUE |
| <i>RRM1</i>      | FALSE | FALSE | TRUE |
| <i>RRM2B</i>     | FALSE | FALSE | TRUE |
| <i>RRP12</i>     | FALSE | FALSE | TRUE |
| <i>RRP15</i>     | FALSE | FALSE | TRUE |
| <i>RSL24D1</i>   | FALSE | FALSE | TRUE |
| <i>RSPRY1</i>    | FALSE | FALSE | TRUE |
| <i>RSRC2</i>     | FALSE | FALSE | TRUE |
| <i>RTFDC1</i>    | FALSE | FALSE | TRUE |
| <i>RWDD1</i>     | FALSE | FALSE | TRUE |
| <i>SIPR2</i>     | FALSE | FALSE | TRUE |
| <i>SAC3D1</i>    | FALSE | FALSE | TRUE |

---

---

|                 |       |       |      |
|-----------------|-------|-------|------|
| <i>SAFB</i>     | FALSE | FALSE | TRUE |
| <i>SAMD4A</i>   | FALSE | FALSE | TRUE |
| <i>SAMD4B</i>   | FALSE | FALSE | TRUE |
| <i>SAMM50</i>   | FALSE | FALSE | TRUE |
| <i>SAMSN1</i>   | FALSE | FALSE | TRUE |
| <i>SAP18</i>    | FALSE | FALSE | TRUE |
| <i>SAR1B</i>    | FALSE | FALSE | TRUE |
| <i>SARNP</i>    | FALSE | FALSE | TRUE |
| <i>SART3</i>    | FALSE | FALSE | TRUE |
| <i>SASS6</i>    | FALSE | FALSE | TRUE |
| <i>SBF2-AS1</i> | FALSE | FALSE | TRUE |
| <i>SBNO1</i>    | FALSE | FALSE | TRUE |
| <i>SBNO2</i>    | FALSE | FALSE | TRUE |
| <i>SCAF1</i>    | FALSE | FALSE | TRUE |
| <i>SCML2</i>    | FALSE | FALSE | TRUE |
| <i>SCYL1</i>    | FALSE | FALSE | TRUE |
| <i>SCYL2</i>    | FALSE | FALSE | TRUE |
| <i>SDE2</i>     | FALSE | FALSE | TRUE |
| <i>SDHAF2</i>   | FALSE | FALSE | TRUE |
| <i>SDHB</i>     | FALSE | FALSE | TRUE |
| <i>SEC14L1</i>  | FALSE | FALSE | TRUE |
| <i>SEC23B</i>   | FALSE | FALSE | TRUE |
| <i>SEC24C</i>   | FALSE | FALSE | TRUE |
| <i>SEC61A1</i>  | FALSE | FALSE | TRUE |
| <i>SEC61B</i>   | FALSE | FALSE | TRUE |
| <i>SEC63</i>    | FALSE | FALSE | TRUE |
| <i>SELK</i>     | FALSE | FALSE | TRUE |
| <i>SENP2</i>    | FALSE | FALSE | TRUE |
| <i>8-Sep</i>    | FALSE | FALSE | TRUE |
| <i>SERAC1</i>   | FALSE | FALSE | TRUE |
| <i>SERPINH1</i> | FALSE | FALSE | TRUE |
| <i>SESN2</i>    | FALSE | FALSE | TRUE |
| <i>SETMAR</i>   | FALSE | FALSE | TRUE |
| <i>SF3B2</i>    | FALSE | FALSE | TRUE |
| <i>SF3B6</i>    | FALSE | FALSE | TRUE |
| <i>SFT2D1</i>   | FALSE | FALSE | TRUE |
| <i>SFXN5</i>    | FALSE | FALSE | TRUE |
| <i>SGK223</i>   | FALSE | FALSE | TRUE |
| <i>SGPP2</i>    | FALSE | FALSE | TRUE |
| <i>SH2D4A</i>   | FALSE | FALSE | TRUE |
| <i>SH3BGR</i>   | FALSE | FALSE | TRUE |
| <i>SHMT1</i>    | FALSE | FALSE | TRUE |
| <i>SHOC2</i>    | FALSE | FALSE | TRUE |
| <i>SIKE1</i>    | FALSE | FALSE | TRUE |

---

---

|                 |       |       |      |
|-----------------|-------|-------|------|
| <i>SKIL</i>     | FALSE | FALSE | TRUE |
| <i>SKIV2L2</i>  | FALSE | FALSE | TRUE |
| <i>SLBP</i>     | FALSE | FALSE | TRUE |
| <i>SLC16A1</i>  | FALSE | FALSE | TRUE |
| <i>SLC16A13</i> | FALSE | FALSE | TRUE |
| <i>SLC19A1</i>  | FALSE | FALSE | TRUE |
| <i>SLC1A4</i>   | FALSE | FALSE | TRUE |
| <i>SLC20A1</i>  | FALSE | FALSE | TRUE |
| <i>SLC25A17</i> | FALSE | FALSE | TRUE |
| <i>SLC25A33</i> | FALSE | FALSE | TRUE |
| <i>SLC25A5</i>  | FALSE | FALSE | TRUE |
| <i>SLC25A51</i> | FALSE | FALSE | TRUE |
| <i>SLC26A2</i>  | FALSE | FALSE | TRUE |
| <i>SLC30A5</i>  | FALSE | FALSE | TRUE |
| <i>SLC30A7</i>  | FALSE | FALSE | TRUE |
| <i>SLC30A9</i>  | FALSE | FALSE | TRUE |
| <i>SLC31A1</i>  | FALSE | FALSE | TRUE |
| <i>SLC35C1</i>  | FALSE | FALSE | TRUE |
| <i>SLC35D1</i>  | FALSE | FALSE | TRUE |
| <i>SLC35E1</i>  | FALSE | FALSE | TRUE |
| <i>SLC35E4</i>  | FALSE | FALSE | TRUE |
| <i>SLC36A4</i>  | FALSE | FALSE | TRUE |
| <i>SLC39A11</i> | FALSE | FALSE | TRUE |
| <i>SLC39A8</i>  | FALSE | FALSE | TRUE |
| <i>SLC4A1AP</i> | FALSE | FALSE | TRUE |
| <i>SLC52A2</i>  | FALSE | FALSE | TRUE |
| <i>SLC5A6</i>   | FALSE | FALSE | TRUE |
| <i>SLC7A1</i>   | FALSE | FALSE | TRUE |
| <i>SLC7A5</i>   | FALSE | FALSE | TRUE |
| <i>SLC9A7</i>   | FALSE | FALSE | TRUE |
| <i>SLCO4A1</i>  | FALSE | FALSE | TRUE |
| <i>SLIRP</i>    | FALSE | FALSE | TRUE |
| <i>SMAD2</i>    | FALSE | FALSE | TRUE |
| <i>SMARCA5</i>  | FALSE | FALSE | TRUE |
| <i>SMC3</i>     | FALSE | FALSE | TRUE |
| <i>SMC4</i>     | FALSE | FALSE | TRUE |
| <i>SMC5</i>     | FALSE | FALSE | TRUE |
| <i>SMCO4</i>    | FALSE | FALSE | TRUE |
| <i>SMIM12</i>   | FALSE | FALSE | TRUE |
| <i>SMIM13</i>   | FALSE | FALSE | TRUE |
| <i>SMIM3</i>    | FALSE | FALSE | TRUE |
| <i>SMIM7</i>    | FALSE | FALSE | TRUE |
| <i>SMIM8</i>    | FALSE | FALSE | TRUE |
| <i>SMKR1</i>    | FALSE | FALSE | TRUE |

---

---

|                 |       |       |      |
|-----------------|-------|-------|------|
| <i>SMNDC1</i>   | FALSE | FALSE | TRUE |
| <i>SMPD2</i>    | FALSE | FALSE | TRUE |
| <i>SMUI</i>     | FALSE | FALSE | TRUE |
| <i>SMUG1</i>    | FALSE | FALSE | TRUE |
| <i>SMYD5</i>    | FALSE | FALSE | TRUE |
| <i>SNAPC1</i>   | FALSE | FALSE | TRUE |
| <i>SNAPC2</i>   | FALSE | FALSE | TRUE |
| <i>SNIP1</i>    | FALSE | FALSE | TRUE |
| <i>SNRPB2</i>   | FALSE | FALSE | TRUE |
| <i>SNW1</i>     | FALSE | FALSE | TRUE |
| <i>SNX11</i>    | FALSE | FALSE | TRUE |
| <i>SNX16</i>    | FALSE | FALSE | TRUE |
| <i>SNX25</i>    | FALSE | FALSE | TRUE |
| <i>SNX3</i>     | FALSE | FALSE | TRUE |
| <i>SNX8</i>     | FALSE | FALSE | TRUE |
| <i>SNX9</i>     | FALSE | FALSE | TRUE |
| <i>SOCS4</i>    | FALSE | FALSE | TRUE |
| <i>SOCS7</i>    | FALSE | FALSE | TRUE |
| <i>SPATA2</i>   | FALSE | FALSE | TRUE |
| <i>SPATA2L</i>  | FALSE | FALSE | TRUE |
| <i>SPATS2L</i>  | FALSE | FALSE | TRUE |
| <i>SPHK1</i>    | FALSE | FALSE | TRUE |
| <i>SPHK2</i>    | FALSE | FALSE | TRUE |
| <i>SPIRE1</i>   | FALSE | FALSE | TRUE |
| <i>SPRTN</i>    | FALSE | FALSE | TRUE |
| <i>SPRYD4</i>   | FALSE | FALSE | TRUE |
| <i>SPRYD7</i>   | FALSE | FALSE | TRUE |
| <i>SPTLC1</i>   | FALSE | FALSE | TRUE |
| <i>SPTSSA</i>   | FALSE | FALSE | TRUE |
| <i>SRA1</i>     | FALSE | FALSE | TRUE |
| <i>SRD5A3</i>   | FALSE | FALSE | TRUE |
| <i>SREK1</i>    | FALSE | FALSE | TRUE |
| <i>SREK1IP1</i> | FALSE | FALSE | TRUE |
| <i>SRFBP1</i>   | FALSE | FALSE | TRUE |
| <i>SRGN</i>     | FALSE | FALSE | TRUE |
| <i>SRP19</i>    | FALSE | FALSE | TRUE |
| <i>SRP54</i>    | FALSE | FALSE | TRUE |
| <i>SRP68</i>    | FALSE | FALSE | TRUE |
| <i>SRP9</i>     | FALSE | FALSE | TRUE |
| <i>SRPRB</i>    | FALSE | FALSE | TRUE |
| <i>SRRT</i>     | FALSE | FALSE | TRUE |
| <i>SRSF2</i>    | FALSE | FALSE | TRUE |
| <i>SRSF3</i>    | FALSE | FALSE | TRUE |
| <i>SRSF7</i>    | FALSE | FALSE | TRUE |

---

---

|                |       |       |      |
|----------------|-------|-------|------|
| <i>SRXN1</i>   | FALSE | FALSE | TRUE |
| <i>SSB</i>     | FALSE | FALSE | TRUE |
| <i>SSR1</i>    | FALSE | FALSE | TRUE |
| <i>SSR3</i>    | FALSE | FALSE | TRUE |
| <i>SSSCA1</i>  | FALSE | FALSE | TRUE |
| <i>ST3GAL4</i> | FALSE | FALSE | TRUE |
| <i>ST8SIA4</i> | FALSE | FALSE | TRUE |
| <i>STAG1</i>   | FALSE | FALSE | TRUE |
| <i>STAM2</i>   | FALSE | FALSE | TRUE |
| <i>STARD4</i>  | FALSE | FALSE | TRUE |
| <i>STAT3</i>   | FALSE | FALSE | TRUE |
| <i>STAU1</i>   | FALSE | FALSE | TRUE |
| <i>STIP1</i>   | FALSE | FALSE | TRUE |
| <i>STK40</i>   | FALSE | FALSE | TRUE |
| <i>STOML1</i>  | FALSE | FALSE | TRUE |
| <i>STRAP</i>   | FALSE | FALSE | TRUE |
| <i>STRBP</i>   | FALSE | FALSE | TRUE |
| <i>STRN3</i>   | FALSE | FALSE | TRUE |
| <i>STRN4</i>   | FALSE | FALSE | TRUE |
| <i>STT3A</i>   | FALSE | FALSE | TRUE |
| <i>STX11</i>   | FALSE | FALSE | TRUE |
| <i>STX18</i>   | FALSE | FALSE | TRUE |
| <i>SUB1</i>    | FALSE | FALSE | TRUE |
| <i>SUCLG1</i>  | FALSE | FALSE | TRUE |
| <i>SUGT1</i>   | FALSE | FALSE | TRUE |
| <i>SUMO1</i>   | FALSE | FALSE | TRUE |
| <i>SUPT5H</i>  | FALSE | FALSE | TRUE |
| <i>SUPT6H</i>  | FALSE | FALSE | TRUE |
| <i>SUPV3L1</i> | FALSE | FALSE | TRUE |
| <i>SURF2</i>   | FALSE | FALSE | TRUE |
| <i>SWI5</i>    | FALSE | FALSE | TRUE |
| <i>SYAP1</i>   | FALSE | FALSE | TRUE |
| <i>SYP</i>     | FALSE | FALSE | TRUE |
| <i>TACCI</i>   | FALSE | FALSE | TRUE |
| <i>TAF12</i>   | FALSE | FALSE | TRUE |
| <i>TAF1D</i>   | FALSE | FALSE | TRUE |
| <i>TAF5</i>    | FALSE | FALSE | TRUE |
| <i>TAF9B</i>   | FALSE | FALSE | TRUE |
| <i>TARDBP</i>  | FALSE | FALSE | TRUE |
| <i>TATDN1</i>  | FALSE | FALSE | TRUE |
| <i>TBK1</i>    | FALSE | FALSE | TRUE |
| <i>TBKBP1</i>  | FALSE | FALSE | TRUE |
| <i>TBLIX</i>   | FALSE | FALSE | TRUE |
| <i>TBL2</i>    | FALSE | FALSE | TRUE |

---

---

|                 |       |       |      |
|-----------------|-------|-------|------|
| <i>TBPL1</i>    | FALSE | FALSE | TRUE |
| <i>TCEA1</i>    | FALSE | FALSE | TRUE |
| <i>TCEB1</i>    | FALSE | FALSE | TRUE |
| <i>TCEB3</i>    | FALSE | FALSE | TRUE |
| <i>TCOF1</i>    | FALSE | FALSE | TRUE |
| <i>TEX10</i>    | FALSE | FALSE | TRUE |
| <i>TEX30</i>    | FALSE | FALSE | TRUE |
| <i>TFAM</i>     | FALSE | FALSE | TRUE |
| <i>TFB1M</i>    | FALSE | FALSE | TRUE |
| <i>TFB2M</i>    | FALSE | FALSE | TRUE |
| <i>TFCP2</i>    | FALSE | FALSE | TRUE |
| <i>TFIP11</i>   | FALSE | FALSE | TRUE |
| <i>TGS1</i>     | FALSE | FALSE | TRUE |
| <i>THADA</i>    | FALSE | FALSE | TRUE |
| <i>THAP1</i>    | FALSE | FALSE | TRUE |
| <i>THAP2</i>    | FALSE | FALSE | TRUE |
| <i>THAP5</i>    | FALSE | FALSE | TRUE |
| <i>THOC3</i>    | FALSE | FALSE | TRUE |
| <i>THRAP3</i>   | FALSE | FALSE | TRUE |
| <i>TIAM2</i>    | FALSE | FALSE | TRUE |
| <i>TIGD6</i>    | FALSE | FALSE | TRUE |
| <i>TIMM17B</i>  | FALSE | FALSE | TRUE |
| <i>TIMM23B</i>  | FALSE | FALSE | TRUE |
| <i>TIMM8A</i>   | FALSE | FALSE | TRUE |
| <i>TLE3</i>     | FALSE | FALSE | TRUE |
| <i>TM9SF2</i>   | FALSE | FALSE | TRUE |
| <i>TM9SF3</i>   | FALSE | FALSE | TRUE |
| <i>TMED1</i>    | FALSE | FALSE | TRUE |
| <i>TMED3</i>    | FALSE | FALSE | TRUE |
| <i>TMED9</i>    | FALSE | FALSE | TRUE |
| <i>TMEM109</i>  | FALSE | FALSE | TRUE |
| <i>TMEM126A</i> | FALSE | FALSE | TRUE |
| <i>TMEM126B</i> | FALSE | FALSE | TRUE |
| <i>TMEM150A</i> | FALSE | FALSE | TRUE |
| <i>TMEM173</i>  | FALSE | FALSE | TRUE |
| <i>TMEM180</i>  | FALSE | FALSE | TRUE |
| <i>TMEM184C</i> | FALSE | FALSE | TRUE |
| <i>TMEM185A</i> | FALSE | FALSE | TRUE |
| <i>TMEM2</i>    | FALSE | FALSE | TRUE |
| <i>TMEM237</i>  | FALSE | FALSE | TRUE |
| <i>TMEM241</i>  | FALSE | FALSE | TRUE |
| <i>TMEM38B</i>  | FALSE | FALSE | TRUE |
| <i>TMEM39A</i>  | FALSE | FALSE | TRUE |
| <i>TMEM41A</i>  | FALSE | FALSE | TRUE |

---

---

|                 |       |       |      |
|-----------------|-------|-------|------|
| <i>TMEM5</i>    | FALSE | FALSE | TRUE |
| <i>TMEM60</i>   | FALSE | FALSE | TRUE |
| <i>TMEM63B</i>  | FALSE | FALSE | TRUE |
| <i>TMEM87A</i>  | FALSE | FALSE | TRUE |
| <i>TMEM99</i>   | FALSE | FALSE | TRUE |
| <i>TMPO</i>     | FALSE | FALSE | TRUE |
| <i>TMTC3</i>    | FALSE | FALSE | TRUE |
| <i>TMX1</i>     | FALSE | FALSE | TRUE |
| <i>TNFRSF1B</i> | FALSE | FALSE | TRUE |
| <i>TNFRSF8</i>  | FALSE | FALSE | TRUE |
| <i>TNPO1</i>    | FALSE | FALSE | TRUE |
| <i>TOB2</i>     | FALSE | FALSE | TRUE |
| <i>TOE1</i>     | FALSE | FALSE | TRUE |
| <i>TOLLIP</i>   | FALSE | FALSE | TRUE |
| <i>TOMM20</i>   | FALSE | FALSE | TRUE |
| <i>TOMM22</i>   | FALSE | FALSE | TRUE |
| <i>TOP1</i>     | FALSE | FALSE | TRUE |
| <i>TOR1A</i>    | FALSE | FALSE | TRUE |
| <i>TOR1B</i>    | FALSE | FALSE | TRUE |
| <i>TOR4A</i>    | FALSE | FALSE | TRUE |
| <i>TP53BP1</i>  | FALSE | FALSE | TRUE |
| <i>TP53BP2</i>  | FALSE | FALSE | TRUE |
| <i>TPD52L2</i>  | FALSE | FALSE | TRUE |
| <i>TPM4</i>     | FALSE | FALSE | TRUE |
| <i>TPRA1</i>    | FALSE | FALSE | TRUE |
| <i>TRA2B</i>    | FALSE | FALSE | TRUE |
| <i>TRAF1</i>    | FALSE | FALSE | TRUE |
| <i>TRAF3</i>    | FALSE | FALSE | TRUE |
| <i>TRAPPC13</i> | FALSE | FALSE | TRUE |
| <i>TRAPPC3</i>  | FALSE | FALSE | TRUE |
| <i>TRIAP1</i>   | FALSE | FALSE | TRUE |
| <i>TRIB3</i>    | FALSE | FALSE | TRUE |
| <i>TRMT10C</i>  | FALSE | FALSE | TRUE |
| <i>TRMT13</i>   | FALSE | FALSE | TRUE |
| <i>TRMT44</i>   | FALSE | FALSE | TRUE |
| <i>TRMT5</i>    | FALSE | FALSE | TRUE |
| <i>TRMT6</i>    | FALSE | FALSE | TRUE |
| <i>TRNT1</i>    | FALSE | FALSE | TRUE |
| <i>TSEN34</i>   | FALSE | FALSE | TRUE |
| <i>TSN</i>      | FALSE | FALSE | TRUE |
| <i>TSPAN5</i>   | FALSE | FALSE | TRUE |
| <i>TSTD2</i>    | FALSE | FALSE | TRUE |
| <i>TPAL</i>     | FALSE | FALSE | TRUE |
| <i>TUBA4A</i>   | FALSE | FALSE | TRUE |

---

---

|                |       |       |      |
|----------------|-------|-------|------|
| <i>TUBB4A</i>  | FALSE | FALSE | TRUE |
| <i>TUSC2</i>   | FALSE | FALSE | TRUE |
| <i>TUT1</i>    | FALSE | FALSE | TRUE |
| <i>TWISTNB</i> | FALSE | FALSE | TRUE |
| <i>TXLNG</i>   | FALSE | FALSE | TRUE |
| <i>TXNDC17</i> | FALSE | FALSE | TRUE |
| <i>TXNDC9</i>  | FALSE | FALSE | TRUE |
| <i>TXNL1</i>   | FALSE | FALSE | TRUE |
| <i>TXNL4A</i>  | FALSE | FALSE | TRUE |
| <i>U2AF1</i>   | FALSE | FALSE | TRUE |
| <i>U2AF2</i>   | FALSE | FALSE | TRUE |
| <i>U2SURP</i>  | FALSE | FALSE | TRUE |
| <i>UBA6</i>    | FALSE | FALSE | TRUE |
| <i>UBE2A</i>   | FALSE | FALSE | TRUE |
| <i>UBE2D1</i>  | FALSE | FALSE | TRUE |
| <i>UBE2D3</i>  | FALSE | FALSE | TRUE |
| <i>UBE2D4</i>  | FALSE | FALSE | TRUE |
| <i>UBE2E1</i>  | FALSE | FALSE | TRUE |
| <i>UBE2I</i>   | FALSE | FALSE | TRUE |
| <i>UBE2J2</i>  | FALSE | FALSE | TRUE |
| <i>UBE2K</i>   | FALSE | FALSE | TRUE |
| <i>UBE2L3</i>  | FALSE | FALSE | TRUE |
| <i>UBE2N</i>   | FALSE | FALSE | TRUE |
| <i>UBE2O</i>   | FALSE | FALSE | TRUE |
| <i>UBE2S</i>   | FALSE | FALSE | TRUE |
| <i>UBE3A</i>   | FALSE | FALSE | TRUE |
| <i>UBE3D</i>   | FALSE | FALSE | TRUE |
| <i>UBFD1</i>   | FALSE | FALSE | TRUE |
| <i>UBIAD1</i>  | FALSE | FALSE | TRUE |
| <i>UBQLN1</i>  | FALSE | FALSE | TRUE |
| <i>UBR7</i>    | FALSE | FALSE | TRUE |
| <i>UBTD2</i>   | FALSE | FALSE | TRUE |
| <i>UEVLD</i>   | FALSE | FALSE | TRUE |
| <i>UHRF1</i>   | FALSE | FALSE | TRUE |
| <i>UMPS</i>    | FALSE | FALSE | TRUE |
| <i>UNC50</i>   | FALSE | FALSE | TRUE |
| <i>UPF1</i>    | FALSE | FALSE | TRUE |
| <i>UQCC2</i>   | FALSE | FALSE | TRUE |
| <i>UQCRC1</i>  | FALSE | FALSE | TRUE |
| <i>UQCRC2</i>  | FALSE | FALSE | TRUE |
| <i>UQCRFS1</i> | FALSE | FALSE | TRUE |
| <i>URM1</i>    | FALSE | FALSE | TRUE |
| <i>USB1</i>    | FALSE | FALSE | TRUE |
| <i>USP1</i>    | FALSE | FALSE | TRUE |

---



---

|                 |       |       |      |
|-----------------|-------|-------|------|
| <i>USP10</i>    | FALSE | FALSE | TRUE |
| <i>USP12</i>    | FALSE | FALSE | TRUE |
| <i>USP14</i>    | FALSE | FALSE | TRUE |
| <i>USP16</i>    | FALSE | FALSE | TRUE |
| <i>USP38</i>    | FALSE | FALSE | TRUE |
| <i>USP39</i>    | FALSE | FALSE | TRUE |
| <i>USP45</i>    | FALSE | FALSE | TRUE |
| <i>USP54</i>    | FALSE | FALSE | TRUE |
| <i>UTP23</i>    | FALSE | FALSE | TRUE |
| <i>VAPA</i>     | FALSE | FALSE | TRUE |
| <i>VASP</i>     | FALSE | FALSE | TRUE |
| <i>VBPI</i>     | FALSE | FALSE | TRUE |
| <i>VCP</i>      | FALSE | FALSE | TRUE |
| <i>VDAC1</i>    | FALSE | FALSE | TRUE |
| <i>VKORCIL1</i> | FALSE | FALSE | TRUE |
| <i>VMA21</i>    | FALSE | FALSE | TRUE |
| <i>VPS26A</i>   | FALSE | FALSE | TRUE |
| <i>VPS35</i>    | FALSE | FALSE | TRUE |
| <i>VPS37A</i>   | FALSE | FALSE | TRUE |
| <i>VTAI</i>     | FALSE | FALSE | TRUE |
| <i>VTI1B</i>    | FALSE | FALSE | TRUE |
| <i>WARS2</i>    | FALSE | FALSE | TRUE |
| <i>WBP11</i>    | FALSE | FALSE | TRUE |
| <i>WBSCR16</i>  | FALSE | FALSE | TRUE |
| <i>WDR20</i>    | FALSE | FALSE | TRUE |
| <i>WDR33</i>    | FALSE | FALSE | TRUE |
| <i>WDR47</i>    | FALSE | FALSE | TRUE |
| <i>WDR61</i>    | FALSE | FALSE | TRUE |
| <i>WDR74</i>    | FALSE | FALSE | TRUE |
| <i>WDR76</i>    | FALSE | FALSE | TRUE |
| <i>WDR83</i>    | FALSE | FALSE | TRUE |
| <i>WDR92</i>    | FALSE | FALSE | TRUE |
| <i>WDYHV1</i>   | FALSE | FALSE | TRUE |
| <i>WFS1</i>     | FALSE | FALSE | TRUE |
| <i>WRB</i>      | FALSE | FALSE | TRUE |
| <i>WRNIP1</i>   | FALSE | FALSE | TRUE |
| <i>XPO4</i>     | FALSE | FALSE | TRUE |
| <i>XRCC6</i>    | FALSE | FALSE | TRUE |
| <i>XRN2</i>     | FALSE | FALSE | TRUE |
| <i>XRRA1</i>    | FALSE | FALSE | TRUE |
| <i>YDJC</i>     | FALSE | FALSE | TRUE |
| <i>YEATS4</i>   | FALSE | FALSE | TRUE |
| <i>YIF1A</i>    | FALSE | FALSE | TRUE |
| <i>YIPF2</i>    | FALSE | FALSE | TRUE |

---

---

|                |       |       |      |
|----------------|-------|-------|------|
| <i>YIPF6</i>   | FALSE | FALSE | TRUE |
| <i>YME1L1</i>  | FALSE | FALSE | TRUE |
| <i>YRDC</i>    | FALSE | FALSE | TRUE |
| <i>YTHDF2</i>  | FALSE | FALSE | TRUE |
| <i>ZBTB6</i>   | FALSE | FALSE | TRUE |
| <i>ZC3H15</i>  | FALSE | FALSE | TRUE |
| <i>ZC3H18</i>  | FALSE | FALSE | TRUE |
| <i>ZC3HC1</i>  | FALSE | FALSE | TRUE |
| <i>ZCCHC17</i> | FALSE | FALSE | TRUE |
| <i>ZCCHC6</i>  | FALSE | FALSE | TRUE |
| <i>ZCRB1</i>   | FALSE | FALSE | TRUE |
| <i>ZDHHC13</i> | FALSE | FALSE | TRUE |
| <i>ZDHHC5</i>  | FALSE | FALSE | TRUE |
| <i>ZFR</i>     | FALSE | FALSE | TRUE |
| <i>ZKSCAN2</i> | FALSE | FALSE | TRUE |
| <i>ZMAT2</i>   | FALSE | FALSE | TRUE |
| <i>ZMAT5</i>   | FALSE | FALSE | TRUE |
| <i>ZNF165</i>  | FALSE | FALSE | TRUE |
| <i>ZNF17</i>   | FALSE | FALSE | TRUE |
| <i>ZNF189</i>  | FALSE | FALSE | TRUE |
| <i>ZNF195</i>  | FALSE | FALSE | TRUE |
| <i>ZNF207</i>  | FALSE | FALSE | TRUE |
| <i>ZNF267</i>  | FALSE | FALSE | TRUE |
| <i>ZNF271</i>  | FALSE | FALSE | TRUE |
| <i>ZNF273</i>  | FALSE | FALSE | TRUE |
| <i>ZNF280C</i> | FALSE | FALSE | TRUE |
| <i>ZNF286A</i> | FALSE | FALSE | TRUE |
| <i>ZNF326</i>  | FALSE | FALSE | TRUE |
| <i>ZNF330</i>  | FALSE | FALSE | TRUE |
| <i>ZNF410</i>  | FALSE | FALSE | TRUE |
| <i>ZNF473</i>  | FALSE | FALSE | TRUE |
| <i>ZNF526</i>  | FALSE | FALSE | TRUE |
| <i>ZNF542P</i> | FALSE | FALSE | TRUE |
| <i>ZNF544</i>  | FALSE | FALSE | TRUE |
| <i>ZNF561</i>  | FALSE | FALSE | TRUE |
| <i>ZNF576</i>  | FALSE | FALSE | TRUE |
| <i>ZNF579</i>  | FALSE | FALSE | TRUE |
| <i>ZNF593</i>  | FALSE | FALSE | TRUE |
| <i>ZNF644</i>  | FALSE | FALSE | TRUE |
| <i>ZNF653</i>  | FALSE | FALSE | TRUE |
| <i>ZNF668</i>  | FALSE | FALSE | TRUE |
| <i>ZNF669</i>  | FALSE | FALSE | TRUE |
| <i>ZNF672</i>  | FALSE | FALSE | TRUE |
| <i>ZNF684</i>  | FALSE | FALSE | TRUE |

---

---

|                |       |       |      |
|----------------|-------|-------|------|
| <i>ZNF7</i>    | FALSE | FALSE | TRUE |
| <i>ZNF710</i>  | FALSE | FALSE | TRUE |
| <i>ZNF74</i>   | FALSE | FALSE | TRUE |
| <i>ZNF746</i>  | FALSE | FALSE | TRUE |
| <i>ZNF765</i>  | FALSE | FALSE | TRUE |
| <i>ZNF778</i>  | FALSE | FALSE | TRUE |
| <i>ZNF787</i>  | FALSE | FALSE | TRUE |
| <i>ZNRF1</i>   | FALSE | FALSE | TRUE |
| <i>ZPR1</i>    | FALSE | FALSE | TRUE |
| <i>ZSCAN12</i> | FALSE | FALSE | TRUE |
| <i>ZSCAN5A</i> | FALSE | FALSE | TRUE |
| <i>ZSCAN9</i>  | FALSE | FALSE | TRUE |
| <i>ZUFSP</i>   | FALSE | FALSE | TRUE |

---

**Note: 'TRUE' denotes that one upregulated gene is regulated by the indicated factor.**
